# Supplementary material
Source: PubMed Central journal article supplement (PMC8525336)
Supplement: bloodBLD2020010260-suppl1.pdf [file bloodBLD2020010260-suppl1.pdf]

## REINHARDT, HABIB ET AL. SUPPLEMENTAL TABLES AND FIGURES

### SUPPLEMENTAL FIGURES

**Supplemental Figure 1.** *Growth Curves.*

**Supplemental Figure 2.** *Correlation of Shannon Diversity Index and mean granulocyte vector copy number (VCN).*

**Supplemental Figure 3.** *Unique Vector Integration Sites per Patient*

**Supplemental Figure 4.** *Analysis of clones with MECOM-adjacent integrants.*

**Supplemental Figure 5.** *Median absolute lymphocyte counts (ALC) versus (A) median PBMC ADA enzyme activity and (B) age at gene therapy.*

**Supplemental Figure 6.** *Correlation of TCR Repertoire Diversity at t1 vs. t2.*

**Supplemental Figure 7.** *Correlation of TCR Repertoire Diversity and Gene Marking (VCN) in PBMC and Granulocytes.*

**Supplemental Figure 8.** *Correlation between Subject Age and Clone Count.*

### SUPPLEMENTAL TABLES

**Supplemental Table 1.** MND ADA Vector Integration Site Data (Gene Details)

**Supplemental Table 2.** Coefficient of Variation (sd/mean) for Lymphocyte Subsets.

**Supplemental Table 3.** Vaccine administrations and titer responses

**Supplemental Table 4.** *TRBV* Sequencing Meta-Data

**Supplemental Table 5.** CD34+ cell dose, cell product vector copy number, and busulfan conditioning intensity.

**Supplemental Table 6.** Correlations between cell dose and AUC with granulocyte VCN.

### Analysis of integration site distributions and relative clonal abundance

Vector Integration Site Analysis - full report

## Supplemental Figure 1. Growth Curves.

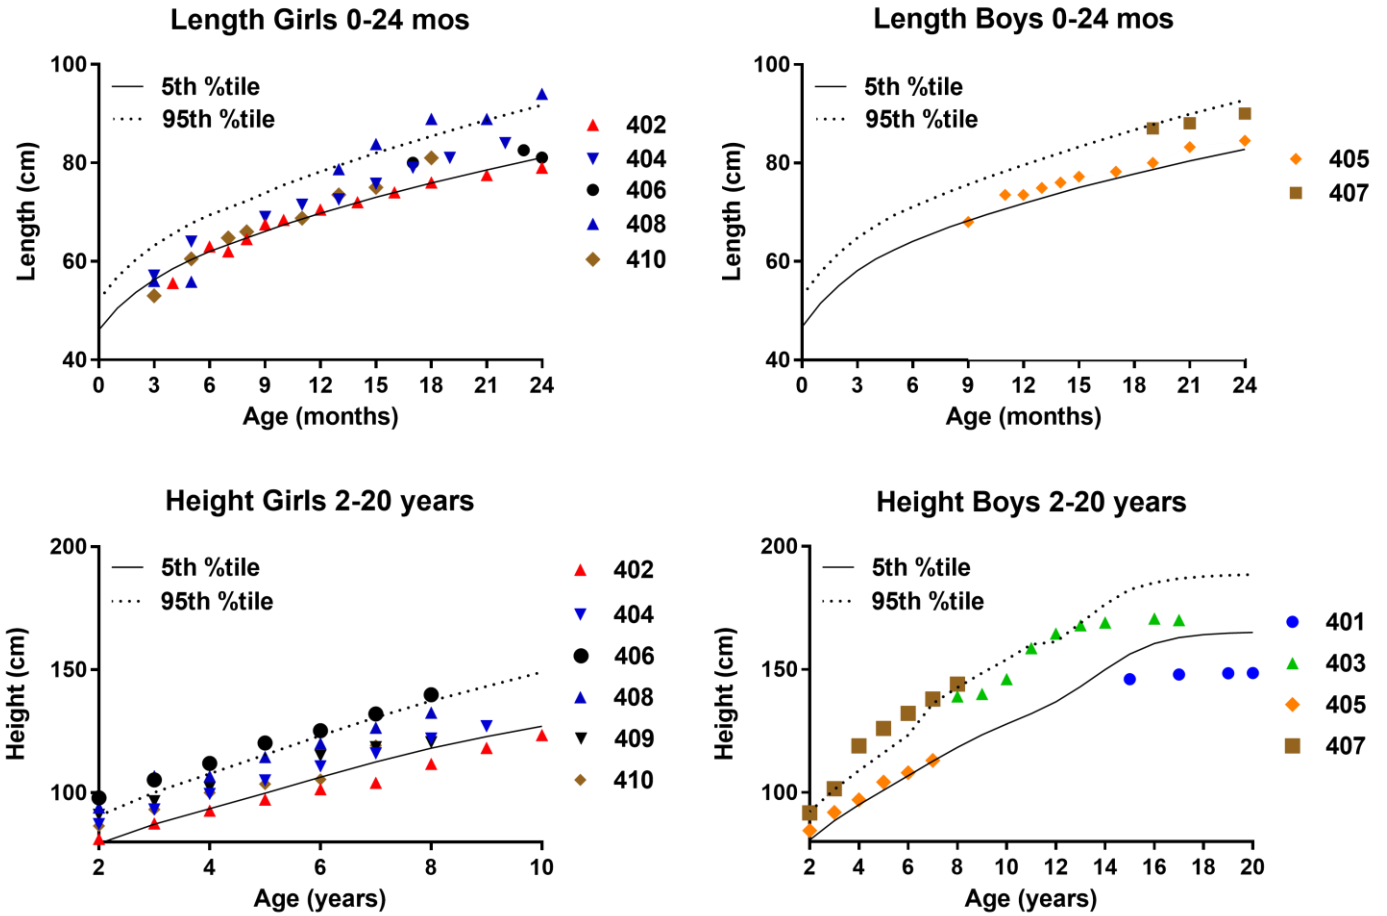

**Supplemental Figure 1. Growth Curves.** Patient length (0-24 months) or height (2-20 years) measured at clinic visits are shown compared to age-related normal ranges. Black line is 5<sup>th</sup> and dashed line is 95<sup>th</sup> percentiles, based on Centers for Disease Control and Prevention Clinical Growth Charts.

## Supplemental Figure 2. Granulocyte VCN vs Shannon Diversity Index

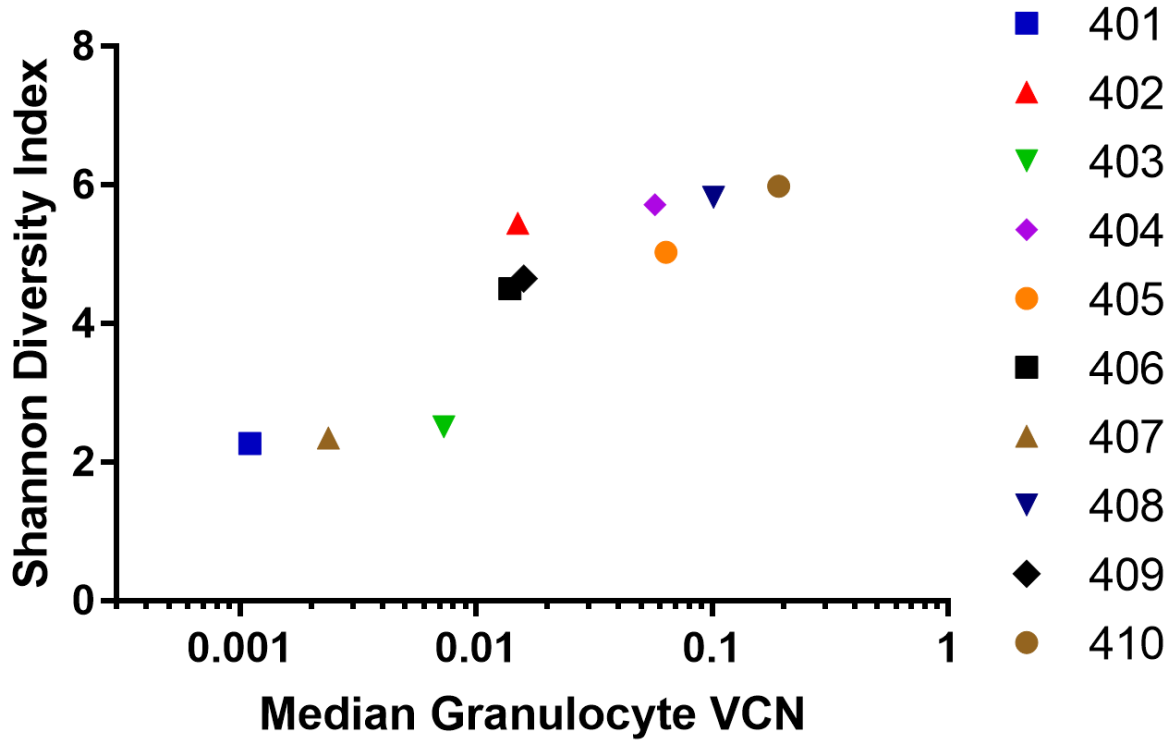

**Supplemental Figure 2.** Granulocyte VCN vs. Shannon Diversity Index. The Shannon Diversity Index for the unique vector integration sites in each subject are plotted against the mean of the vector copy number (VCN) values in their granulocyte samples from 24 months after gene therapy through follow-up.

Supplemental Figure 3. Unique Vector Integration Sites in each Patient

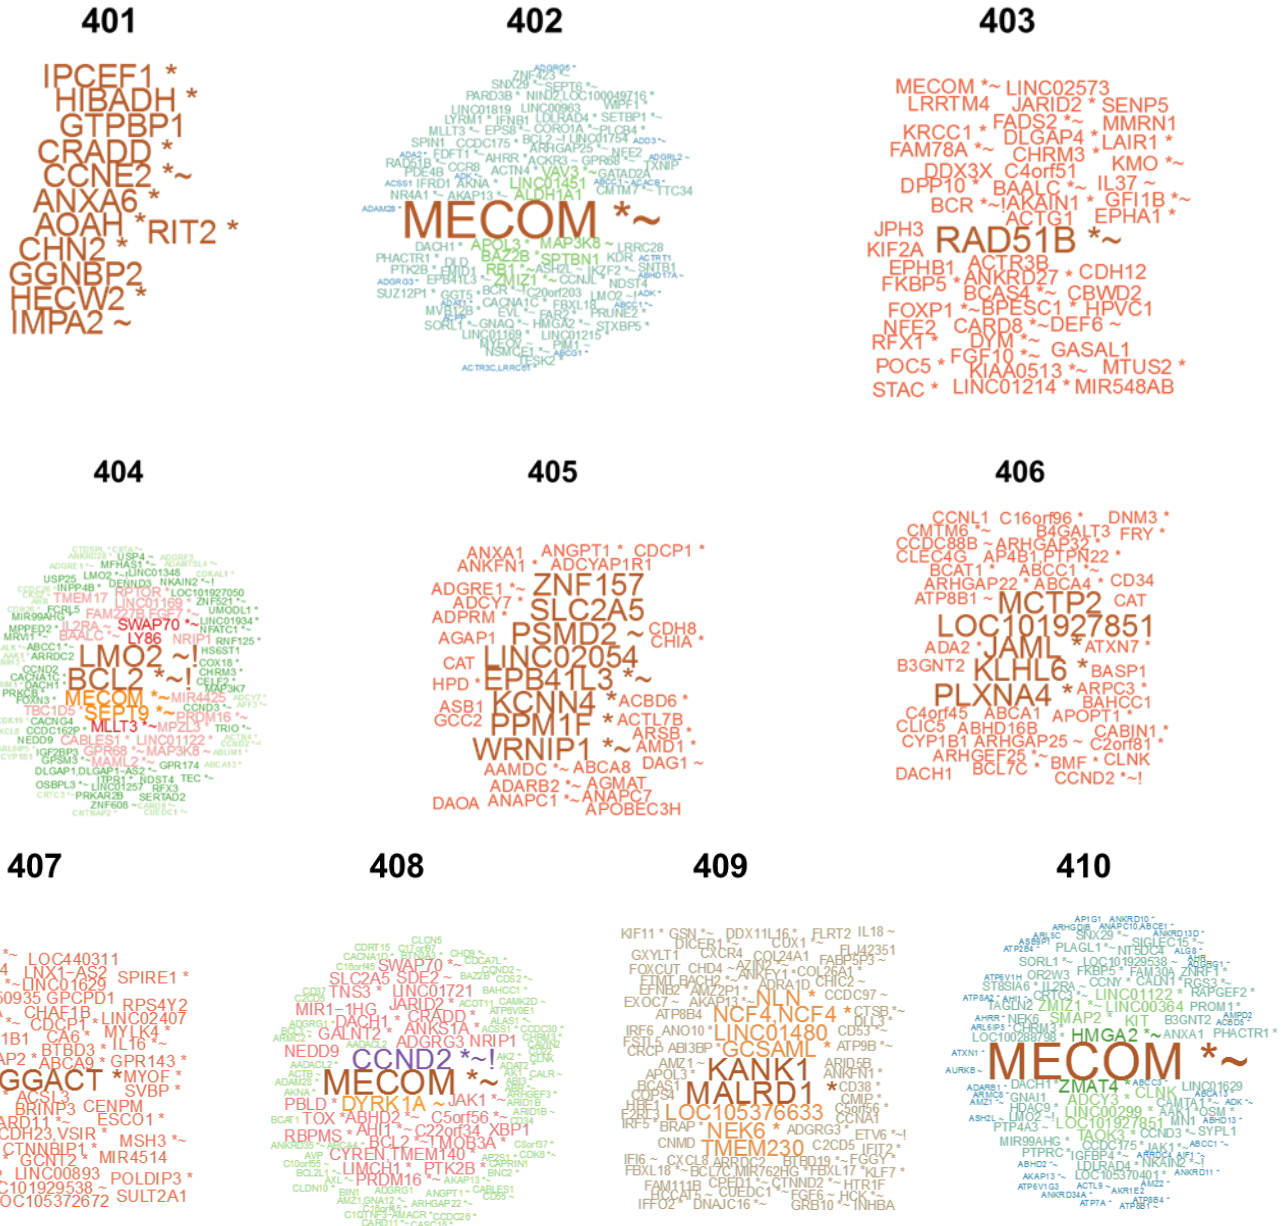

Supplemental Figure 3. Unique Vector Integration Sites in each Patient. The relative sizes of the gene names indicate their relative abundance. The asterisk indicates integration within the transcription unit of the named gene. The tilde indicates present in a broad list of cancer-associated gene (allOnco). The exclamation mark indicates gene associated with a list of 38 human lymphoma-associated genes. Gene lists: <http://www.bushmanlab.org/links/genelists>

**Supplemental Figure 4. Analysis of clones with MECOM-adjacent integrants.**

Each patient in the study has two PBMC time points which we will call early and late. The matrix below shows the number of early and late sites near MECOM.

|           | <u>Early</u> | <u>Late</u> |
|-----------|--------------|-------------|
| Not MECOM | 3172         | 2384        |
| MECOM     | 23           | 29          |

A Fishers two-sided test of this matrix yields a p-value of 0.068 and a one-sided test yields a p-value of 0.043 (later time points have more MECOM sites).

One MECOM clone expanded in frequency between the early and late PBMC samples. This can be seen graphically below. This version considers all MECOM clones with sufficient replicate level data (> 50 cells per replicate). Only samples with more than 50 inferred cells (all replicates combined) were considered.

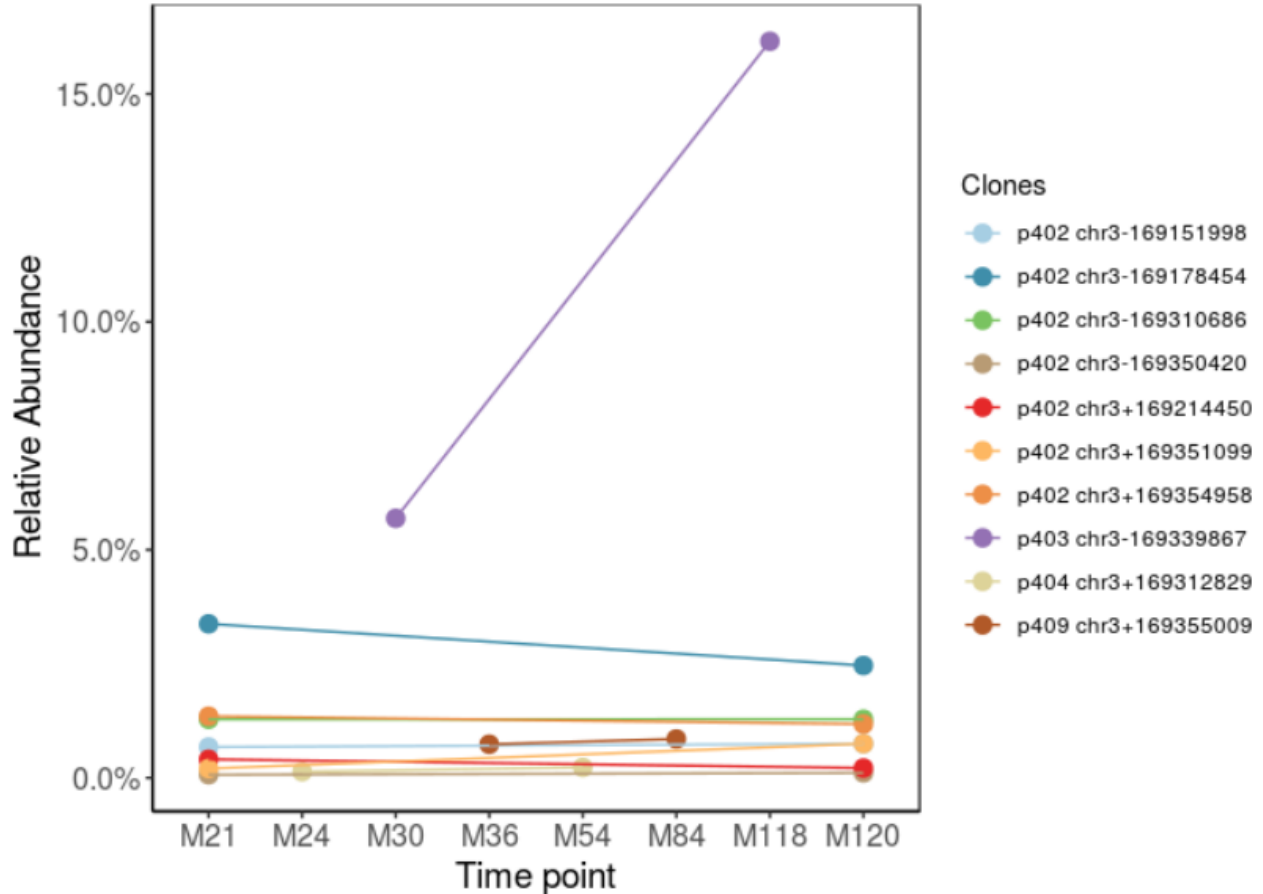

This expansion is not due to a single replicate based on analysis which compares the means of replicate relative abundances between early and later time points. The expanding clone in p403 yielded a significant Wilcox p-value (0.012).

**Supplemental Figure 5.** Median absolute lymphocyte counts (ALC) versus (A) median PBMC ADA enzyme activity and (B) age at gene therapy. (A) The median absolute lymphocyte counts measured in patients beyond two years after GT are plotted against their median PBMC ADA activity. (B) The median absolute lymphocyte counts measured in patients beyond two years after GT are plotted against the patients' ages at the time of GT.

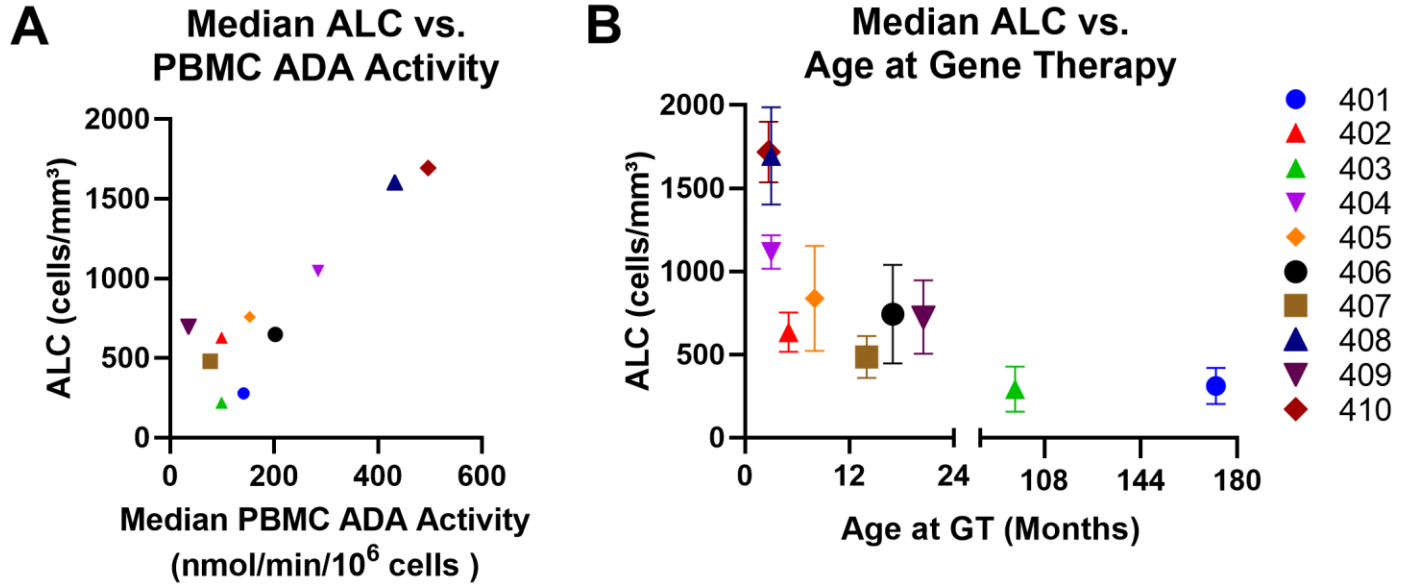

**Supplemental Figure 6.** Lack of correlation of TCR repertoire diversity at t1 vs. t2.

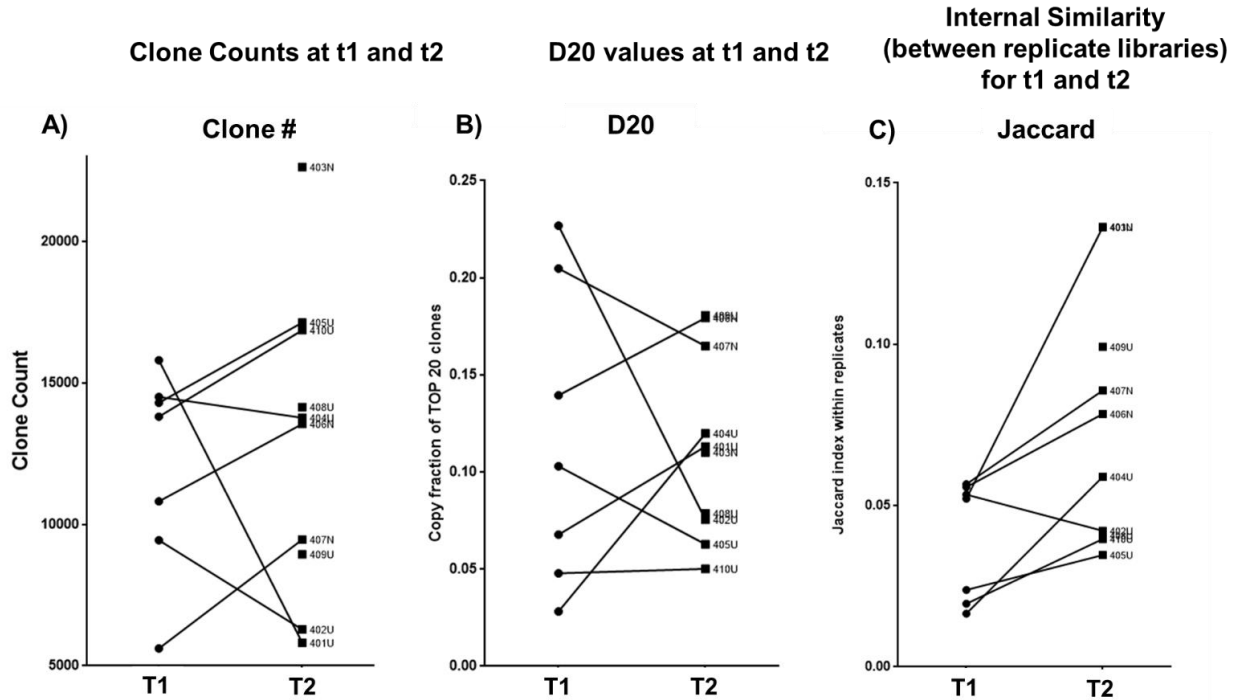

**TCR data analysis methods.** Raw reads from the Illumina MiSeq were processed as described previously.<sup>24</sup> IgBLAST v1.17.0 [10.1093/nar/gkt382] was used to annotate TRBV- and TRBJ-genes which were then imported into ImmuneDB v0.29.9 [10.3389/fimmu.2018.02107] for clonal inference and downstream analysis. Sequences sharing the same V-gene, J-gene, CDR3 length, and CDR3 amino-acid sequence were grouped into clones. Sequences with only one copy in each subject were excluded from clones to avoid the inference of spurious clones due to sequencing errors. Raw sequencing data are available on SRA under accession number PRJNA716857.

**Results:** To determine if diversity of the repertoire at t1 correlated with engraftment diversity at t2, we studied seven patients in whom paired data were available in detail. Lines connect samples from different time points from the same subject. **(A).** Clone count per sample vs. time point. **(B).** The D20 index is the sum of sequence copies in the top twenty ranked clones divided by all of the sequence copies in the library. The D20 serves as a metric of the contribution of very large clones to the overall repertoire. **(C).** Jaccard Index (fraction of overlapping clones divided by the total unique clones) in replicate sequencing libraries generated from each sample, which are separately amplified from gDNA. The Jaccard index between replicate libraries from the same sample correlates with the fraction of large clones that are readily resampled.

**Supplemental Figure 7.** *Correlation of TCR Repertoire Diversity and Gene Marking (VCN) in PBMC and Granulocytes.* The diversity of TCR repertoire was examined based on the number of unique TCR sequence clones or using the Shannon Diversity Index or the Chao estimator of diversity and correlated to the median VCN in each subject's PBMC or granulocytes 2 years and later after gene therapy. While the PBMC VCN did not correlate (A), there were non-significant trends between the granulocyte VCN and the clone # (B), the Shannon Diversity Index (C) and the Chao Diversity Index (D).

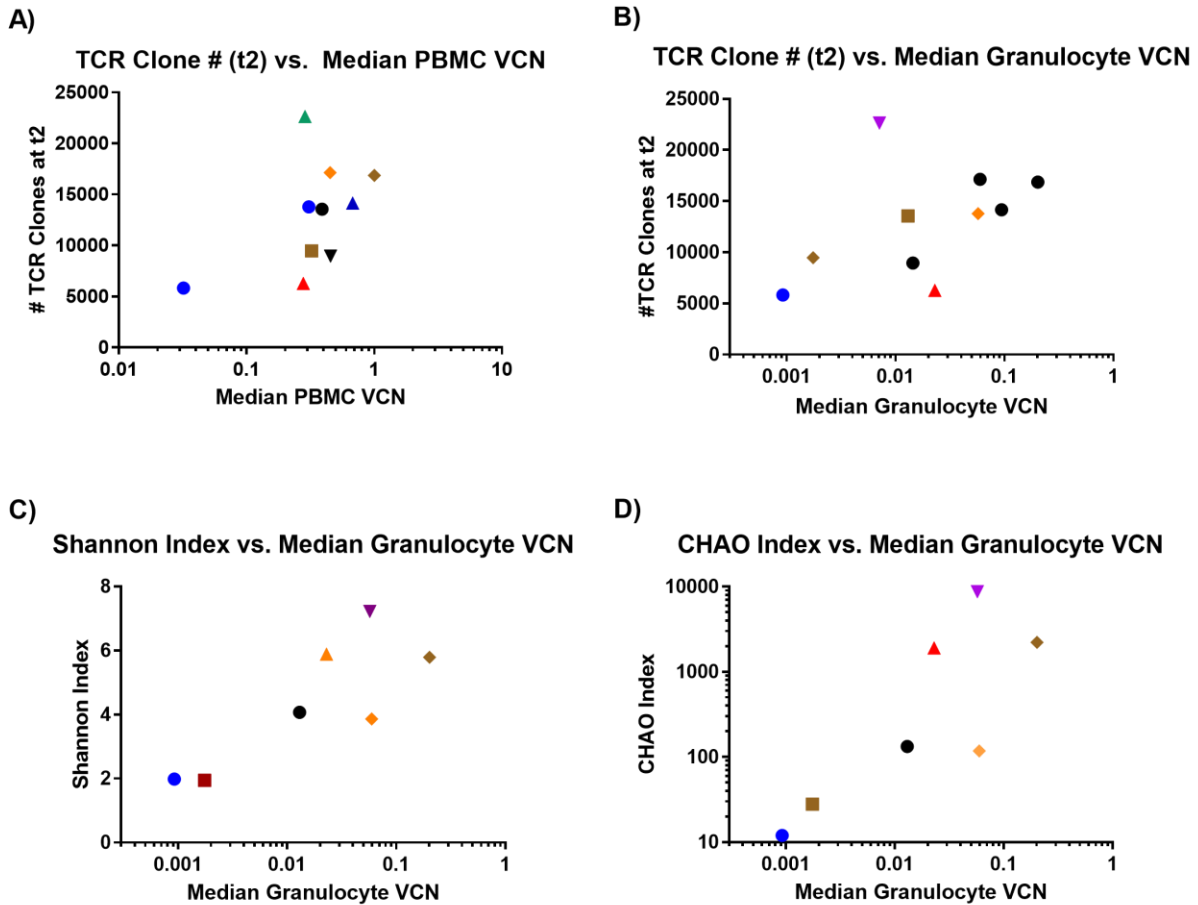



**Supplemental Figure 8.** *Correlation between Subject Age and Clone Count.*

The number of TCR clones per sample did not correlate with age at either time point. ( $p > 0.05$  by Spearman correlation; N.S. = not significant).

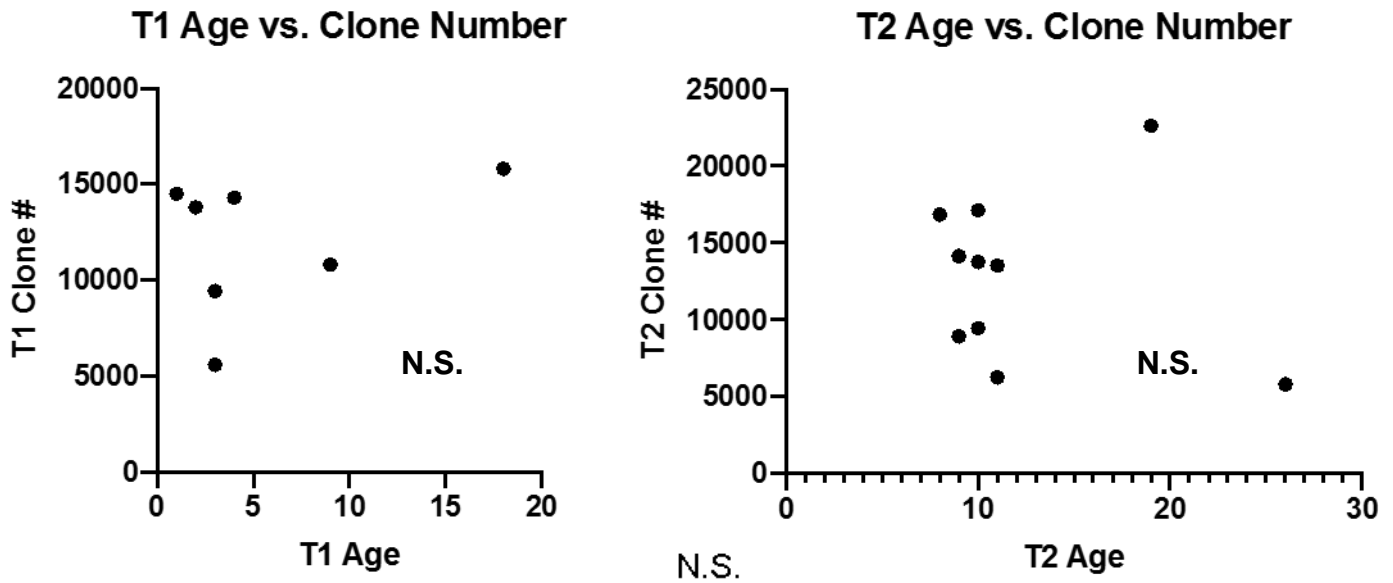

## **SUPPLEMENTAL TABLES**

### **Supplemental Table 1.** MND ADA Vector Integration Site Data (Gene Details)

- A. Clones at >20% frequency.
- B. Clones with integrants near retroviral common integration site proto-oncogenes (LMO2, IKZF1, CCND2, HMGA2 or MECOM).

### **Supplemental Table 2.** Coefficient of Variation (sd/mean) for Lymphocyte Subsets.

### **Supplemental Table 3.** Vaccine administrations and titer responses

### **Supplemental Table 4.** CD34+ cell dose, cell product vector copy number, and busulfan conditioning intensity.

### **Supplemental Table 5.** Statistical table on cell dose and AUC correlations with granulocyte VCN.

**Supplemental Table 1A. MND ADA Vector Integration Site Data (Gene Details)**

| Patient | Time (Mo) | VCN   | Unique Int | Chao 1 | Shannon | >20% Frequency Clones   |                        |
|---------|-----------|-------|------------|--------|---------|-------------------------|------------------------|
|         |           |       |            |        |         |                         |                        |
| 401     | 24        | 0.010 | 9          | 12     | 1.98    | CRADD* chr12-93739144   | MEX3B* chr15-82018028  |
|         | 82        | 0.105 | 27         | 50     | 2.27    |                         |                        |
| 402     | 21        | 0.742 | 729        | 1,909  | 5.89    |                         |                        |
|         | 120       | 0.476 | 430        | 1,100  | 5.45    |                         |                        |
| 403     | 30        | 0.195 | 26         | 33     | 2.54    | PPP1R1A* chr12+54304228 |                        |
|         | 118       | 0.545 | 47         | 72     | 2.51    |                         |                        |
| 404     | 24        | 0.686 | 1,725      | 8,750  | 7.22    |                         |                        |
|         | 54        | 0.540 | 353        | 1,573  | 5.72    |                         |                        |
| 405     | 42        | 0.490 | 67         | 118    | 3.86    |                         |                        |
|         | 60        | 0.496 | 225        | 675    | 5.03    |                         |                        |
| 406     | 24        | 0.172 | 74         | 133    | 4.07    |                         |                        |
|         | 84        | 0.483 | 196        | 384    | 4.58    |                         |                        |
| 407     | 24        | 0.401 | 25         | 28     | 1.94    | CA6* chr1+8947510       | FGF14* chr13+100586636 |
|         | 96        | 0.519 | 50         | 221    | 2.35    | FGF14* chr13+100586636  | ZDHC3* chr3+45106737   |
| 408     | 42        | 1.240 | 114        | 465    | 4.65    |                         |                        |
|         | 84        | 1.280 | 373        | 1113   | 5.82    |                         |                        |
| 409     | 36        | 0.287 | 73         | 191    | 4.02    |                         |                        |
|         | 84        | 0.627 | 247        | 701    | 4.59    |                         |                        |
| 410     | 24        | 1.130 | 342        | 2,220  | 5.79    |                         |                        |
|         | 72        | 0.91  | 442        | 2,068  | 5.98    |                         |                        |

**Supplemental Table 1B. MND ADA Vector Integration Site Data (Gene Details)**

| Patient | Time (Mo) | VCN   | Near Retroviral Common Integration Site Proto-Oncogenes (LMO2, IKZF1, CCND2, HMGA2 or MECOM) |                  |                                                            |                                                          |                                            |                 |
|---------|-----------|-------|----------------------------------------------------------------------------------------------|------------------|------------------------------------------------------------|----------------------------------------------------------|--------------------------------------------|-----------------|
| 401     | 24        | 0.010 | No                                                                                           |                  |                                                            |                                                          |                                            |                 |
|         | 82        | 0.105 | No                                                                                           |                  |                                                            |                                                          |                                            |                 |
| 402     | 21        | 0.742 | MECOM* (1) 3.6%                                                                              | MECOM* (2) 1.25% | MECOM* (3) 1.27%                                           |                                                          |                                            |                 |
|         | 120       | 0.476 | MECOM* (1) 2.5%                                                                              | MECOM* (2) 1.25% | MECOM* (3) 1.24%                                           |                                                          |                                            |                 |
| 403     | 30        | 0.195 | MECOM* 5%                                                                                    |                  |                                                            |                                                          |                                            |                 |
|         | 118       | 0.545 | MECOM* 16.5%                                                                                 |                  |                                                            |                                                          |                                            |                 |
| 404     | 24        | 0.686 | No                                                                                           |                  |                                                            |                                                          |                                            |                 |
|         | 54        | 0.540 | No                                                                                           |                  |                                                            |                                                          |                                            |                 |
| 405     | 42        | 0.490 | No                                                                                           |                  |                                                            |                                                          |                                            |                 |
|         | 60        | 0.496 | LMO2* 0.25%                                                                                  |                  |                                                            |                                                          |                                            |                 |
| 406     | 24        | 0.172 | No                                                                                           |                  |                                                            |                                                          |                                            |                 |
|         | 84        | 0.483 | No                                                                                           |                  |                                                            |                                                          |                                            |                 |
| 407     | 24        | 0.401 | No                                                                                           |                  |                                                            |                                                          |                                            |                 |
|         | 96        | 0.519 | No                                                                                           |                  |                                                            |                                                          |                                            |                 |
| 408     | 42        | 1.240 | LMO2* (1) 0.74%                                                                              | MECOM* (1) 1.4%  | MECOM* (2) 0.74%                                           | No                                                       | No                                         |                 |
|         | 84        | 1.280 | No                                                                                           | No               | MECOM* (2) 0.8%<br>MECOM* (3) 0.24%<br>MECOM* (4, 5) 0.24% | LMO2* (2) 0.4%                                           | HMGA2* 0.24%                               |                 |
| 409     | 36        | 0.287 | LMO2* (1) 0.73%                                                                              | No               | MECOM* 0.73%                                               |                                                          |                                            |                 |
|         | 84        | 0.627 | No                                                                                           | LMO2* (2) 0.12%  | MECOM* 0.85%                                               |                                                          |                                            |                 |
| 410     | 24        | 1.130 | LMO2* (1) 0.52%                                                                              | LMO2* (2) 0.26%  | HMGA2* (1) 0.26%                                           | No                                                       | No                                         | No              |
|         | 72        | 0.91  | No                                                                                           | No               | No                                                         | HMGA2* (2) 0.75%<br>HMGA2* (3) 0.19%<br>HMGA2* (4) 0.38% | MECOM* (1,2) 0.56%<br>MECOM* (3,4,5) 0.38% | LMO2* (3) 0.19% |

**Supplemental Table 2. Coefficient of Variation (sd/mean) for Lymphocyte Subsets.**

| Patient       | 401   | 402   | 403   | 404   | 405   | 406   | 407   | 408   | 409   | 410   | Krishnamoorthy<br>and.Lee test |
|---------------|-------|-------|-------|-------|-------|-------|-------|-------|-------|-------|--------------------------------|
| CD3+          | 0.399 | 0.172 | 0.553 | 0.486 | 0.205 | 0.481 | 0.359 | 0.194 | 0.845 | 0.226 | 0.099                          |
| CD4+          | 0.340 | 0.135 | 0.544 | 0.241 | 0.194 | 0.372 | 0.287 | 0.159 | NA    | 0.255 | 0.023                          |
| CD8+          | 0.637 | 0.223 | 0.573 | 0.318 | 0.356 | 0.542 | 0.378 | 0.212 | 1.139 | 0.321 | 0.222                          |
| CD19+         | 0.413 | 0.359 | 0.890 | 0.397 | 0.247 | 0.709 | 0.509 | 0.291 | 0.256 | 0.259 | 0.106                          |
| CD16/56 0.150 | 0.473 | 0.570 | 0.421 | 0.592 | 0.366 | 0.499 | 0.317 | 0.561 | 0.330 | 0.381 |                                |
| CD4+CD45RA+   | 0.471 | NA    | 0.943 | 0.170 | NA    | 0.447 | 0.472 | 0.051 | 0.000 | 0.500 | 0.298                          |

### Supplemental Table 3

#### Vaccination results

After cessation of immunoglobulin replacement therapy (IgRT), patients were administered multiple vaccines, including Diphtheria/Tetanus/Pertussis (DTaP), *Haemophilus influenza* (Hib), meningococcus, pneumococcus, Varicella-Zoster Virus and annual influenza A. Patients 404 and 410 developed positive immune responses to immunizations, whereas 405 and 408 were not tested (**Supplemental Table 3**, below) . Patient 403 was administered three rabies vaccinations while continuing IgRT under a research trial (NCT #00023504) which was testing whether the rabies vaccine as a neo-antigen could assess humoral immunity for patients receiving immunoglobulin replacement. The antibody titer responses were below the detection limit (<0.1 IU/mL) and IgRT was continued. Patient 402 received a DTaP vaccination during an unsuccessful trial off IgRT. All the patients on IgRT received annual influenza vaccination after GT.

**Supplemental Table 3. Vaccine administrations and titer responses**

| UPN | Vaccinations                                                                                                                           | Administration Date(s)                                                                                                                                                                                                                                                              | Titer Responses                                                                                                                                                                                                                |
|-----|----------------------------------------------------------------------------------------------------------------------------------------|-------------------------------------------------------------------------------------------------------------------------------------------------------------------------------------------------------------------------------------------------------------------------------------|--------------------------------------------------------------------------------------------------------------------------------------------------------------------------------------------------------------------------------|
| 402 | DTaP                                                                                                                                   | Unknown                                                                                                                                                                                                                                                                             |                                                                                                                                                                                                                                |
| 403 | 3 x Rabies                                                                                                                             | 2017                                                                                                                                                                                                                                                                                | 5/22/17 - Rabies: <0.1 IU/mL                                                                                                                                                                                                   |
| 404 | 3 x DTaPs<br>3 x IPV<br>1 x Haemophilus B<br>Influenza<br>2 x Hepatitis B<br>2 x Prevnar 13<br>Varicella and MMR<br>Influenza (yearly) | 2012<br>2012<br>2012<br>2012<br>2012<br>2014<br>2014, -15, -16, -17, -18,                                                                                                                                                                                                           | 9/16/14 - Tetanus IgG Ab:<br>5.20                                                                                                                                                                                              |
| 405 | Influenza (yearly)<br><br>Influenza<br>Hepatitis A<br>Hepatitis B<br>HPV<br>MMR<br>Pneumococcal<br>Polio<br>TDAP/TD<br>Varicella       | 9/18/14, 9/15/15, 2016, 2/23/17, 3/14/18,<br>11/19/19<br>9/18/14<br>7/29/19, 2/21/20<br>7/29/19, 8/30/19, 7/7/20<br>7/29/19, 9/20/19, 7/7/20<br>9/20/19, 2/21/20<br>11/19/19, 2/21/20, 7/7/20<br>7/29/19, 8/30/19, 11/19/19, 7/7/20<br>7/29/19, 8/30/19, 7/7/20<br>9/20/19, 2/21/20 | Not done                                                                                                                                                                                                                       |
| 408 | DTaP<br>IPV<br>Influenza (yearly)                                                                                                      | 2016<br>2016<br>10/12/17, 1/3/19                                                                                                                                                                                                                                                    | Not done.                                                                                                                                                                                                                      |
| 409 | Varicella                                                                                                                              | 2015                                                                                                                                                                                                                                                                                | Not done.<br>Varicella followed post-<br>vaccination. Hospitalized for<br>IV acyclovir. Resolved.                                                                                                                              |
| 410 | DTaP<br>IPV<br>Hepatitis A<br>Hepatitis B<br>PCV13<br>Polio<br>Varicella<br>Influenza (yearly)<br>Measles                              | 9/14, 10/16<br>9/14<br>2014<br>2014<br>2014<br>10/16<br>5/18<br>2014, -15, -16, -17,-18, -19, 2020<br>2018                                                                                                                                                                          | 8/3/15 – Streptococcus<br>Pneumoniae IgG Ab: >2.0<br>mcg/mL (14/23 serotypes)<br>Haemophilus Influenza B IgG<br>Ab: 0.82 mg/L<br>Tetanus IgG Ab: 0.47<br>Poliovirus Type 1,2,3 Ab ≥1:8<br>Not tested<br>IgG antibody index-7.1 |

**Supplementary Table 4. *TRBV Sequencing Metadata***

| sample_id | # reps | input DNA    |        | clones | cdr3_num |          |
|-----------|--------|--------------|--------|--------|----------|----------|
|           |        | (ng) per rep | copies |        | _nts     | in_frame |
| 401U-11yr | 2      | 200          | 319219 | 5813   | 44.84    | 0.81     |
| 401U-36mo | 2      | 200          | 261000 | 15807  | 44.27    | 0.83     |
| 402U-10yr | 2      | 200          | 336336 | 6281   | 44.07    | 0.78     |
| 402U-30mo | 2      | 200          | 269031 | 9438   | 44.00    | 0.80     |
| 403N-11yr | 2      | 200          | 316299 | 22641  | 43.97    | 0.81     |
| 404U-21m  | 2      | 200          | 255359 | 14512  | 43.90    | 0.78     |
| 404U-9yr  | 2      | 200          | 289671 | 13773  | 44.03    | 0.78     |
| 405U-30mo | 2      | 200          | 286665 | 14303  | 44.32    | 0.83     |
| 405U-8yr  | 2      | 200          | 288019 | 17136  | 44.23    | 0.83     |
| 406N-30mo | 2      | 200          | 291603 | 10817  | 43.70    | 0.79     |
| 406N-9yr  | 2      | 200          | 285613 | 13554  | 43.75    | 0.79     |
| 407N-21mo | 2      | 200          | 256170 | 5614   | 44.56    | 0.76     |
| 407N-9yr  | 2      | 200          | 295548 | 9464   | 44.40    | 0.79     |
| 408U-9yr  | 2      | 200          | 257551 | 14148  | 44.17    | 0.80     |
| 409U-8yr  | 2      | 200          | 337529 | 8938   | 44.33    | 0.79     |
| 410U-21mo | 2      | 200          | 288414 | 13811  | 44.37    | 0.78     |
| 410U-7yr  | 2      | 200          | 311300 | 16869  | 44.17    | 0.80     |

Shown are the sample IDs which include the subject ID and time point. The earlier time point after gene therapy is t1 and the most recent sample corresponds to t2. T cell receptor rearrangements (beta chain) were amplified from genomic DNA extracted from bulk PBMCs. Data are pooled from two separately amplified replicates (reps). The amount of input DNA was 200 nanograms per replicate. Copies indicate the number of valid reads, clones are sequences that share the same TRBV, TRBJ, have the same length third complementarity determining region (CDR3) and have identical CDR3 amino acid sequences. Each clone is counted only once if it is present in more than one replicate. Sequences with fewer than two copies at the subject level are excluded from the clone count to reduce the effects of sequencing error. The CDR3 length is given in nucleotides (num\_nts). The final column, in\_frame, indicates the fraction of unique sequences with productive rearrangements (those that are in the correct reading frame and have no termination codons.)



## Supplemental Tables 5 and 6

### Correlation of levels of engraftment of gene-corrected cells (granulocyte VCN) with transplant factors – drug product cell dose and VCN, busulfan intensity

To assess the effects of important parameters of the GT transplant on the resulting granulocyte VCN, we examined CD34+ cells dose/kg, VCN in the CD34+ cell product, and the intensity of cytoreductive conditioning, based on measured busulfan AUC, as reported by Shaw et al (13) (**Supplemental Table 4**, below). Median VCN in granulocytes per subject correlated significantly with the CD34+ cell dose delivered ( $r_s = 0.67$ ,  $p = 0.04$ ) (**Supplemental Table 5**, below). To model the dose of *gene-modified* CD34+ cells delivered, the CD34+ cell dose/kg was multiplied by the VCN in each cell product. This computed dose of gene-modified cells also correlated with the granulocyte VCN, but did not reach statistical significance. ( $r_s = 0.61$ ,  $p = 0.07$ ). To determine if the intensity of cytoreductive conditioning the patients received, based on the measured busulfan levels, influenced engraftment of the gene-modified cells, the dose of transduced cells delivered was multiplied by the busulfan AUC for that patient. This composite index of cell and conditioning intensity correlated significantly with the median neutrophil VCN ( $r_s = 0.80$ ,  $p = 0.01$ ). These findings suggest that cell dose, VCN in the drug product and intensity of cytoreductive conditioning are each important factors to achieve optimal engraftment of gene-corrected HSC.

**Supplemental Table 5.** CD34+ cell dose, cell product vector copy number, and busulfan conditioning intensity.

| <b>Patient</b> | <b>CD34+ cells/kg*</b> | <b>VCN*</b>  | <b>CD34+ Cells/kg<br/>x VCN</b> | <b>Busulfan AUC*<br/>(<math>\mu\text{mol/L}\cdot\text{min}</math>)</b> | <b>CD34+ Cells/kg<br/>x VCN<br/>x Busulfan AUC</b> |
|----------------|------------------------|--------------|---------------------------------|------------------------------------------------------------------------|----------------------------------------------------|
| <b>401</b>     | 0.6                    | 0.6          | 0.36                            | n.d.                                                                   | n.d.                                               |
| <b>402</b>     | 1.7                    | 0.71         | 1.21                            | 5437                                                                   | 6579                                               |
| <b>403</b>     | 0.92                   | 0.18         | 0.16                            | 3871                                                                   | 619                                                |
| <b>404</b>     | 7.1                    | 2.0          | 14.2                            | 3532                                                                   | 50,154                                             |
| <b>405</b>     | 7.62                   | 2.0          | 15.24                           | 5469                                                                   | 83,348                                             |
| <b>406</b>     | 8                      | 2.6          | 20.8                            | 2427                                                                   | 50,482                                             |
| <b>407</b>     | 5.6                    | 2.31         | 12.94                           | 3232                                                                   | 41,822                                             |
| <b>408</b>     | 6.8                    | 2.68         | 18.2                            | 5344                                                                   | 97,261                                             |
| <b>409</b>     | 2.9                    | 1.22         | 3.54                            | 5608                                                                   | 19,852                                             |
| <b>410</b>     | 8.4                    | 2.38         | 20.0                            | 6714                                                                   | 134,280                                            |
| <b>Median</b>  | <b>4.964</b>           | <b>1.668</b> | <b>10.665</b>                   | <b>4626</b>                                                            | <b>53091.08</b>                                    |

\*From Table2, Shaw et al JCI 2017.

**Supplemental Table 6.** *Correlations between cell dose and AUC with granulocyte VCN.*

| <b>Median VCN Correlates</b> | <b>Spearman Correlation</b> | <b>P Value</b> |
|------------------------------|-----------------------------|----------------|
| Median CD34+/kg              | 0.673                       | 0.039          |
| Median CD34+/kg x VCN        | 0.612                       | 0.066          |
| Median CD34+/kg x VCN x AUC  | 0.088                       | 0.014          |

# Analysis of integration site distributions and relative clonal abundance for subject p401

*November 02, 2020*

## Contents

|                                                                                                    |           |
|----------------------------------------------------------------------------------------------------|-----------|
| <b>Summary</b>                                                                                     | <b>2</b>  |
| Is there a rich population of progenitor cells delivering mature cells to the periphery? . . . . . | 2         |
| Do any cell clones account for more than 20% of all clones? . . . . .                              | 2         |
| Are any cell clones increasing in proportion over time? . . . . .                                  | 3         |
| <b>Introduction</b>                                                                                | <b>4</b>  |
| <b>Sample Summary</b>                                                                              | <b>5</b>  |
| <b>Tracking of clonal abundances</b>                                                               | <b>6</b>  |
| Relative abundance of cell clones . . . . .                                                        | 6         |
| Longitudinal behavior of major clones . . . . .                                                    | 8         |
| Integration sites near particular genes of interest . . . . .                                      | 9         |
| Sample relative abundance heatmap . . . . .                                                        | 10        |
| <b>What are the most frequently occurring gene types in the subject?</b>                           | <b>11</b> |
| <b>Multihits</b>                                                                                   | <b>12</b> |
| <b>Methods</b>                                                                                     | <b>13</b> |

# Summary

Is there a rich population of progenitor cells delivering mature cells to the periphery?

To provide a simple measure, we ask whether there are  $\geq 1000$  descendants of independent progenitors (i.e. unique integration sites) in minimally fractionated cell specimens (Whole blood, T cells, B cells, NK cells, Neutrophils, Monocytes and PBMC). Cell specimens that pass these criteria are operationally designated Rich.

| Time point | PBMC | Rich |
|------------|------|------|
| M24        | 9    | No   |
| M84        | 27   | No   |

Do any cell clones account for more than 20% of all clones?

For some trials, a reporting criteria is whether any cell clones expand to account for greater than 20% of all clones. The table below highlights samples with relative abundances  $\geq 20\%$  considering only samples with 50 or more inferred cells.

| IntSite        | Abundance | Relative abundance | time point | Cell type | Nearest gene | Distance (KB) | Nearest oncogene | Distance (KB) |
|----------------|-----------|--------------------|------------|-----------|--------------|---------------|------------------|---------------|
| chr15-82018028 | 86        | 29.7%              | M84        | PBMC      | MEX3B        | 23.70         | IL16             | 705.30        |

# Are any cell clones increasing in proportion over time?

The plot below details the longitudinal sample relative abundances of the most abundant 20 clones where only samples with 50 or more inferred cells are considered.

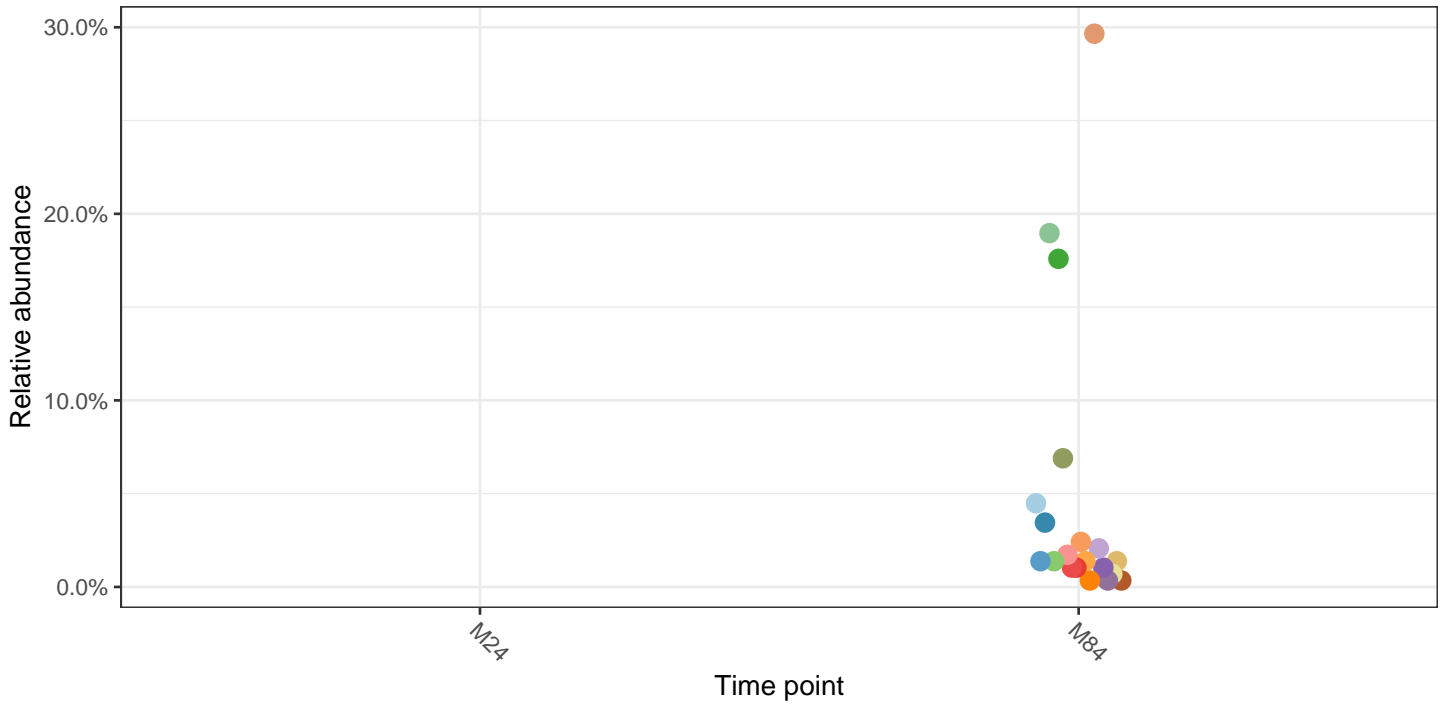

- | Clone                                                                         |                                                                             | Data source                                   |
|-------------------------------------------------------------------------------|-----------------------------------------------------------------------------|-----------------------------------------------|
| <span style="color: lightblue;">●</span> PBMC : ANXA6 *<br>chr5+151151775     | <span style="color: orange;">●</span> PBMC : LINC00365<br>chr13-30120155    | <span style="color: black;">●</span> Illumina |
| <span style="color: blue;">●</span> PBMC : CCNE2 *~<br>chr8+94895052          | <span style="color: orange;">●</span> PBMC : LINC02332<br>chr14+22557818    |                                               |
| <span style="color: darkblue;">●</span> PBMC : CHN2 *<br>chr7-29338509        | <span style="color: orange;">●</span> PBMC : LOC105376633<br>chr11+38157127 |                                               |
| <span style="color: lightgreen;">●</span> PBMC : CRADD *<br>chr12-93739144    | <span style="color: orange;">●</span> PBMC : MEX3B<br>chr15-82018028        |                                               |
| <span style="color: green;">●</span> PBMC : GGNBP2<br>chr17+36544381          | <span style="color: purple;">●</span> PBMC : MOB3A *<br>chr19-2085241       |                                               |
| <span style="color: darkgreen;">●</span> PBMC : HECW2 *<br>chr2+196253531     | <span style="color: purple;">●</span> PBMC : PLXDC2 *<br>chr10-19825627     |                                               |
| <span style="color: olive;">●</span> PBMC : IMPA2 ~<br>chr18+11948123         | <span style="color: purple;">●</span> PBMC : RIT2 *<br>chr18+42857081       |                                               |
| <span style="color: pink;">●</span> PBMC : INHBA,INHBA-AS1 *<br>chr7-41694914 | <span style="color: yellow;">●</span> PBMC : SSBP4 ~<br>chr19-18418061      |                                               |
| <span style="color: red;">●</span> PBMC : IPCEF1 *<br>chr6+154258876          | <span style="color: gold;">●</span> PBMC : STXBP4 *<br>chr17-55075874       |                                               |
| <span style="color: darkred;">●</span> PBMC : LINC-PINT *<br>chr7-130955551   | <span style="color: brown;">●</span> PBMC : ZNF432<br>chr19-52049219        |                                               |

# Introduction

The attached report describes results of analysis of integration site distributions and relative abundance for samples from gene therapy trials. For cases of gene correction in circulating blood cells, it is possible to harvest cells sequentially from blood to monitor cell populations. Frequency of isolation information can provide information on the clonal structure of the population. This report summarizes results for subject p401 over time points M24, M84 in UCSC genome draft .

The samples studied in this report, the numbers of sequence reads, recovered integration vectors, and unique integration sites available for this subject are shown below. We quantify population clone diversity using Gini coefficients, Shannon index, and UC50. The Gini coefficient provides a measure of inequality in clonal abundance in each sample. The coefficient equals zero when all sites are equally abundant (polyclonal) and increases as fewer sites account for more of the total (oligoclonal). Shannon index is another widely used measure of diversity and it accounts for both abundance and evenness of the integration events. Alternatively, the UC50 is the number of unique clones which make up the top 50% of the sample's abundance. For polyclonal samples, one may expect a low Gini coefficient, high Shannon Index, and high UC50 (proportional to the total number of unique sites identified in the sample).

Under most circumstances only a subset of sites will be sampled. We thus include an estimate of sample size based on frequency of isolation information from the SonicLength method (Berry, 2012). The 'S.chao1' column denotes the estimated lower bound for population size derived using Chao estimate (Chao, 1987). If sample replicates were present then estimates were subjected to jackknife bias correction.

We estimate the numbers of cell clones sampled using the SonicLength method (Berry, 2012); this is summarized in the column "Inferred cells". Integration sites were recovered using ligation mediated PCR after random fragmentation of genomic DNA, which reduces recovery biases compared with restriction enzyme cleavage. Relative abundance was not measured from read counts, which are known to be inaccurate, but from marks introduced into DNA specimens prior to PCR amplification using the SonicLength method PMID:22238265.

We quantify population diversity using Gini coefficients, Shannon index, and UC50. The Gini coefficient provides a measure of inequality in clonal abundance in each sample. The coefficient equals zero when all sites are equally abundant (polyclonal) and increases as fewer sites account for more of the total (oligoclonal). Shannon index is another widely used measure of diversity and it accounts for both abundance and evenness of the integration events. UC50 is the number of clones which make up the top 50% of the sample's abundance. For polyclonal samples, one may expect a low Gini coefficient, high Shannon Index, and high UC50 (proportional to the total number of unique sites identified in the sample).

Integration positions are reported with the format (nearest gene, chromosome, +/-, genomic position) where the nearest gene is the nearest transcriptional boundary to the integration position, '+' refers to integration in the positive orientation and '-' refers to integration in the reverse orientation. Reported distances are signed where where the sign indicates if integrations are upstream (-) or downstream (+, no sign) of the nearest gene. Nearest genes possess additional annotations described in the table below.

| Symbol | Meaning                                             |
|--------|-----------------------------------------------------|
| *      | site is within a transcription unit                 |
| ~      | site is within 50kb of a cancer related gene        |
| !      | nearest gene was associated with lymphoma in humans |

# Sample Summary

The table below provides population statistics for each analyzed sample. Occasionally multiple samples from the same cell fraction and time point are analyzed where only the sample with greatest number of inferred cells is considered in this report. Sample rows with NA listed in the TotalReads, InferredCells, UniqueSite and other columns represent samples which were analyzed but no integration sites were identified.

| GTSP     | dataSource | Timepoint | CellType | TotalReads | InferredCells | UniqueSites | Gini  | Chao1 | Shannon | Pielou | UC50 | Included | runDate    | VCN   |
|----------|------------|-----------|----------|------------|---------------|-------------|-------|-------|---------|--------|------|----------|------------|-------|
| GTSP3597 | Illumina   | M24       | PBMC     | 222,308    | 23            | 9           | 0.357 | 12    | 1.98    | 0.902  | 3    | yes      | 2020-10-28 | 0.010 |
| GTSP3598 | Illumina   | M84       | PBMC     | 1,001,982  | 290           | 27          | 0.712 | 50    | 2.27    | 0.689  | 3    | yes      | 2020-10-28 | 0.105 |



# Tracking of clonal abundances

## Relative abundance of cell clones

The relative abundances of cell clones is summarized in the stacked bar plots below. The cell fraction studied is named at the top of each plot and the time points are marked at the bottom. The different bars in each panel show the major cell clones, as marked by integration sites where the x-axis indicates time points and the y-axis is scaled by proportion of the total cells sampled. The top 10 most abundant clones from each cell type have been named by the nearest gene while the remaining sites are binned as low abundance (LowAbund; grey). The total number of genomic fragments used to identify integration sites are listed atop of each plot. These fragments are generated by restriction endonucleases in 454 sequencing experiments and by sonic shearing in Illumina sequencing experiments. Relative abundances are calculated using the total number of reads associated with clones in 454 sequencing experiments while the number of unique sonic breaks is used in Illumina sequencing experiments.

PBMC

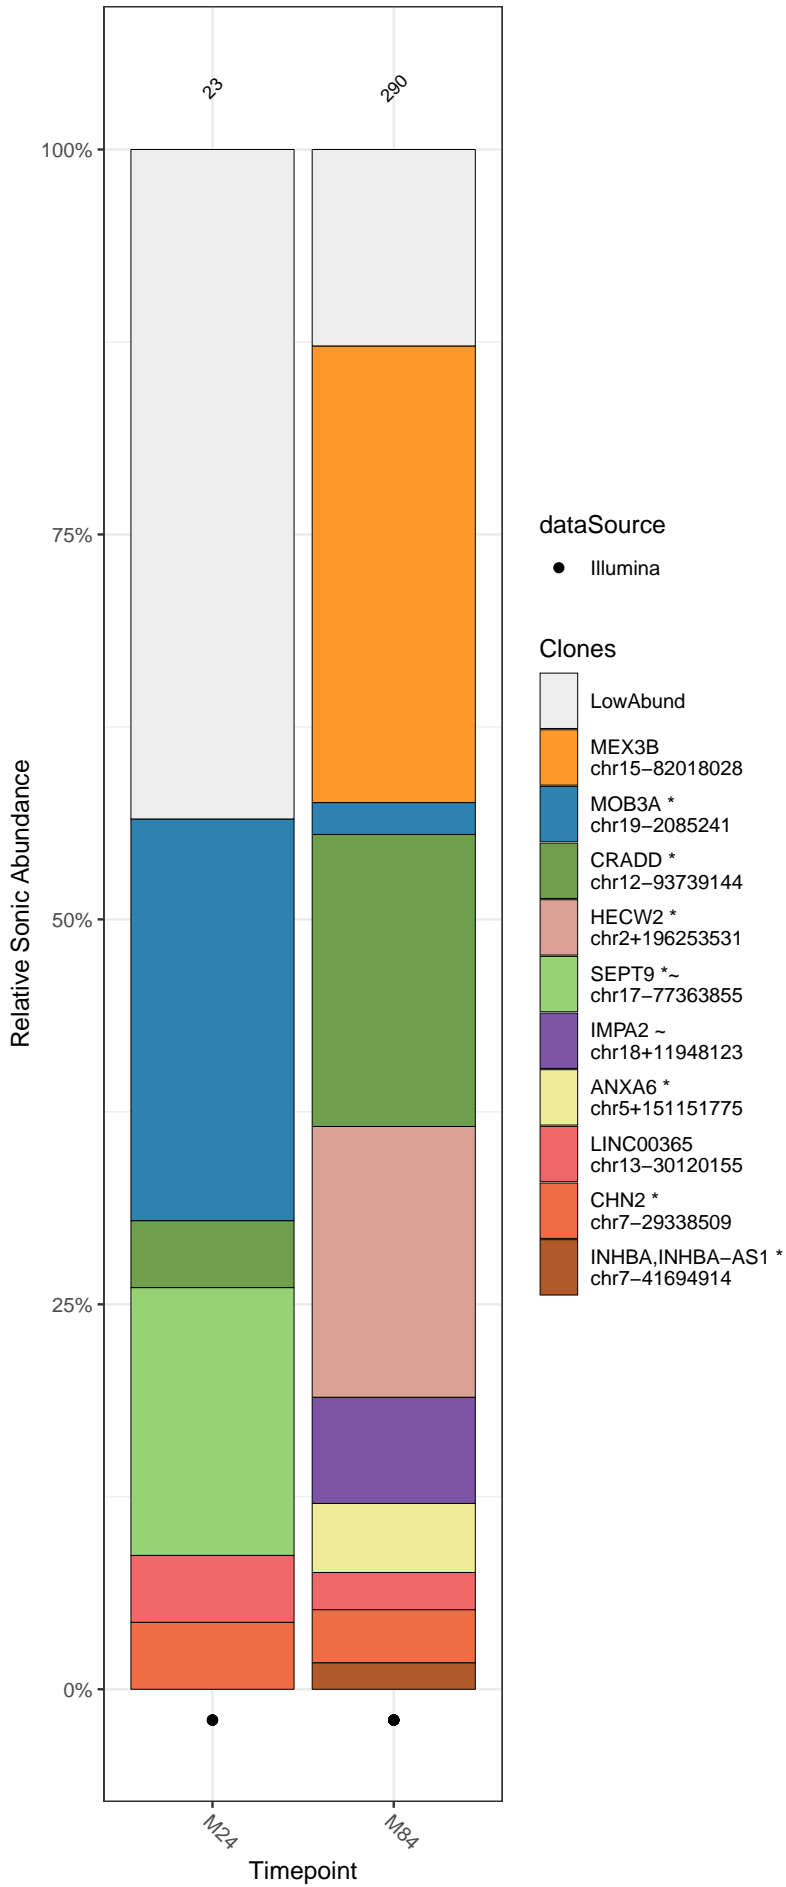

# Longitudinal behavior of major clones

When multiple time points are available, it is of interest to track the behavior of the most abundant clones across different cell types. A plot of the relative abundances of the most abundant 10 clones is shown below. For cases where only a single time point is available, the data is plotted as unlinked points.

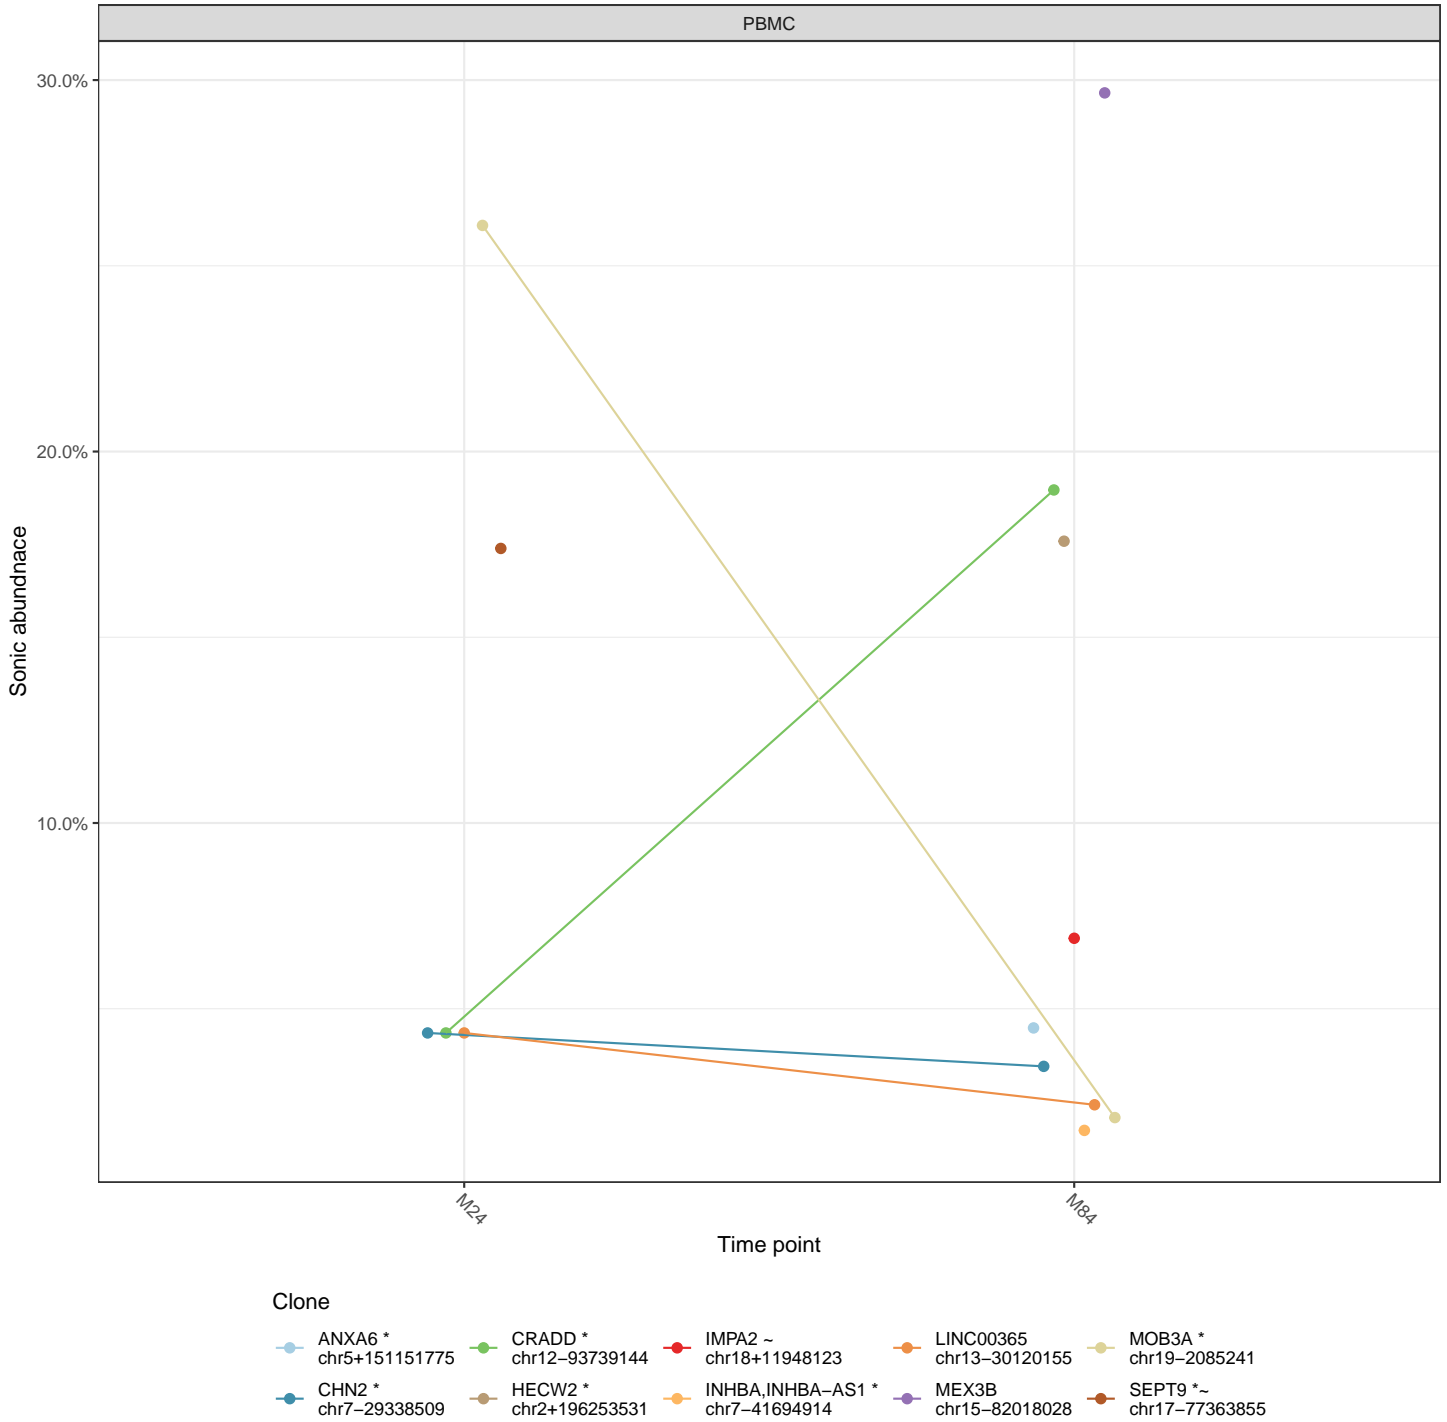

## Integration sites near particular genes of interest

Integration sites near genes that have been associated with adverse events are of particular interest. Below are longitudinal relative abundance plots that focus on the most abundant 5 clones whose nearest genes are LMO2, IKZF1, CCND2, HMGA2, and MECOM.

No integration sites were found near LMO2, IKZF1, CCND2, HMGA2 or MECOM

# Sample relative abundance heatmap

Alternatively, the relative abundances of the most abundant 10 clones from each cell sampled type can be visualized as a heat map.

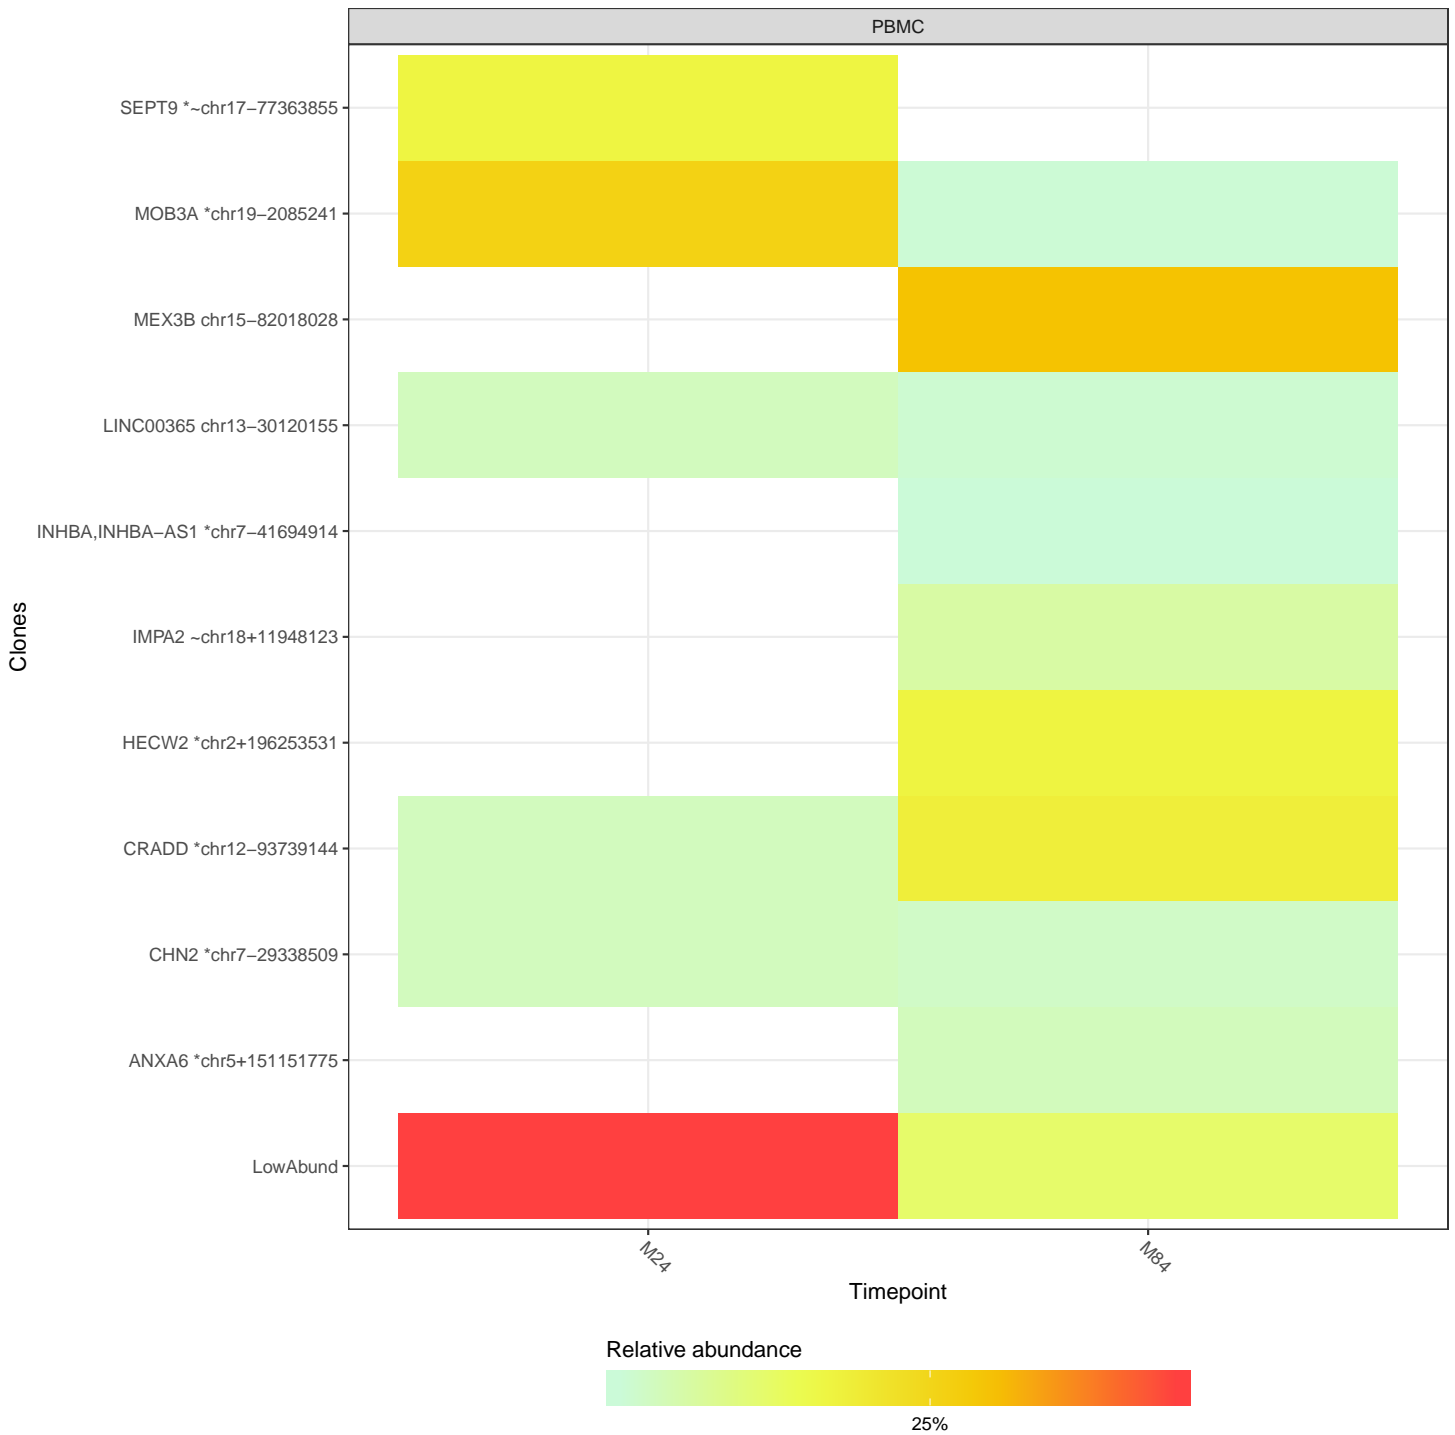

# What are the most frequently occurring gene types in the subject?

The word clouds below illustrate the nearest genes of the most abundant clones from each sample where the numeric ranges represent the upper and lower clonal abundances.

PBMC  
M24 1:6

RASGEF1B  
GTPBP1  
MOB3A \*  
SEPT9 \*~

PBMC  
M84 1:86

HECW2 \*  
MEX3B \*  
CRADD \*  
IMPA2 ~ LINC00325  
GUM1A ~ COM1 ~ PLNDC1

# Multihits

This analysis has been looking at integration sites that can be uniquely mapped. But it is also helpful to look at reads finding multiple equally good alignments in the genome which can be referred to as 'Multihits'. If an integration site occurred within a repeat element (i.e. Alus, LINE, SINE, etc), then it might be helpful to access those sites for potential detrimental effects. These collection of sequences are analyzed separately due to their ambiguity.

No sample contained a multihit grouping which exceeded 20% of the sample's inferred cells.

# Methods

All coordinates are on human genome draft hg38.

Detailed methods can be found these publications:

- Bioinformatics. 2012 Mar 15; 28(6): 755–762.
- Mol Ther Methods Clin Dev. 2017 Mar 17; 4: 17–26.
- Mol Ther Methods Clin Dev. 2017 Mar 17; 4: 39–49.

Analysis software:

- INSPIRED v1.1 (<http://github.com/BushmanLab/INSPIRED>)

Report generation software:

- subjectReport v0.1 (<http://github.com/everettJK/geneTherapySubjectReport>)



# Analysis of integration site distributions and relative clonal abundance for subject p402

*November 02, 2020*

## Contents

|                                                                                                    |           |
|----------------------------------------------------------------------------------------------------|-----------|
| <b>Summary</b>                                                                                     | <b>2</b>  |
| Is there a rich population of progenitor cells delivering mature cells to the periphery? . . . . . | 2         |
| Do any cell clones account for more than 20% of all clones? . . . . .                              | 2         |
| Are any cell clones increasing in proportion over time? . . . . .                                  | 3         |
| <b>Introduction</b>                                                                                | <b>4</b>  |
| <b>Sample Summary</b>                                                                              | <b>5</b>  |
| <b>Tracking of clonal abundances</b>                                                               | <b>6</b>  |
| Relative abundance of cell clones . . . . .                                                        | 6         |
| Longitudinal behavior of major clones . . . . .                                                    | 8         |
| Integration sites near particular genes of interest . . . . .                                      | 9         |
| Sample relative abundance heatmap . . . . .                                                        | 10        |
| <b>What are the most frequently occurring gene types in the subject?</b>                           | <b>11</b> |
| <b>Multihits</b>                                                                                   | <b>12</b> |
| <b>Methods</b>                                                                                     | <b>13</b> |

# Summary

Is there a rich population of progenitor cells delivering mature cells to the periphery?

To provide a simple measure, we ask whether there are  $\geq 1000$  descendants of independent progenitors (i.e. unique integration sites) in minimally fractionated cell specimens (Whole blood, T cells, B cells, NK cells, Neutrophils, Monocytes and PBMC). Cell specimens that pass these criteria are operationally designated Rich.

| Time point | PBMC | Rich |
|------------|------|------|
| M21        | 729  | No   |
| M120       | 430  | No   |

Do any cell clones account for more than 20% of all clones?

For some trials, a reporting criteria is whether any cell clones expand to account for greater than 20% of all clones. The table below highlights samples with relative abundances  $\geq 20\%$  considering only samples with 50 or more inferred cells.

**No clones exceed 20% in any samples.**

# Are any cell clones increasing in proportion over time?

The plot below details the longitudinal sample relative abundances of the most abundant 20 clones where only samples with 50 or more inferred cells are considered.

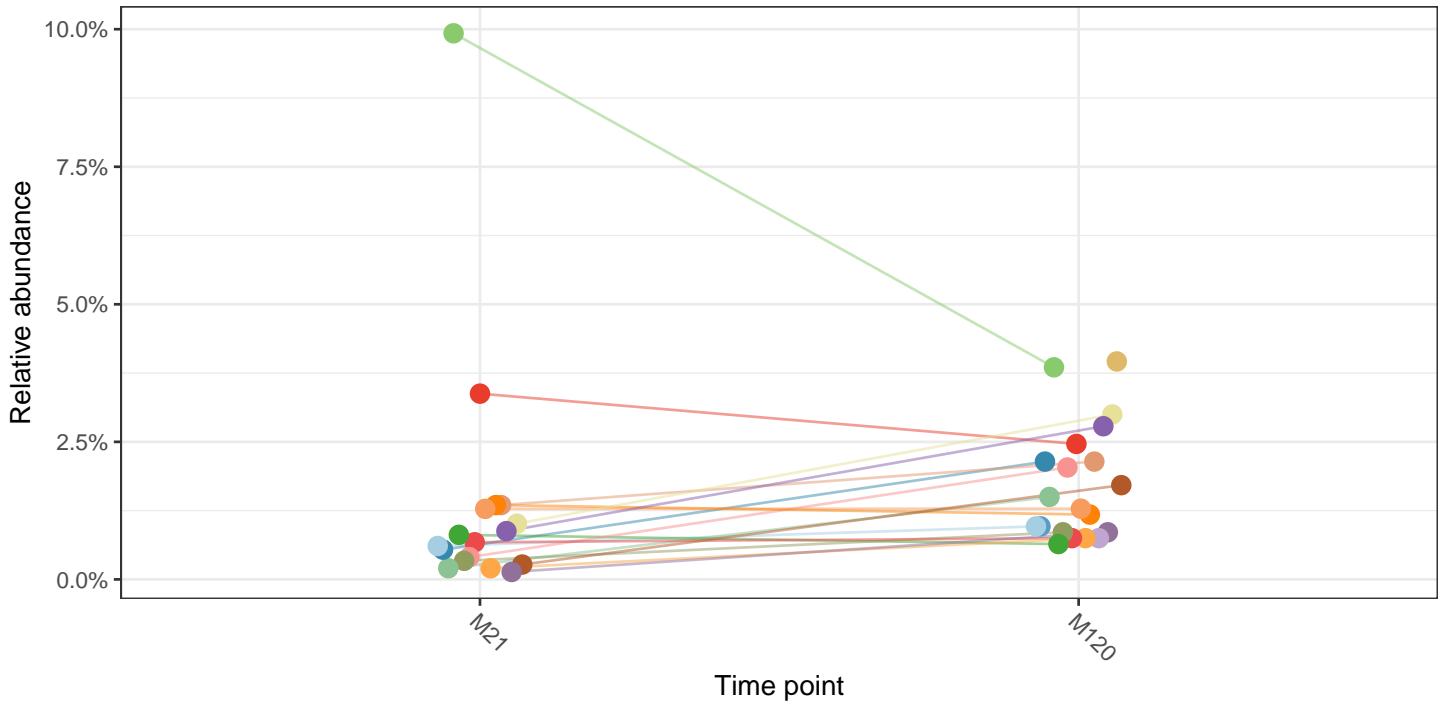

- | Clone                                                                       |                                                                                  | Data source                                   |
|-----------------------------------------------------------------------------|----------------------------------------------------------------------------------|-----------------------------------------------|
| <span style="color: lightblue;">●</span> PBMC : APOL3 *<br>chr22-36157701   | <span style="color: orange;">●</span> PBMC : MECOM *~<br>chr3-169310686          | <span style="color: black;">●</span> Illumina |
| <span style="color: blue;">●</span> PBMC : ATP2C1<br>chr3+130846823         | <span style="color: orange;">●</span> PBMC : MECOM *~<br>chr3+169351099          |                                               |
| <span style="color: darkblue;">●</span> PBMC : C20orf203<br>chr20+32677551  | <span style="color: orange;">●</span> PBMC : MECOM *~<br>chr3+169354958          |                                               |
| <span style="color: lightgreen;">●</span> PBMC : CCNJL *<br>chr5+160262326  | <span style="color: brown;">●</span> PBMC : MRVI1-AS1,MRVI1 *~<br>chr11+10588598 |                                               |
| <span style="color: green;">●</span> PBMC : DACH1 *<br>chr13-71829201       | <span style="color: purple;">●</span> PBMC : MYOF *<br>chr10+93345726            |                                               |
| <span style="color: darkgreen;">●</span> PBMC : FAR2 *<br>chr12-29242039    | <span style="color: purple;">●</span> PBMC : PECAM1 ~<br>chr17+64400161          |                                               |
| <span style="color: olive;">●</span> PBMC : FPGS *<br>chr9-127804102        | <span style="color: purple;">●</span> PBMC : PRNCR1<br>chr8-127097021            |                                               |
| <span style="color: pink;">●</span> PBMC : LOC100128288 *~<br>chr17+8360140 | <span style="color: yellowgreen;">●</span> PBMC : RAD51B ~<br>chr14+68683189     |                                               |
| <span style="color: red;">●</span> PBMC : MECOM *~<br>chr3-169151998        | <span style="color: gold;">●</span> PBMC : TSN<br>chr2+122186144                 |                                               |
| <span style="color: darkred;">●</span> PBMC : MECOM *~<br>chr3-169178454    | <span style="color: brown;">●</span> PBMC : TSPAN32 *<br>chr11-2304495           |                                               |

# Introduction

The attached report describes results of analysis of integration site distributions and relative abundance for samples from gene therapy trials. For cases of gene correction in circulating blood cells, it is possible to harvest cells sequentially from blood to monitor cell populations. Frequency of isolation information can provide information on the clonal structure of the population. This report summarizes results for subject p402 over time points M21, M120 in UCSC genome draft .

The samples studied in this report, the numbers of sequence reads, recovered integration vectors, and unique integration sites available for this subject are shown below. We quantify population clone diversity using Gini coefficients, Shannon index, and UC50. The Gini coefficient provides a measure of inequality in clonal abundance in each sample. The coefficient equals zero when all sites are equally abundant (polyclonal) and increases as fewer sites account for more of the total (oligoclonal). Shannon index is another widely used measure of diversity and it accounts for both abundance and evenness of the integration events. Alternatively, the UC50 is the number of unique clones which make up the top 50% of the sample's abundance. For polyclonal samples, one may expect a low Gini coefficient, high Shannon Index, and high UC50 (proportional to the total number of unique sites identified in the sample).

Under most circumstances only a subset of sites will be sampled. We thus include an estimate of sample size based on frequency of isolation information from the SonicLength method (Berry, 2012). The 'S.chao1' column denotes the estimated lower bound for population size derived using Chao estimate (Chao, 1987). If sample replicates were present then estimates were subjected to jackknife bias correction.

We estimate the numbers of cell clones sampled using the SonicLength method (Berry, 2012); this is summarized in the column "Inferred cells". Integration sites were recovered using ligation mediated PCR after random fragmentation of genomic DNA, which reduces recovery biases compared with restriction enzyme cleavage. Relative abundance was not measured from read counts, which are known to be inaccurate, but from marks introduced into DNA specimens prior to PCR amplification using the SonicLength method PMID:22238265.

We quantify population diversity using Gini coefficients, Shannon index, and UC50. The Gini coefficient provides a measure of inequality in clonal abundance in each sample. The coefficient equals zero when all sites are equally abundant (polyclonal) and increases as fewer sites account for more of the total (oligoclonal). Shannon index is another widely used measure of diversity and it accounts for both abundance and evenness of the integration events. UC50 is the number of clones which make up the top 50% of the sample's abundance. For polyclonal samples, one may expect a low Gini coefficient, high Shannon Index, and high UC50 (proportional to the total number of unique sites identified in the sample).

Integration positions are reported with the format (nearest gene, chromosome, +/-, genomic position) where the nearest gene is the nearest transcriptional boundary to the integration position, '+' refers to integration in the positive orientation and '-' refers to integration in the reverse orientation. Reported distances are signed where where the sign indicates if integrations are upstream (-) or downstream (+, no sign) of the nearest gene. Nearest genes possess additional annotations described in the table below.

| Symbol | Meaning                                             |
|--------|-----------------------------------------------------|
| *      | site is within a transcription unit                 |
| ~      | site is within 50kb of a cancer related gene        |
| !      | nearest gene was associated with lymphoma in humans |

# Sample Summary

The table below provides population statistics for each analyzed sample. Occasionally multiple samples from the same cell fraction and time point are analyzed where only the sample with greatest number of inferred cells is considered in this report. Sample rows with NA listed in the TotalReads, InferredCells, UniqueSite and other columns represent samples which were analyzed but no integration sites were identified.

| GTSP     | dataSource | Timepoint | CellType | TotalReads | InferredCells | UniqueSites | Gini  | Chao1 | Shannon | Pielou | UC50 | Included | runDate    | VCN   |
|----------|------------|-----------|----------|------------|---------------|-------------|-------|-------|---------|--------|------|----------|------------|-------|
| GTSP3599 | Illumina   | M21       | PBMC     | 763,881    | 1,481         | 729         | 0.444 | 1,909 | 5.89    | 0.894  | 106  | yes      | 2020-10-12 | 0.742 |
| GTSP3600 | Illumina   | M120      | PBMC     | 601,813    | 934           | 430         | 0.471 | 1,100 | 5.45    | 0.899  | 55   | yes      | 2020-10-12 | 0.476 |

# Tracking of clonal abundances

## Relative abundance of cell clones

The relative abundances of cell clones is summarized in the stacked bar plots below. The cell fraction studied is named at the top of each plot and the time points are marked at the bottom. The different bars in each panel show the major cell clones, as marked by integration sites where the x-axis indicates time points and the y-axis is scaled by proportion of the total cells sampled. The top 10 most abundant clones from each cell type have been named by the nearest gene while the remaining sites are binned as low abundance (LowAbund; grey). The total number of genomic fragments used to identify integration sites are listed atop of each plot. These fragments are generated by restriction endonucleases in 454 sequencing experiments and by sonic shearing in Illumina sequencing experiments. Relative abundances are calculated using the total number of reads associated with clones in 454 sequencing experiments while the number of unique sonic breaks is used in Illumina sequencing experiments.

PBMC

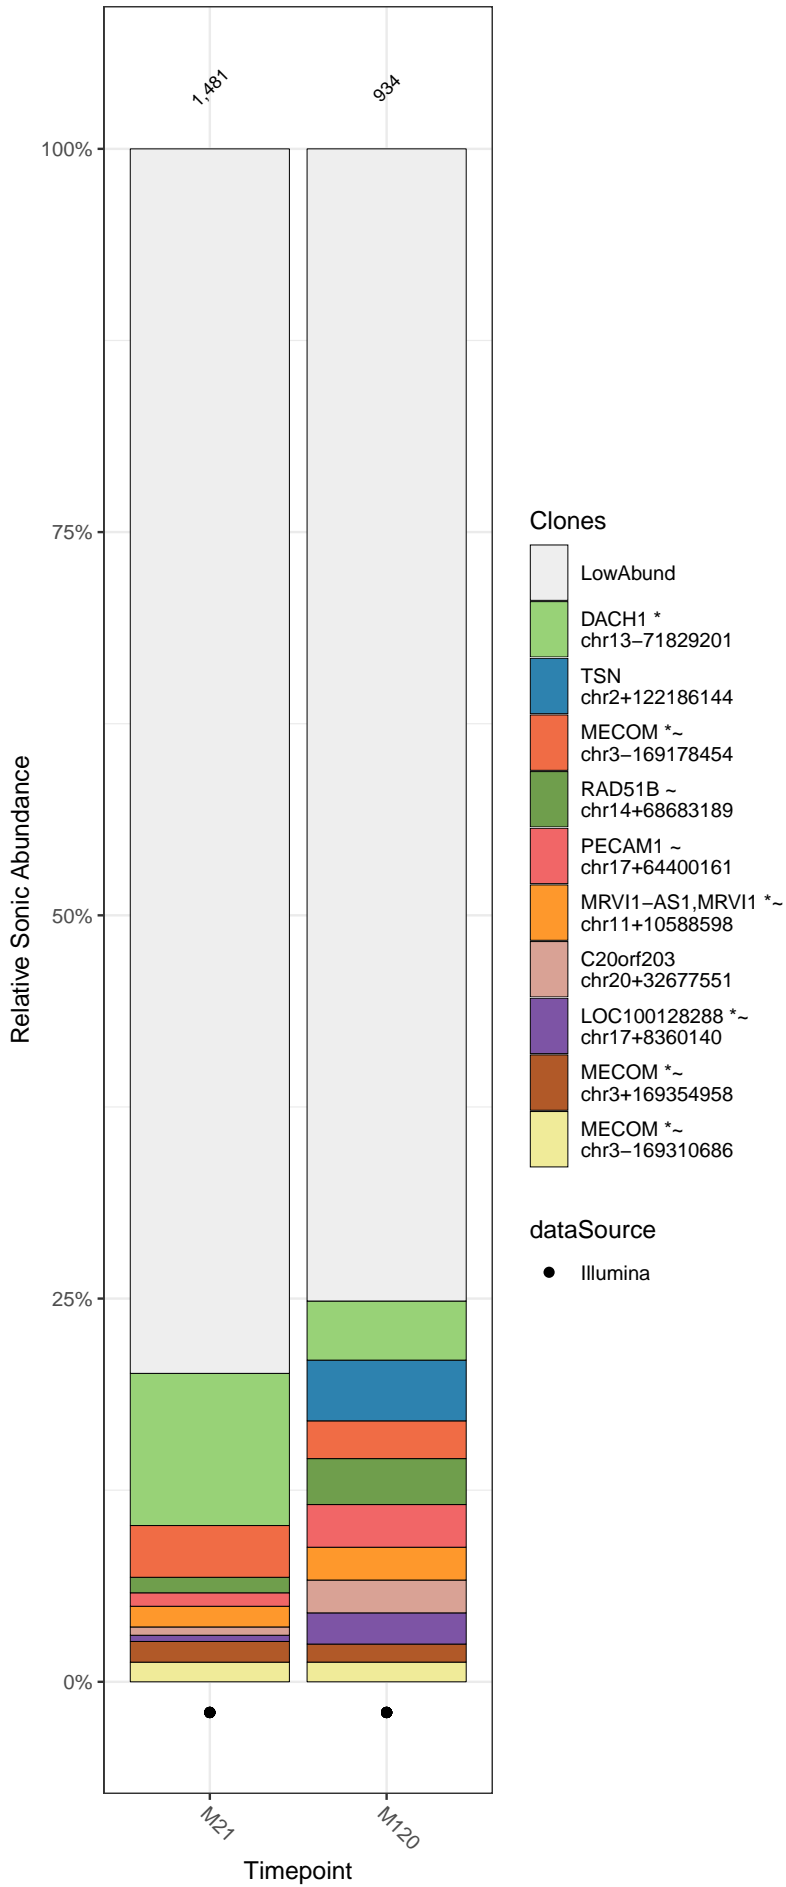

## Longitudinal behavior of major clones

When multiple time points are available, it is of interest to track the behavior of the most abundant clones across different cell types. A plot of the relative abundances of the most abundant 10 clones is shown below. For cases where only a single time point is available, the data is plotted as unlinked points.

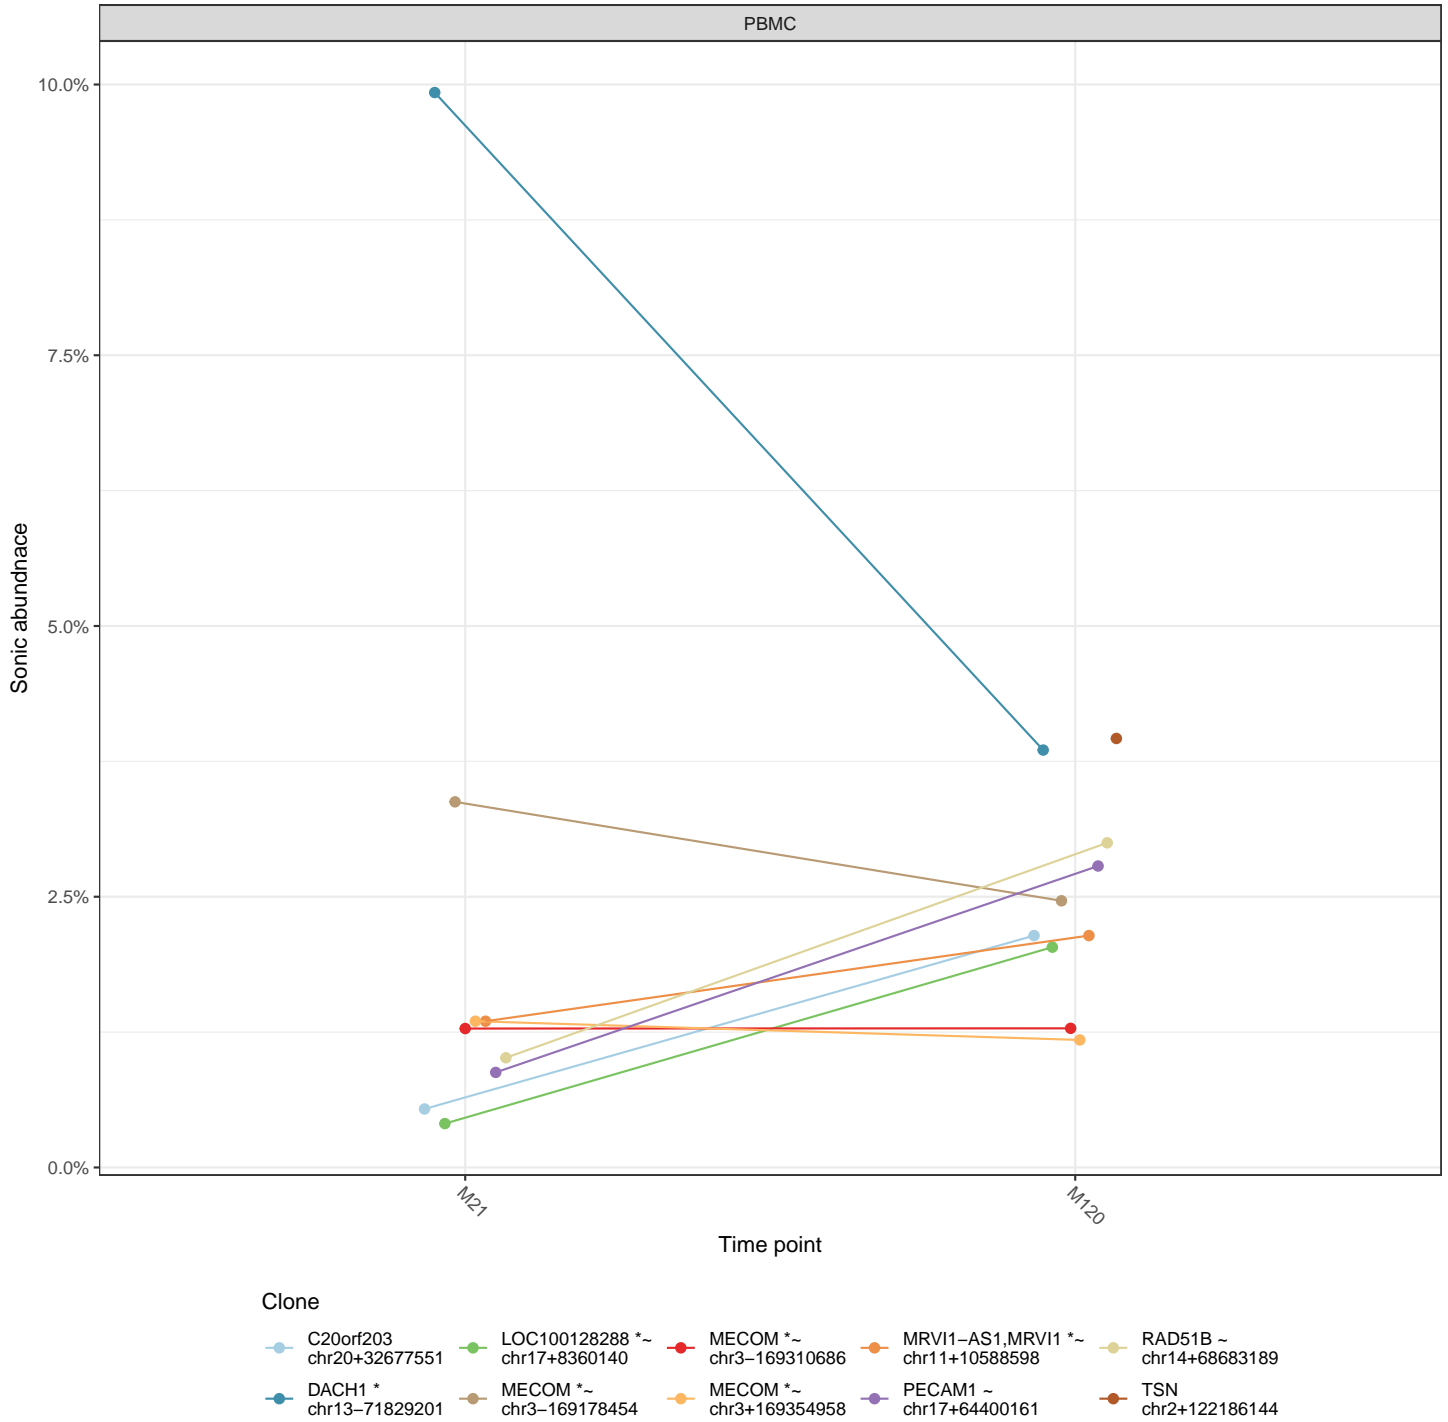



# Integration sites near particular genes of interest

Integration sites near genes that have been associated with adverse events are of particular interest. Below are longitudinal relative abundance plots that focus on the most abundant 5 clones whose nearest genes are LMO2, IKZF1, CCND2, HMGA2, and MECOM.

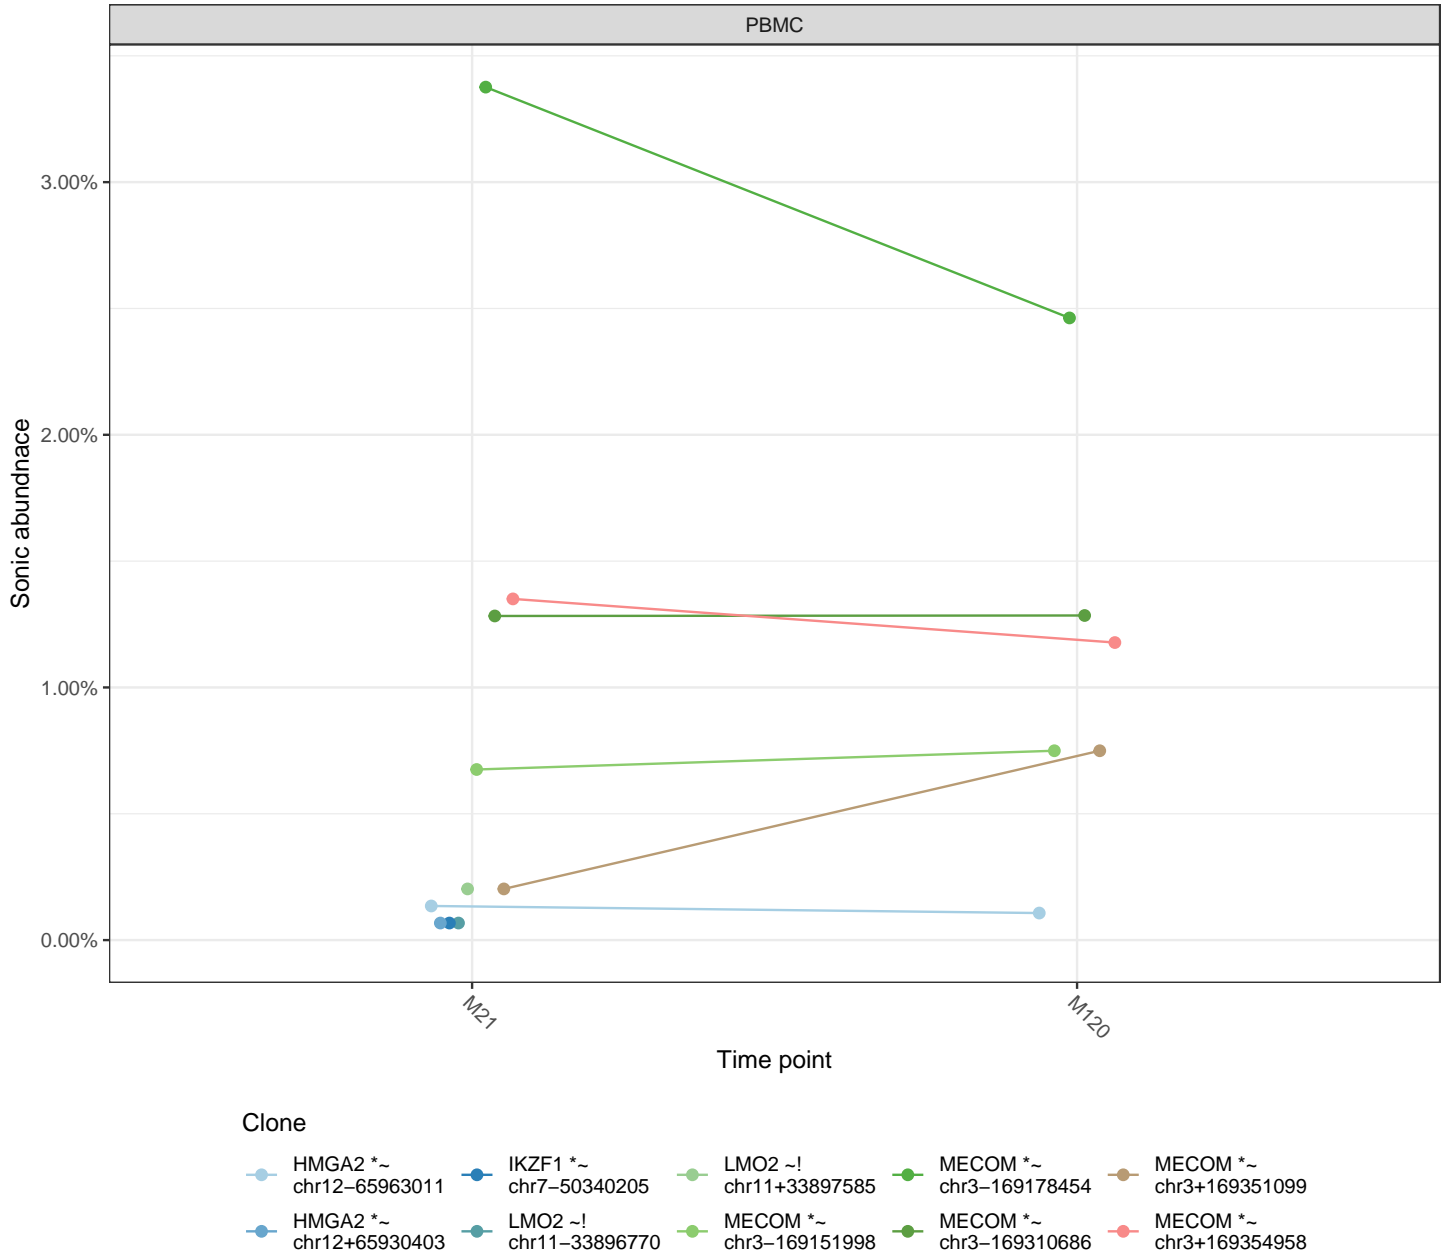

# Sample relative abundance heatmap

Alternatively, the relative abundances of the most abundant 10 clones from each cell sampled type can be visualized as a heat map.

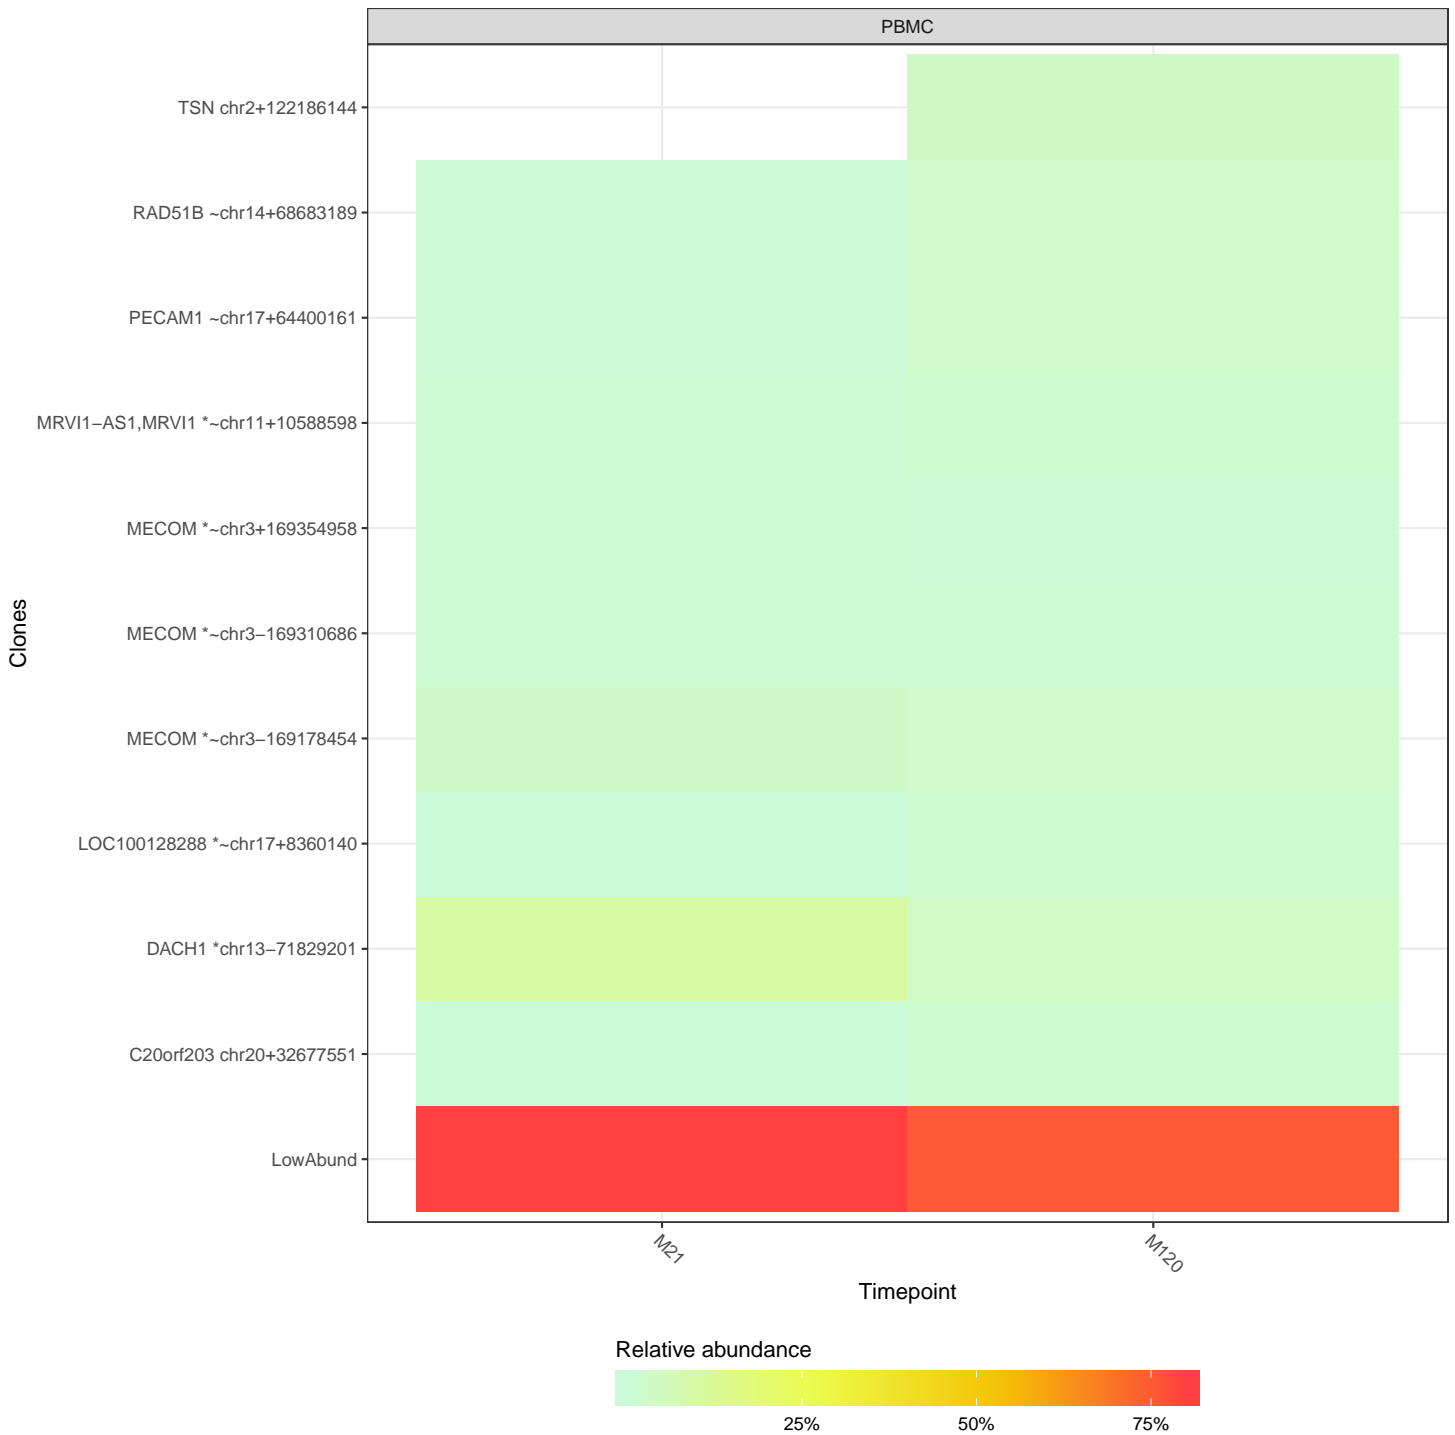

# What are the most frequently occurring gene types in the subject?

The word clouds below illustrate the nearest genes of the most abundant clones from each sample where the numeric ranges represent the upper and lower clonal abundances.

PBMC  
M21 3:147

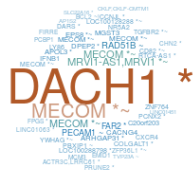

PBMC  
M120 2:37

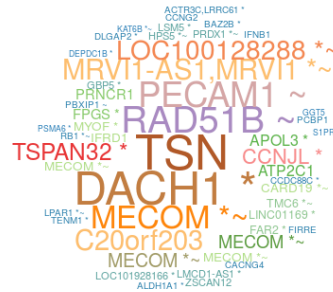

# Multihits

This analysis has been looking at integration sites that can be uniquely mapped. But it is also helpful to look at reads finding multiple equally good alignments in the genome which can be referred to as 'Multihits'. If an integration site occurred within a repeat element (i.e. Alus, LINE, SINE, etc), then it might be helpful to access those sites for potential detrimental effects. These collection of sequences are analyzed separately due to their ambiguity.

No sample contained a multihit grouping which exceeded 20% of the sample's inferred cells.

# Methods

All coordinates are on human genome draft hg38.

Detailed methods can be found these publications:

- Bioinformatics. 2012 Mar 15; 28(6): 755–762.
- Mol Ther Methods Clin Dev. 2017 Mar 17; 4: 17–26.
- Mol Ther Methods Clin Dev. 2017 Mar 17; 4: 39–49.

Analysis software:

- INSPIRED v1.1 (<http://github.com/BushmanLab/INSPIRED>)

Report generation software:

- subjectReport v0.1 (<http://github.com/everettJK/geneTherapySubjectReport>)

# Analysis of integration site distributions and relative clonal abundance for subject p403

*November 02, 2020*

## Contents

|                                                                                                    |           |
|----------------------------------------------------------------------------------------------------|-----------|
| <b>Summary</b>                                                                                     | <b>2</b>  |
| Is there a rich population of progenitor cells delivering mature cells to the periphery? . . . . . | 2         |
| Do any cell clones account for more than 20% of all clones? . . . . .                              | 2         |
| Are any cell clones increasing in proportion over time? . . . . .                                  | 3         |
| <b>Introduction</b>                                                                                | <b>4</b>  |
| <b>Sample Summary</b>                                                                              | <b>5</b>  |
| <b>Tracking of clonal abundances</b>                                                               | <b>6</b>  |
| Relative abundance of cell clones . . . . .                                                        | 6         |
| Longitudinal behavior of major clones . . . . .                                                    | 8         |
| Integration sites near particular genes of interest . . . . .                                      | 9         |
| Sample relative abundance heatmap . . . . .                                                        | 10        |
| <b>What are the most frequently occurring gene types in the subject?</b>                           | <b>11</b> |
| <b>Multihits</b>                                                                                   | <b>12</b> |
| <b>Methods</b>                                                                                     | <b>13</b> |

# Summary

Is there a rich population of progenitor cells delivering mature cells to the periphery?

To provide a simple measure, we ask whether there are  $\geq 1000$  descendants of independent progenitors (i.e. unique integration sites) in minimally fractionated cell specimens (Whole blood, T cells, B cells, NK cells, Neutrophils, Monocytes and PBMC). Cell specimens that pass these criteria are operationally designated Rich.

| Time point | PBMC | Rich |
|------------|------|------|
| M30        | 38   | No   |
| M118       | 63   | No   |

Do any cell clones account for more than 20% of all clones?

For some trials, a reporting criteria is whether any cell clones expand to account for greater than 20% of all clones. The table below highlights samples with relative abundances  $\geq 20\%$  considering only samples with 50 or more inferred cells.

**No clones exceed 20% in any samples.**

# Are any cell clones increasing in proportion over time?

The plot below details the longitudinal sample relative abundances of the most abundant 20 clones where only samples with 50 or more inferred cells are considered.

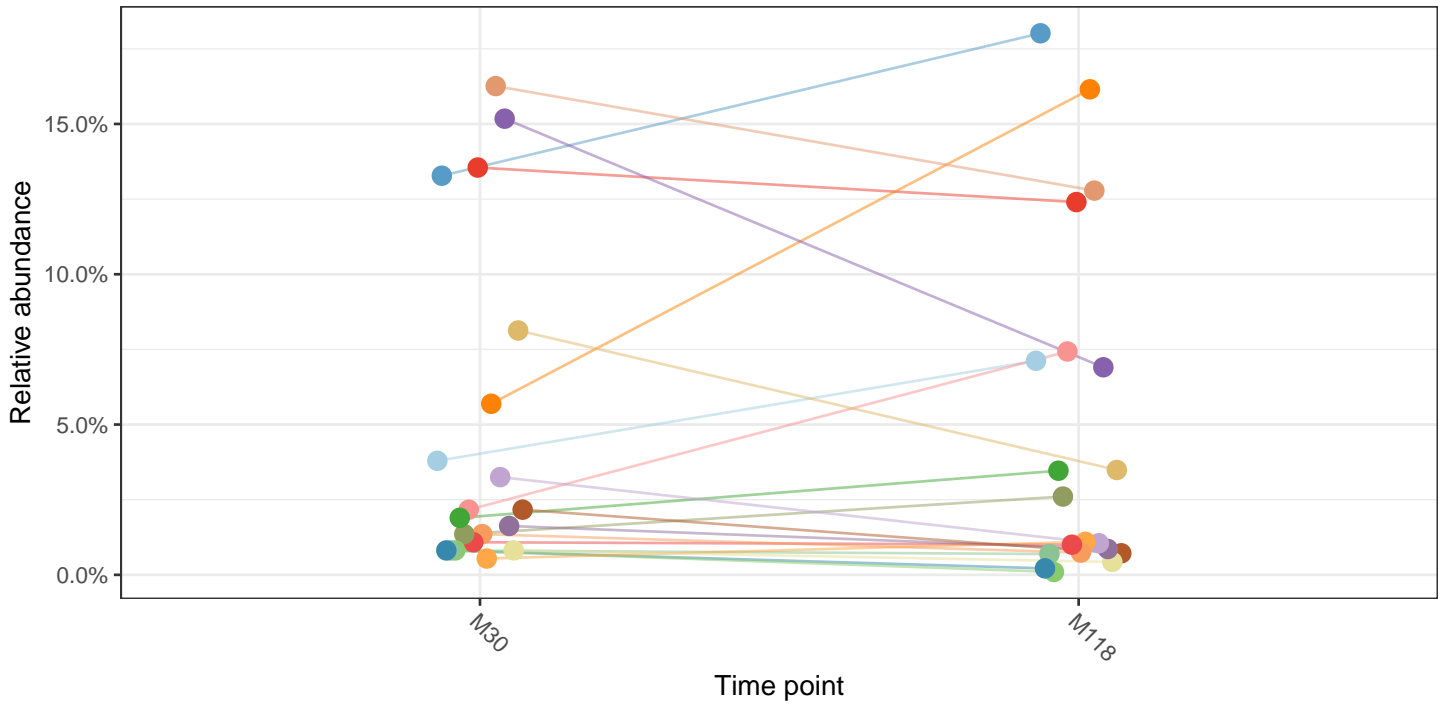

- | Clone                                                                           |                                                                               | Data source                                   |
|---------------------------------------------------------------------------------|-------------------------------------------------------------------------------|-----------------------------------------------|
| <span style="color: lightblue;">●</span> PBMC : BAALC *~<br>chr8-103141436      | <span style="color: orange;">●</span> PBMC : LINC01214 *<br>chr3-150300831    | <span style="color: black;">●</span> Illumina |
| <span style="color: blue;">●</span> PBMC : BCAS4 *~<br>chr20+50804897           | <span style="color: orange;">●</span> PBMC : LOC107985820<br>chr2-123696368   |                                               |
| <span style="color: darkblue;">●</span> PBMC : BCR *~!<br>chr22-23218173        | <span style="color: orange;">●</span> PBMC : MECOM *~<br>chr3-169339867       |                                               |
| <span style="color: lightgreen;">●</span> PBMC : DLGAP4-AS1 *<br>chr20+36573078 | <span style="color: orange;">●</span> PBMC : NFE2<br>chr12+54304228           |                                               |
| <span style="color: green;">●</span> PBMC : FADS2 *~<br>chr11+61828744          | <span style="color: purple;">●</span> PBMC : PRKCB *<br>chr16-23902855        |                                               |
| <span style="color: darkgreen;">●</span> PBMC : FKBP5 *<br>chr6+35719035        | <span style="color: purple;">●</span> PBMC : RAD51B *~<br>chr14-68142486      |                                               |
| <span style="color: olive;">●</span> PBMC : FOXP1 *~<br>chr3-71581082           | <span style="color: purple;">●</span> PBMC : RUBCNL<br>chr13+46402386         |                                               |
| <span style="color: pink;">●</span> PBMC : JARID2 *<br>chr6+15411344            | <span style="color: yellowgreen;">●</span> PBMC : SETBP1 *~<br>chr18+44830579 |                                               |
| <span style="color: red;">●</span> PBMC : KIAA0513 *~<br>chr16-85047822         | <span style="color: gold;">●</span> PBMC : ST3GAL5 *<br>chr2-85888569         |                                               |
| <span style="color: darkred;">●</span> PBMC : KRCC1 *<br>chr2+88053735          | <span style="color: brown;">●</span> PBMC : THEM4 ~<br>chr1+151945703         |                                               |



# Introduction

The attached report describes results of analysis of integration site distributions and relative abundance for samples from gene therapy trials. For cases of gene correction in circulating blood cells, it is possible to harvest cells sequentially from blood to monitor cell populations. Frequency of isolation information can provide information on the clonal structure of the population. This report summarizes results for subject p403 over time points M30, M118 in UCSC genome draft .

The samples studied in this report, the numbers of sequence reads, recovered integration vectors, and unique integration sites available for this subject are shown below. We quantify population clone diversity using Gini coefficients, Shannon index, and UC50. The Gini coefficient provides a measure of inequality in clonal abundance in each sample. The coefficient equals zero when all sites are equally abundant (polyclonal) and increases as fewer sites account for more of the total (oligoclonal). Shannon index is another widely used measure of diversity and it accounts for both abundance and evenness of the integration events. Alternatively, the UC50 is the number of unique clones which make up the top 50% of the sample's abundance. For polyclonal samples, one may expect a low Gini coefficient, high Shannon Index, and high UC50 (proportional to the total number of unique sites identified in the sample).

Under most circumstances only a subset of sites will be sampled. We thus include an estimate of sample size based on frequency of isolation information from the SonicLength method (Berry, 2012). The 'S.chao1' column denotes the estimated lower bound for population size derived using Chao estimate (Chao, 1987). If sample replicates were present then estimates were subjected to jackknife bias correction.

We estimate the numbers of cell clones sampled using the SonicLength method (Berry, 2012); this is summarized in the column "Inferred cells". Integration sites were recovered using ligation mediated PCR after random fragmentation of genomic DNA, which reduces recovery biases compared with restriction enzyme cleavage. Relative abundance was not measured from read counts, which are known to be inaccurate, but from marks introduced into DNA specimens prior to PCR amplification using the SonicLength method PMID:22238265.

We quantify population diversity using Gini coefficients, Shannon index, and UC50. The Gini coefficient provides a measure of inequality in clonal abundance in each sample. The coefficient equals zero when all sites are equally abundant (polyclonal) and increases as fewer sites account for more of the total (oligoclonal). Shannon index is another widely used measure of diversity and it accounts for both abundance and evenness of the integration events. UC50 is the number of clones which make up the top 50% of the sample's abundance. For polyclonal samples, one may expect a low Gini coefficient, high Shannon Index, and high UC50 (proportional to the total number of unique sites identified in the sample).

Integration positions are reported with the format (nearest gene, chromosome, +/-, genomic position) where the nearest gene is the nearest transcriptional boundary to the integration position, '+' refers to integration in the positive orientation and '-' refers to integration in the reverse orientation. Reported distances are signed where where the sign indicates if integrations are upstream (-) or downstream (+, no sign) of the nearest gene. Nearest genes possess additional annotations described in the table below.

| Symbol | Meaning                                             |
|--------|-----------------------------------------------------|
| *      | site is within a transcription unit                 |
| ~      | site is within 50kb of a cancer related gene        |
| !      | nearest gene was associated with lymphoma in humans |

# Sample Summary

The table below provides population statistics for each analyzed sample. Occasionally multiple samples from the same cell fraction and time point are analyzed where only the sample with greatest number of inferred cells is considered in this report. Sample rows with NA listed in the TotalReads, InferredCells, UniqueSite and other columns represent samples which were analyzed but no integration sites were identified.

| GTSP     | dataSource | Timepoint | CellType | TotalReads | InferredCells | UniqueSites | Gini  | Chao1 | Shannon | Pielou | UC50 | Included | runDate    | VCN   |
|----------|------------|-----------|----------|------------|---------------|-------------|-------|-------|---------|--------|------|----------|------------|-------|
| GTSP3601 | Illumina   | M30       | PBMC     | 1,251,244  | 369           | 38          | 0.697 | 68    | 2.69    | 0.741  | 4    | yes      | 2020-10-28 | 0.195 |
| GTSP3602 | Illumina   | M118      | PBMC     | 991,798    | 4,185         | 63          | 0.847 | 131   | 2.54    | 0.613  | 4    | yes      | 2020-10-28 | 0.545 |

# Tracking of clonal abundances

## Relative abundance of cell clones

The relative abundances of cell clones is summarized in the stacked bar plots below. The cell fraction studied is named at the top of each plot and the time points are marked at the bottom. The different bars in each panel show the major cell clones, as marked by integration sites where the x-axis indicates time points and the y-axis is scaled by proportion of the total cells sampled. The top 10 most abundant clones from each cell type have been named by the nearest gene while the remaining sites are binned as low abundance (LowAbund; grey). The total number of genomic fragments used to identify integration sites are listed atop of each plot. These fragments are generated by restriction endonucleases in 454 sequencing experiments and by sonic shearing in Illumina sequencing experiments. Relative abundances are calculated using the total number of reads associated with clones in 454 sequencing experiments while the number of unique sonic breaks is used in Illumina sequencing experiments.

PBMC

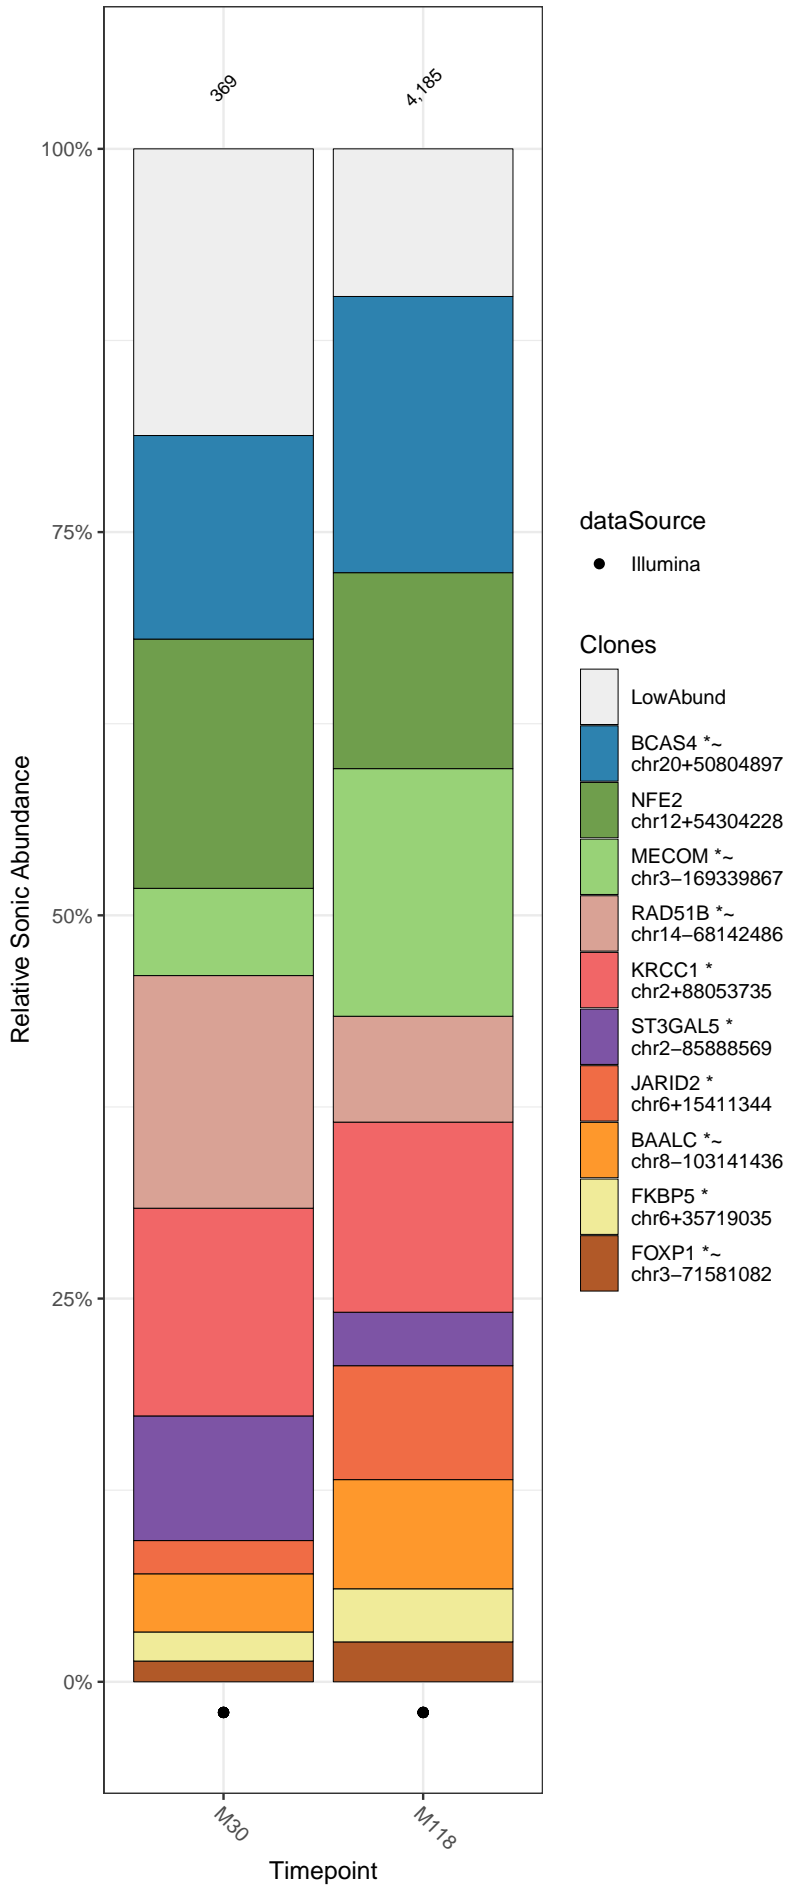

# Longitudinal behavior of major clones

When multiple time points are available, it is of interest to track the behavior of the most abundant clones across different cell types. A plot of the relative abundances of the most abundant 10 clones is shown below. For cases where only a single time point is available, the data is plotted as unlinked points.

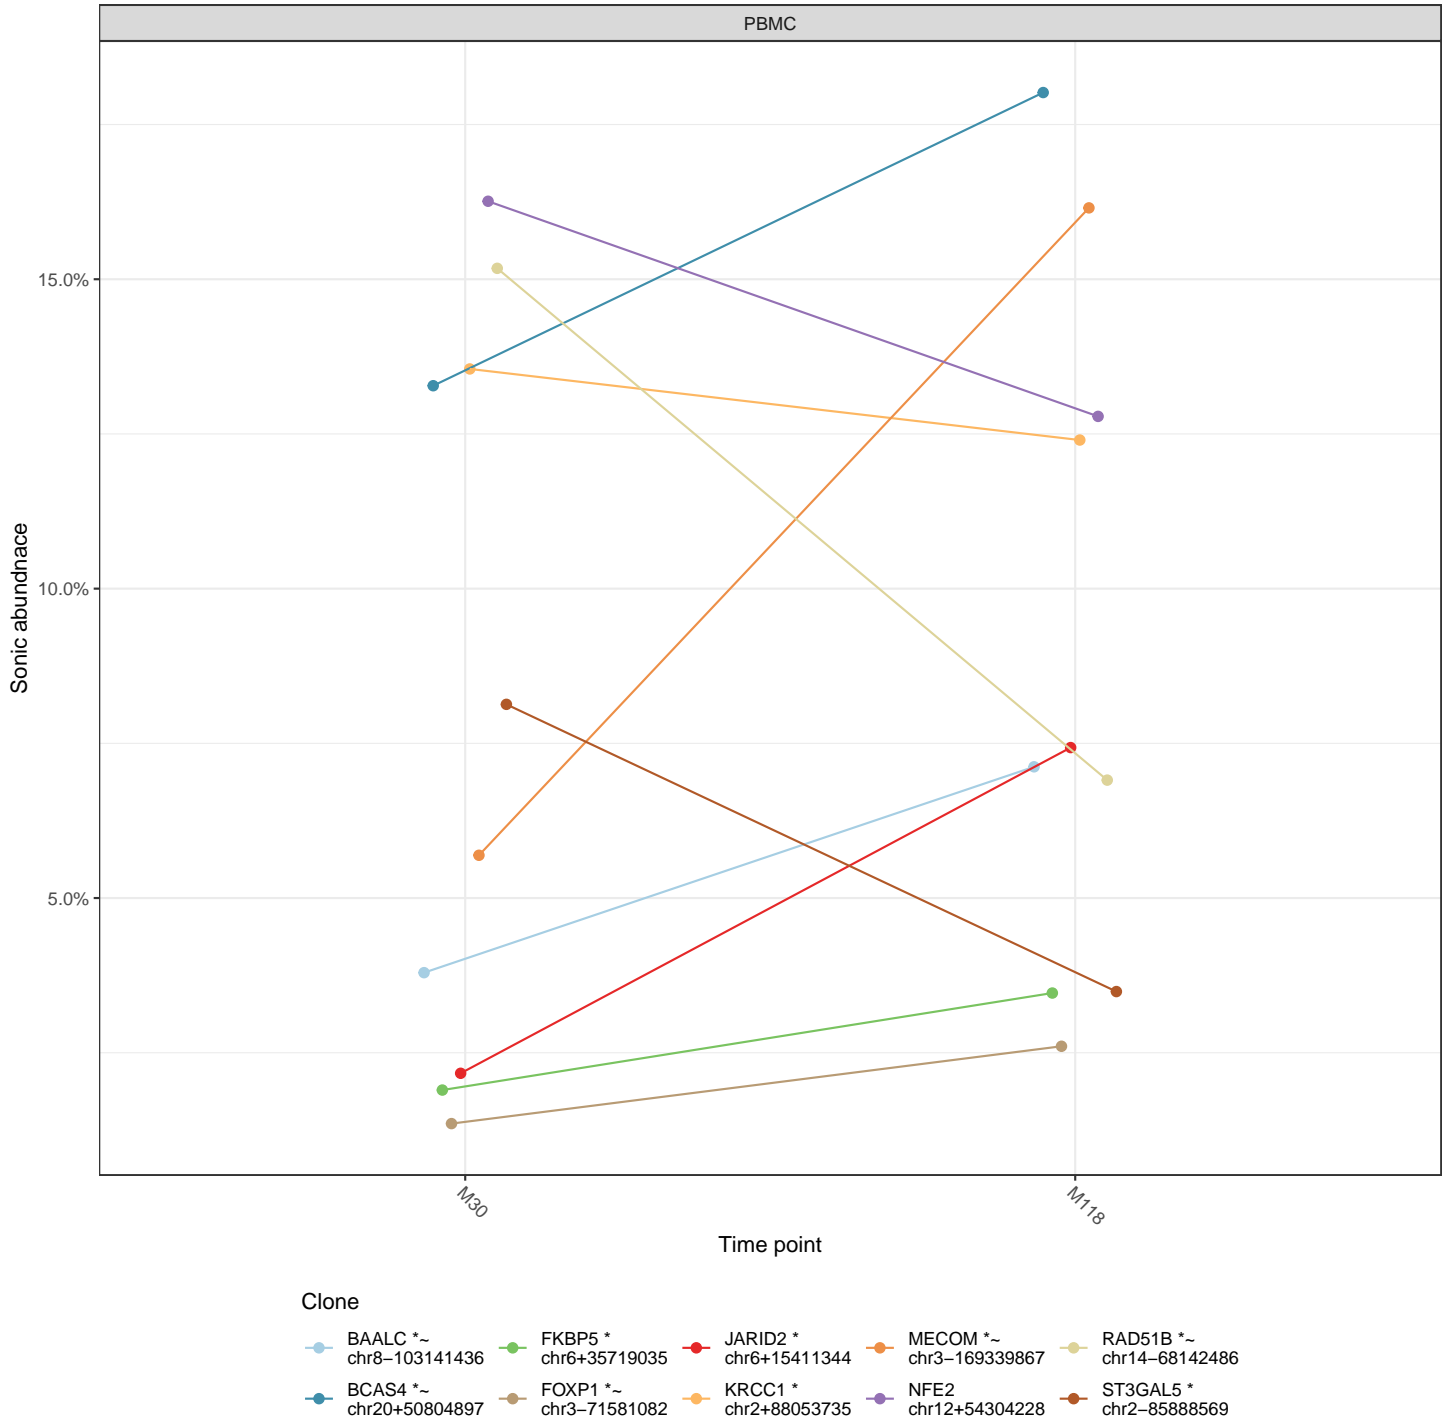

## Integration sites near particular genes of interest

Integration sites near genes that have been associated with adverse events are of particular interest. Below are longitudinal relative abundance plots that focus on the most abundant 5 clones whose nearest genes are LMO2, IKZF1, CCND2, HMGA2, and MECOM.

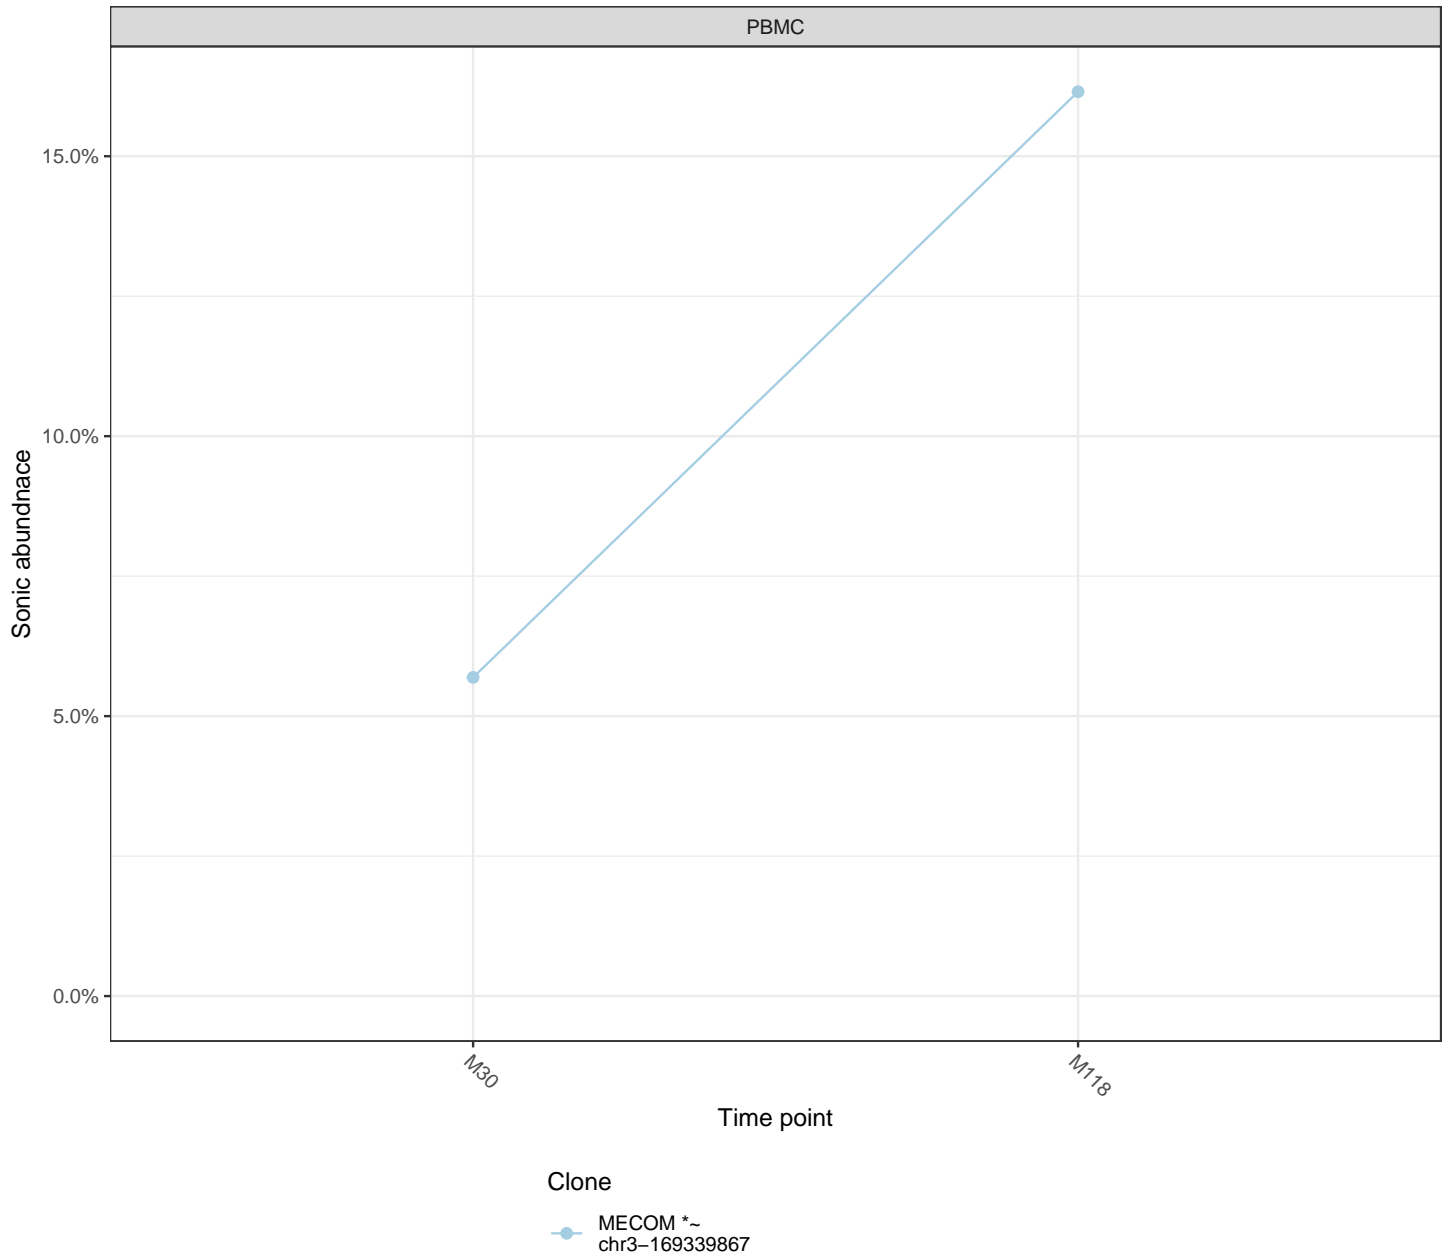

# Sample relative abundance heatmap

Alternatively, the relative abundances of the most abundant 10 clones from each cell sampled type can be visualized as a heat map.

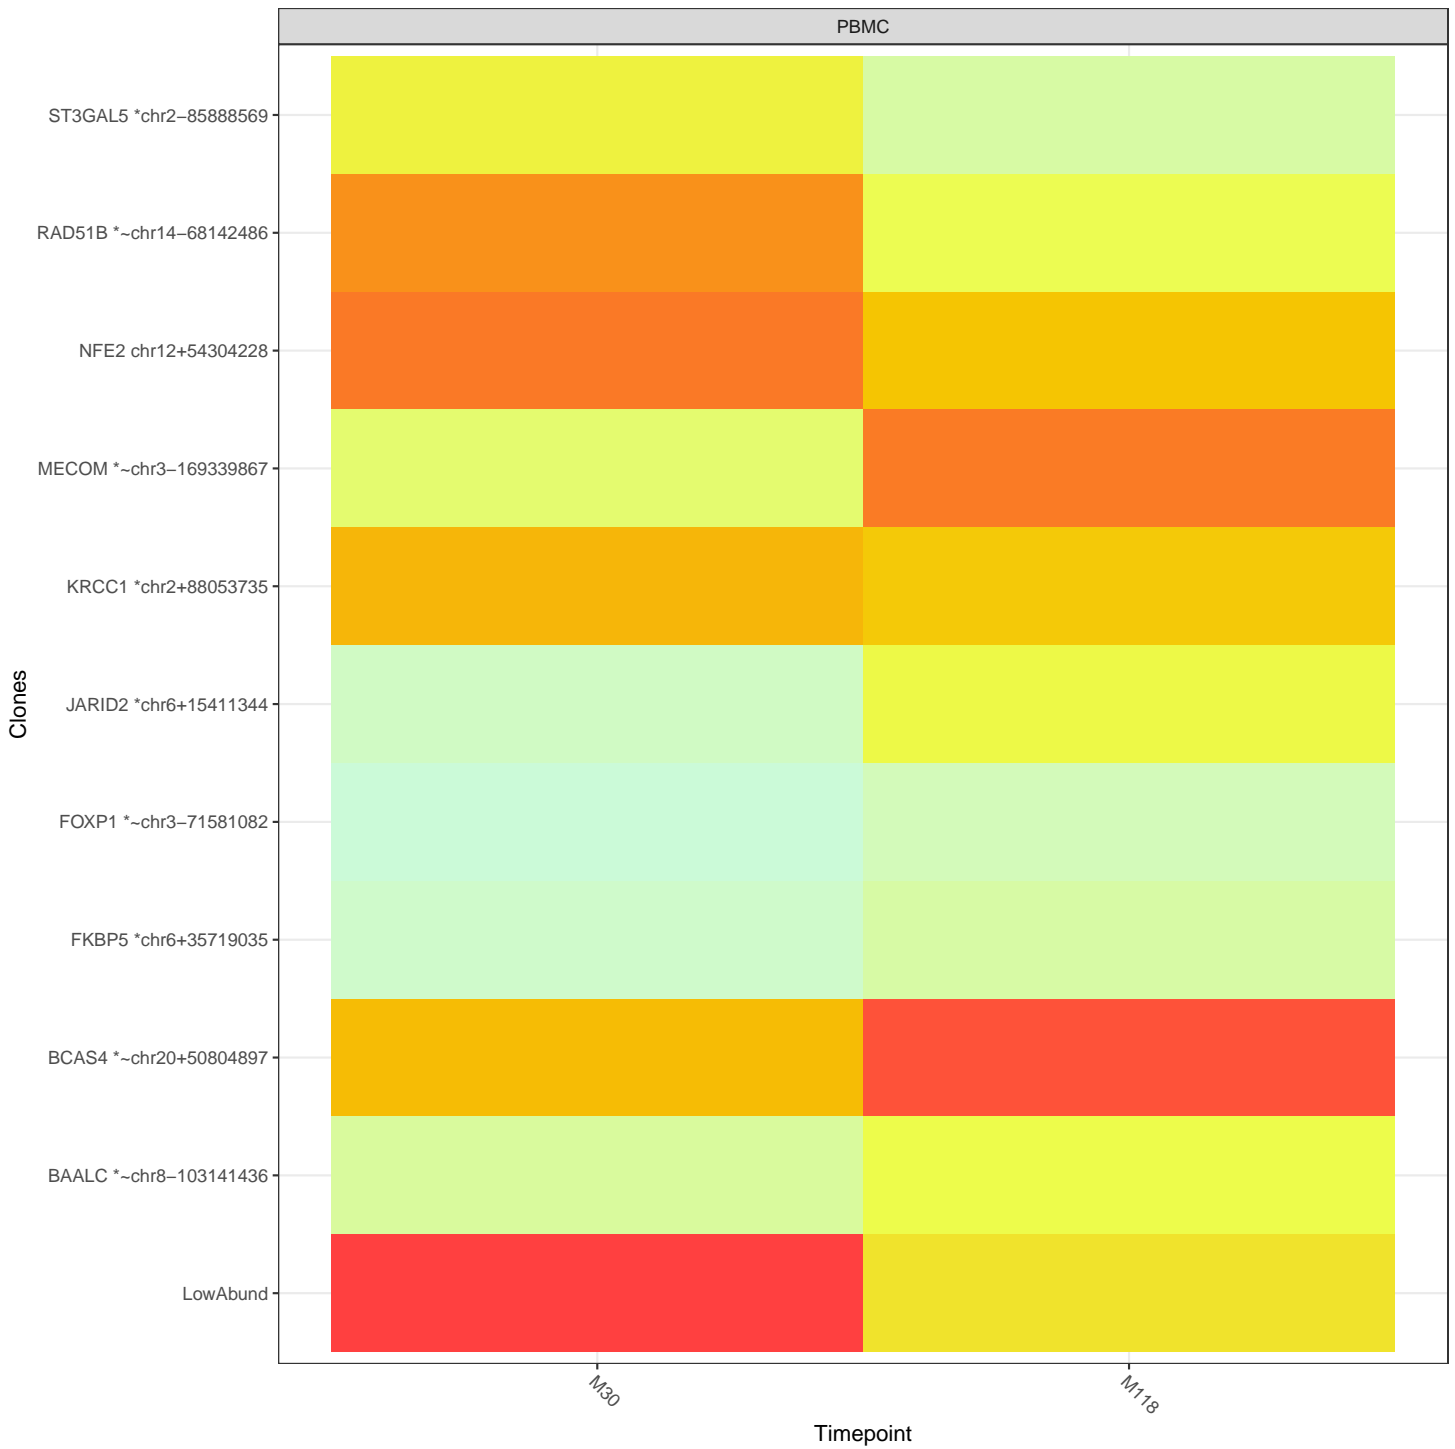

# What are the most frequently occurring gene types in the subject?

The word clouds below illustrate the nearest genes of the most abundant clones from each sample where the numeric ranges represent the upper and lower clonal abundances.

PBMC  
M30 1:60

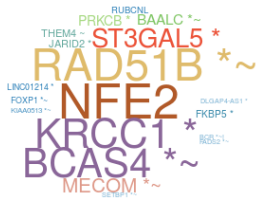

PBMC  
M118 1:754

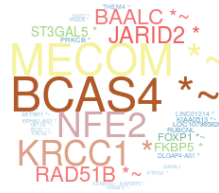



# Multihits

This analysis has been looking at integration sites that can be uniquely mapped. But it is also helpful to look at reads finding multiple equally good alignments in the genome which can be referred to as 'Multihits'. If an integration site occurred within a repeat element (i.e. Alus, LINE, SINE, etc), then it might be helpful to access those sites for potential detrimental effects. These collection of sequences are analyzed separately due to their ambiguity.

No sample contained a multihit grouping which exceeded 20% of the sample's inferred cells.

# Methods

All coordinates are on human genome draft hg38.

Detailed methods can be found these publications:

- Bioinformatics. 2012 Mar 15; 28(6): 755–762.
- Mol Ther Methods Clin Dev. 2017 Mar 17; 4: 17–26.
- Mol Ther Methods Clin Dev. 2017 Mar 17; 4: 39–49.

Analysis software:

- INSPIRED v1.1 (<http://github.com/BushmanLab/INSPIRED>)

Report generation software:

- subjectReport v0.1 (<http://github.com/everettJK/geneTherapySubjectReport>)

# Analysis of integration site distributions and relative clonal abundance for subject p404

*November 02, 2020*

## Contents

|                                                                                                    |           |
|----------------------------------------------------------------------------------------------------|-----------|
| <b>Summary</b>                                                                                     | <b>2</b>  |
| Is there a rich population of progenitor cells delivering mature cells to the periphery? . . . . . | 2         |
| Do any cell clones account for more than 20% of all clones? . . . . .                              | 2         |
| Are any cell clones increasing in proportion over time? . . . . .                                  | 3         |
| <b>Introduction</b>                                                                                | <b>4</b>  |
| <b>Sample Summary</b>                                                                              | <b>5</b>  |
| <b>Tracking of clonal abundances</b>                                                               | <b>6</b>  |
| Relative abundance of cell clones . . . . .                                                        | 6         |
| Longitudinal behavior of major clones . . . . .                                                    | 8         |
| Integration sites near particular genes of interest . . . . .                                      | 9         |
| Sample relative abundance heatmap . . . . .                                                        | 10        |
| <b>What are the most frequently occurring gene types in the subject?</b>                           | <b>11</b> |
| <b>Multihits</b>                                                                                   | <b>12</b> |
| <b>Methods</b>                                                                                     | <b>13</b> |

# Summary

Is there a rich population of progenitor cells delivering mature cells to the periphery?

To provide a simple measure, we ask whether there are  $\geq 1000$  descendants of independent progenitors (i.e. unique integration sites) in minimally fractionated cell specimens (Whole blood, T cells, B cells, NK cells, Neutrophils, Monocytes and PBMC). Cell specimens that pass these criteria are operationally designated Rich.

| Time point | PBMC  | Rich |
|------------|-------|------|
| M24        | 1,725 | Yes  |
| M54        | 353   | No   |

Do any cell clones account for more than 20% of all clones?

For some trials, a reporting criteria is whether any cell clones expand to account for greater than 20% of all clones. The table below highlights samples with relative abundances  $\geq 20\%$  considering only samples with 50 or more inferred cells.

**No clones exceed 20% in any samples.**

# Are any cell clones increasing in proportion over time?

The plot below details the longitudinal sample relative abundances of the most abundant 20 clones where only samples with 50 or more inferred cells are considered.

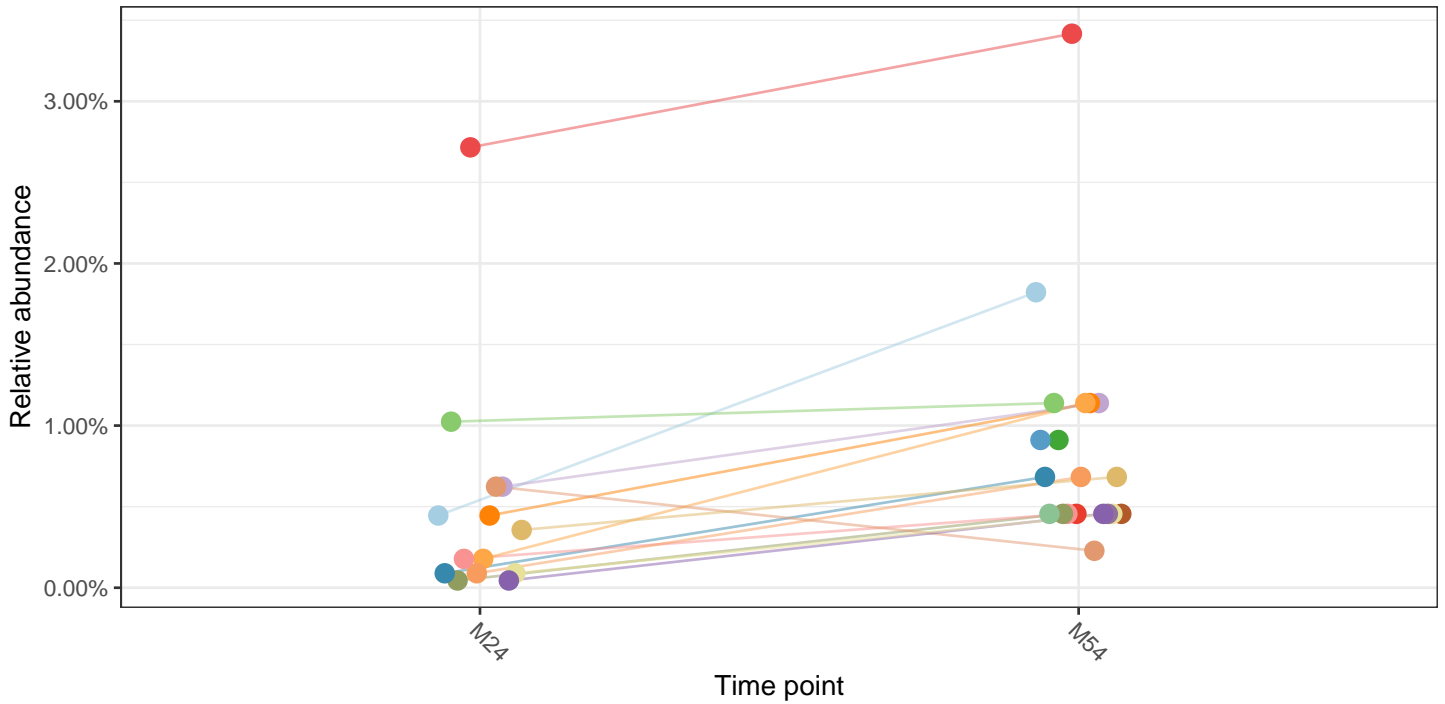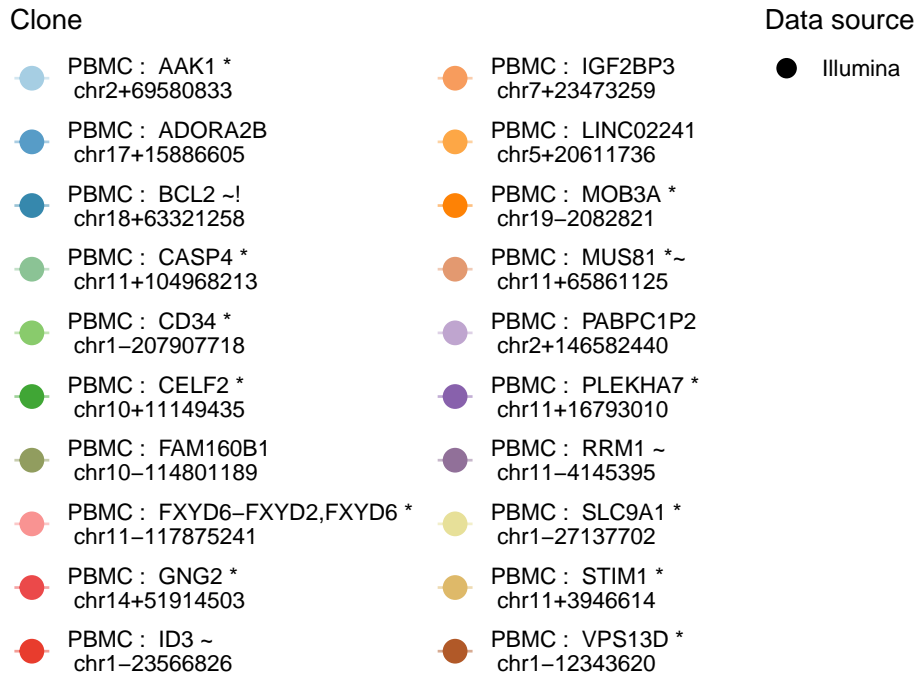

# Introduction

The attached report describes results of analysis of integration site distributions and relative abundance for samples from gene therapy trials. For cases of gene correction in circulating blood cells, it is possible to harvest cells sequentially from blood to monitor cell populations. Frequency of isolation information can provide information on the clonal structure of the population. This report summarizes results for subject p404 over time points M24, M54 in UCSC genome draft .

The samples studied in this report, the numbers of sequence reads, recovered integration vectors, and unique integration sites available for this subject are shown below. We quantify population clone diversity using Gini coefficients, Shannon index, and UC50. The Gini coefficient provides a measure of inequality in clonal abundance in each sample. The coefficient equals zero when all sites are equally abundant (polyclonal) and increases as fewer sites account for more of the total (oligoclonal). Shannon index is another widely used measure of diversity and it accounts for both abundance and evenness of the integration events. Alternatively, the UC50 is the number of unique clones which make up the top 50% of the sample's abundance. For polyclonal samples, one may expect a low Gini coefficient, high Shannon Index, and high UC50 (proportional to the total number of unique sites identified in the sample).

Under most circumstances only a subset of sites will be sampled. We thus include an estimate of sample size based on frequency of isolation information from the SonicLength method (Berry, 2012). The 'S.chao1' column denotes the estimated lower bound for population size derived using Chao estimate (Chao, 1987). If sample replicates were present then estimates were subjected to jackknife bias correction.

We estimate the numbers of cell clones sampled using the SonicLength method (Berry, 2012); this is summarized in the column "Inferred cells". Integration sites were recovered using ligation mediated PCR after random fragmentation of genomic DNA, which reduces recovery biases compared with restriction enzyme cleavage. Relative abundance was not measured from read counts, which are known to be inaccurate, but from marks introduced into DNA specimens prior to PCR amplification using the SonicLength method PMID:22238265.

We quantify population diversity using Gini coefficients, Shannon index, and UC50. The Gini coefficient provides a measure of inequality in clonal abundance in each sample. The coefficient equals zero when all sites are equally abundant (polyclonal) and increases as fewer sites account for more of the total (oligoclonal). Shannon index is another widely used measure of diversity and it accounts for both abundance and evenness of the integration events. UC50 is the number of clones which make up the top 50% of the sample's abundance. For polyclonal samples, one may expect a low Gini coefficient, high Shannon Index, and high UC50 (proportional to the total number of unique sites identified in the sample).

Integration positions are reported with the format (nearest gene, chromosome, +/-, genomic position) where the nearest gene is the nearest transcriptional boundary to the integration position, '+' refers to integration in the positive orientation and '-' refers to integration in the reverse orientation. Reported distances are signed where where the sign indicates if integrations are upstream (-) or downstream (+, no sign) of the nearest gene. Nearest genes possess additional annotations described in the table below.

| Symbol | Meaning                                             |
|--------|-----------------------------------------------------|
| *      | site is within a transcription unit                 |
| ~      | site is within 50kb of a cancer related gene        |
| !      | nearest gene was associated with lymphoma in humans |

# Sample Summary

The table below provides population statistics for each analyzed sample. Occasionally multiple samples from the same cell fraction and time point are analyzed where only the sample with greatest number of inferred cells is considered in this report. Sample rows with NA listed in the TotalReads, InferredCells, UniqueSite and other columns represent samples which were analyzed but no integration sites were identified.

| GTSP     | dataSource | Timepoint | CellType | TotalReads | InferredCells | UniqueSites | Gini  | Chao1 | Shannon | Pielou | UC50 | Included | runDate    | VCN   |
|----------|------------|-----------|----------|------------|---------------|-------------|-------|-------|---------|--------|------|----------|------------|-------|
| GTSP3603 | Illumina   | M24       | PBMC     | 317,269    | 2,246         | 1,725       | 0.214 | 8,750 | 7.22    | 0.969  | 603  | yes      | 2020-10-28 | 0.686 |
| GTSP3604 | Illumina   | M54       | PBMC     | 263,974    | 439           | 353         | 0.179 | 1,573 | 5.72    | 0.974  | 134  | yes      | 2020-10-28 | 0.540 |

# Tracking of clonal abundances

## Relative abundance of cell clones

The relative abundances of cell clones is summarized in the stacked bar plots below. The cell fraction studied is named at the top of each plot and the time points are marked at the bottom. The different bars in each panel show the major cell clones, as marked by integration sites where the x-axis indicates time points and the y-axis is scaled by proportion of the total cells sampled. The top 10 most abundant clones from each cell type have been named by the nearest gene while the remaining sites are binned as low abundance (LowAbund; grey). The total number of genomic fragments used to identify integration sites are listed atop of each plot. These fragments are generated by restriction endonucleases in 454 sequencing experiments and by sonic shearing in Illumina sequencing experiments. Relative abundances are calculated using the total number of reads associated with clones in 454 sequencing experiments while the number of unique sonic breaks is used in Illumina sequencing experiments.



PBMC

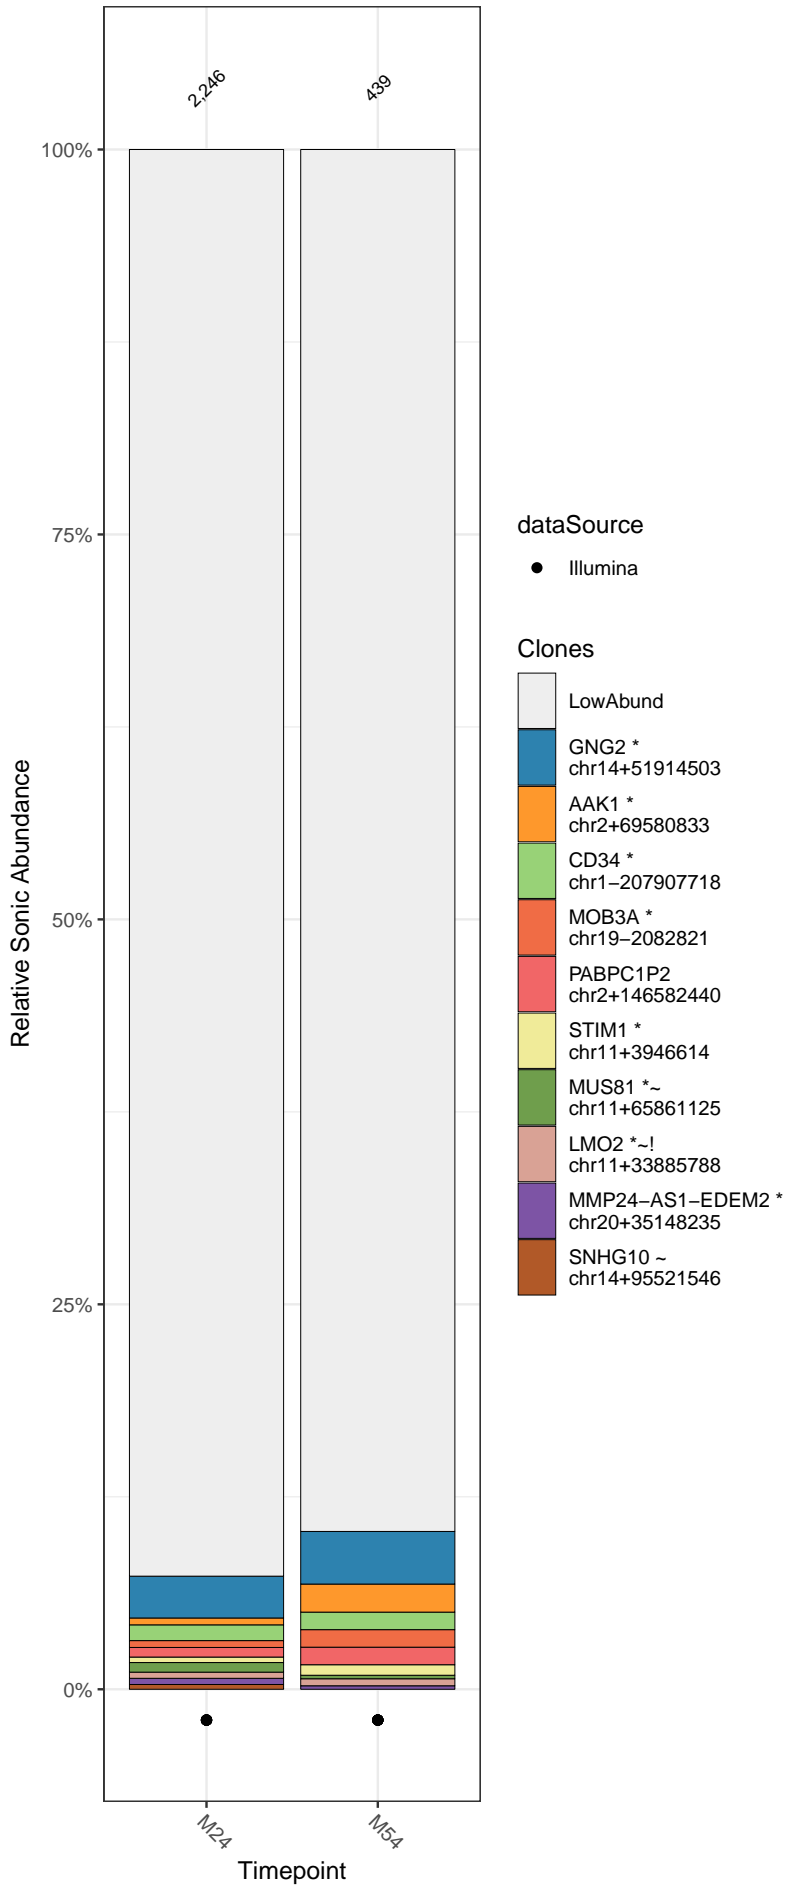

# Longitudinal behavior of major clones

When multiple time points are available, it is of interest to track the behavior of the most abundant clones across different cell types. A plot of the relative abundances of the most abundant 10 clones is shown below. For cases where only a single time point is available, the data is plotted as unlinked points.

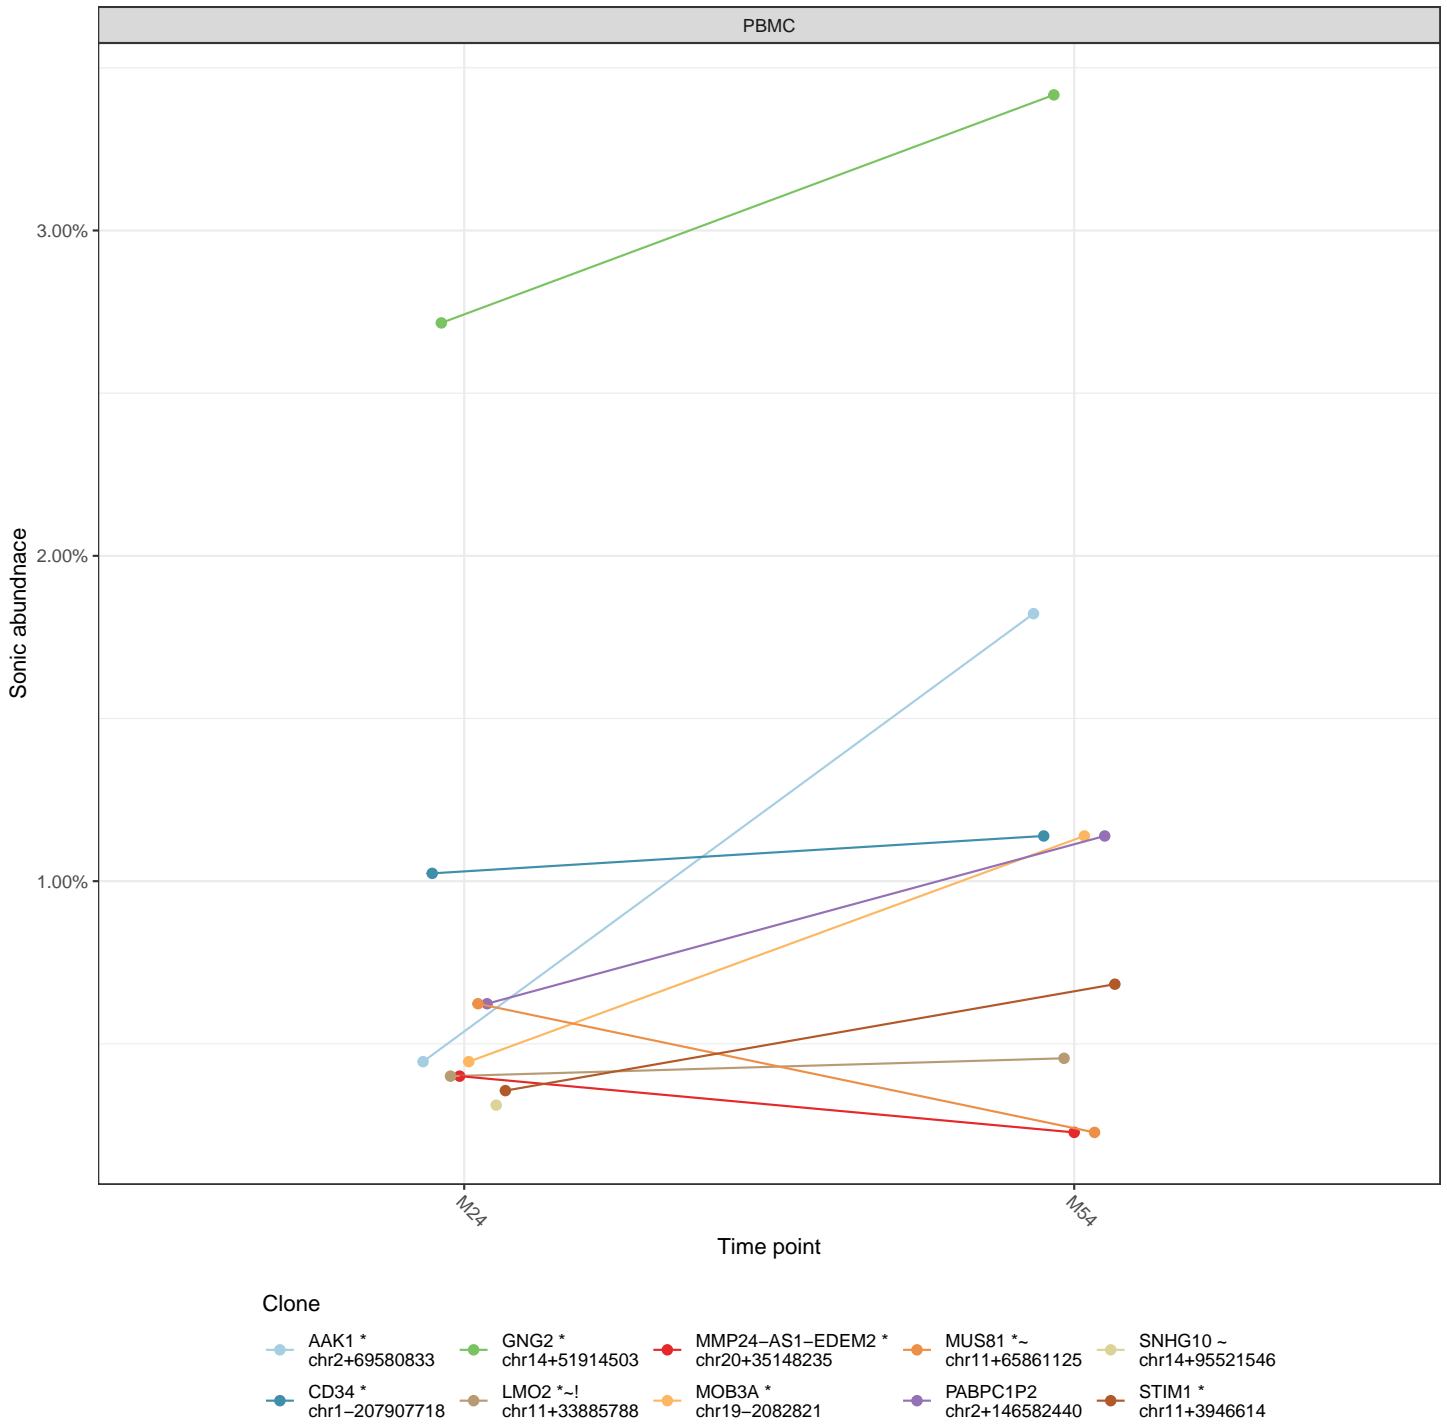

# Integration sites near particular genes of interest

Integration sites near genes that have been associated with adverse events are of particular interest. Below are longitudinal relative abundance plots that focus on the most abundant 5 clones whose nearest genes are LMO2, IKZF1, CCND2, HMGA2, and MECOM.

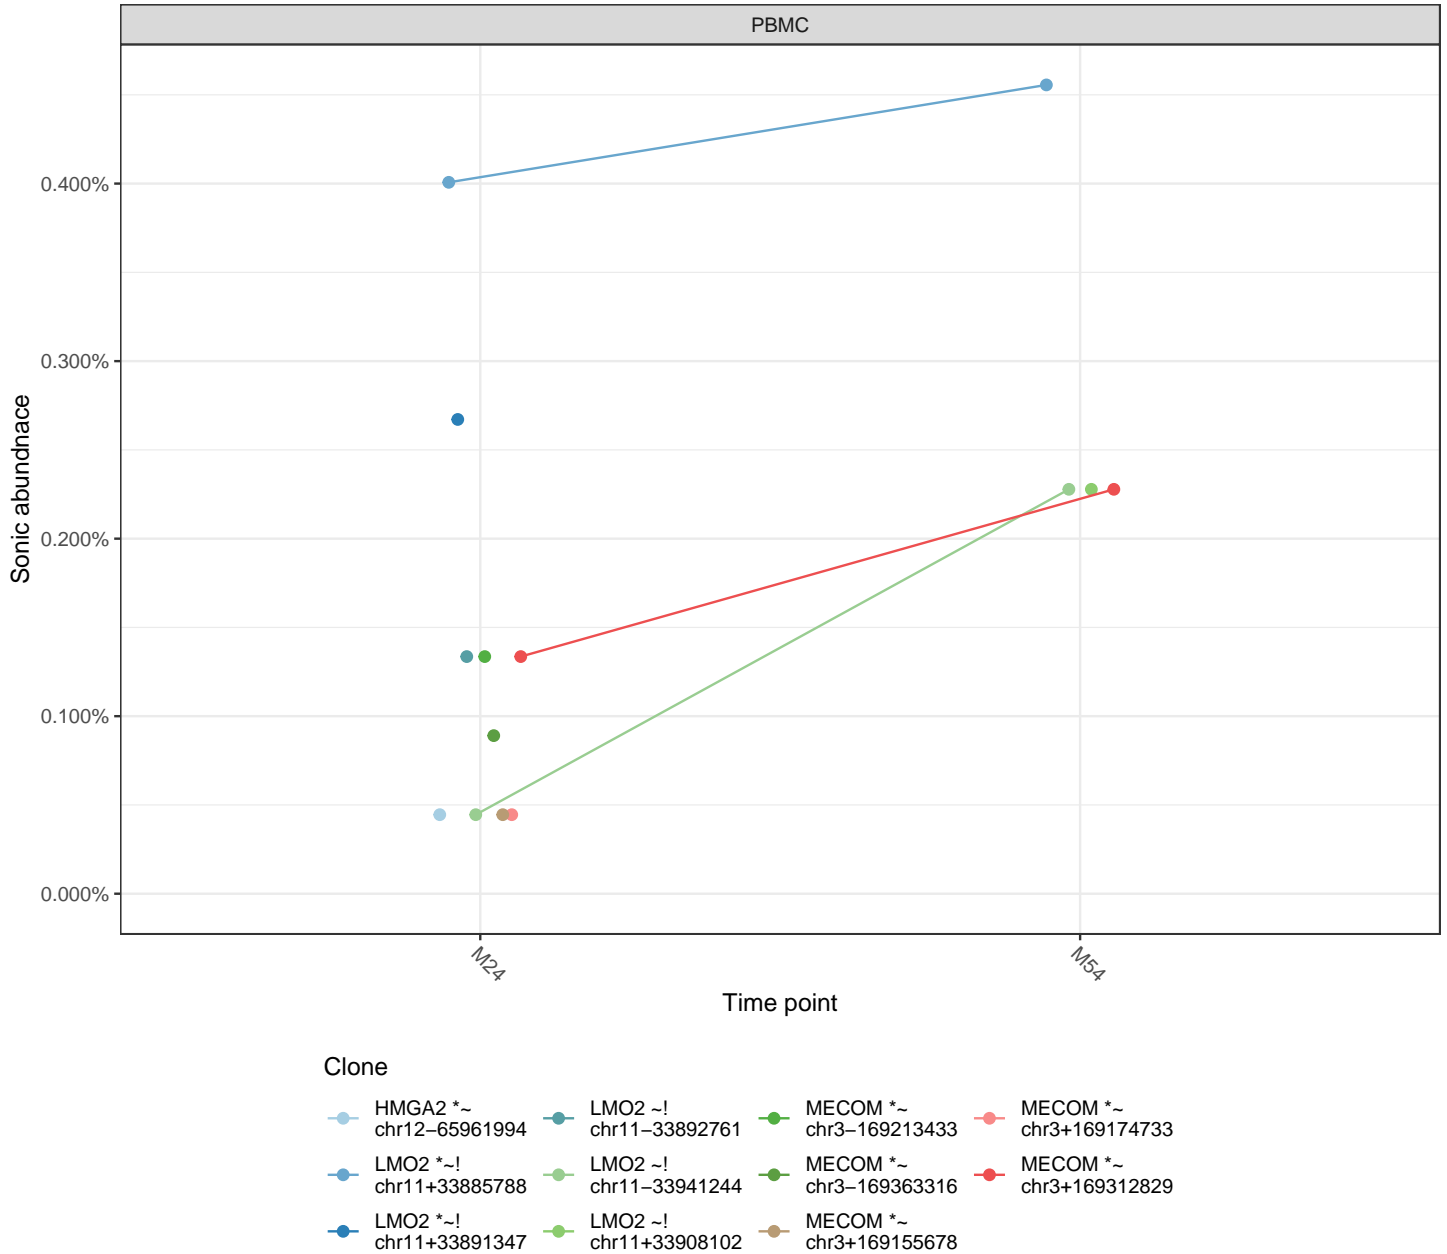

# Sample relative abundance heatmap

Alternatively, the relative abundances of the most abundant 10 clones from each cell sampled type can be visualized as a heat map.

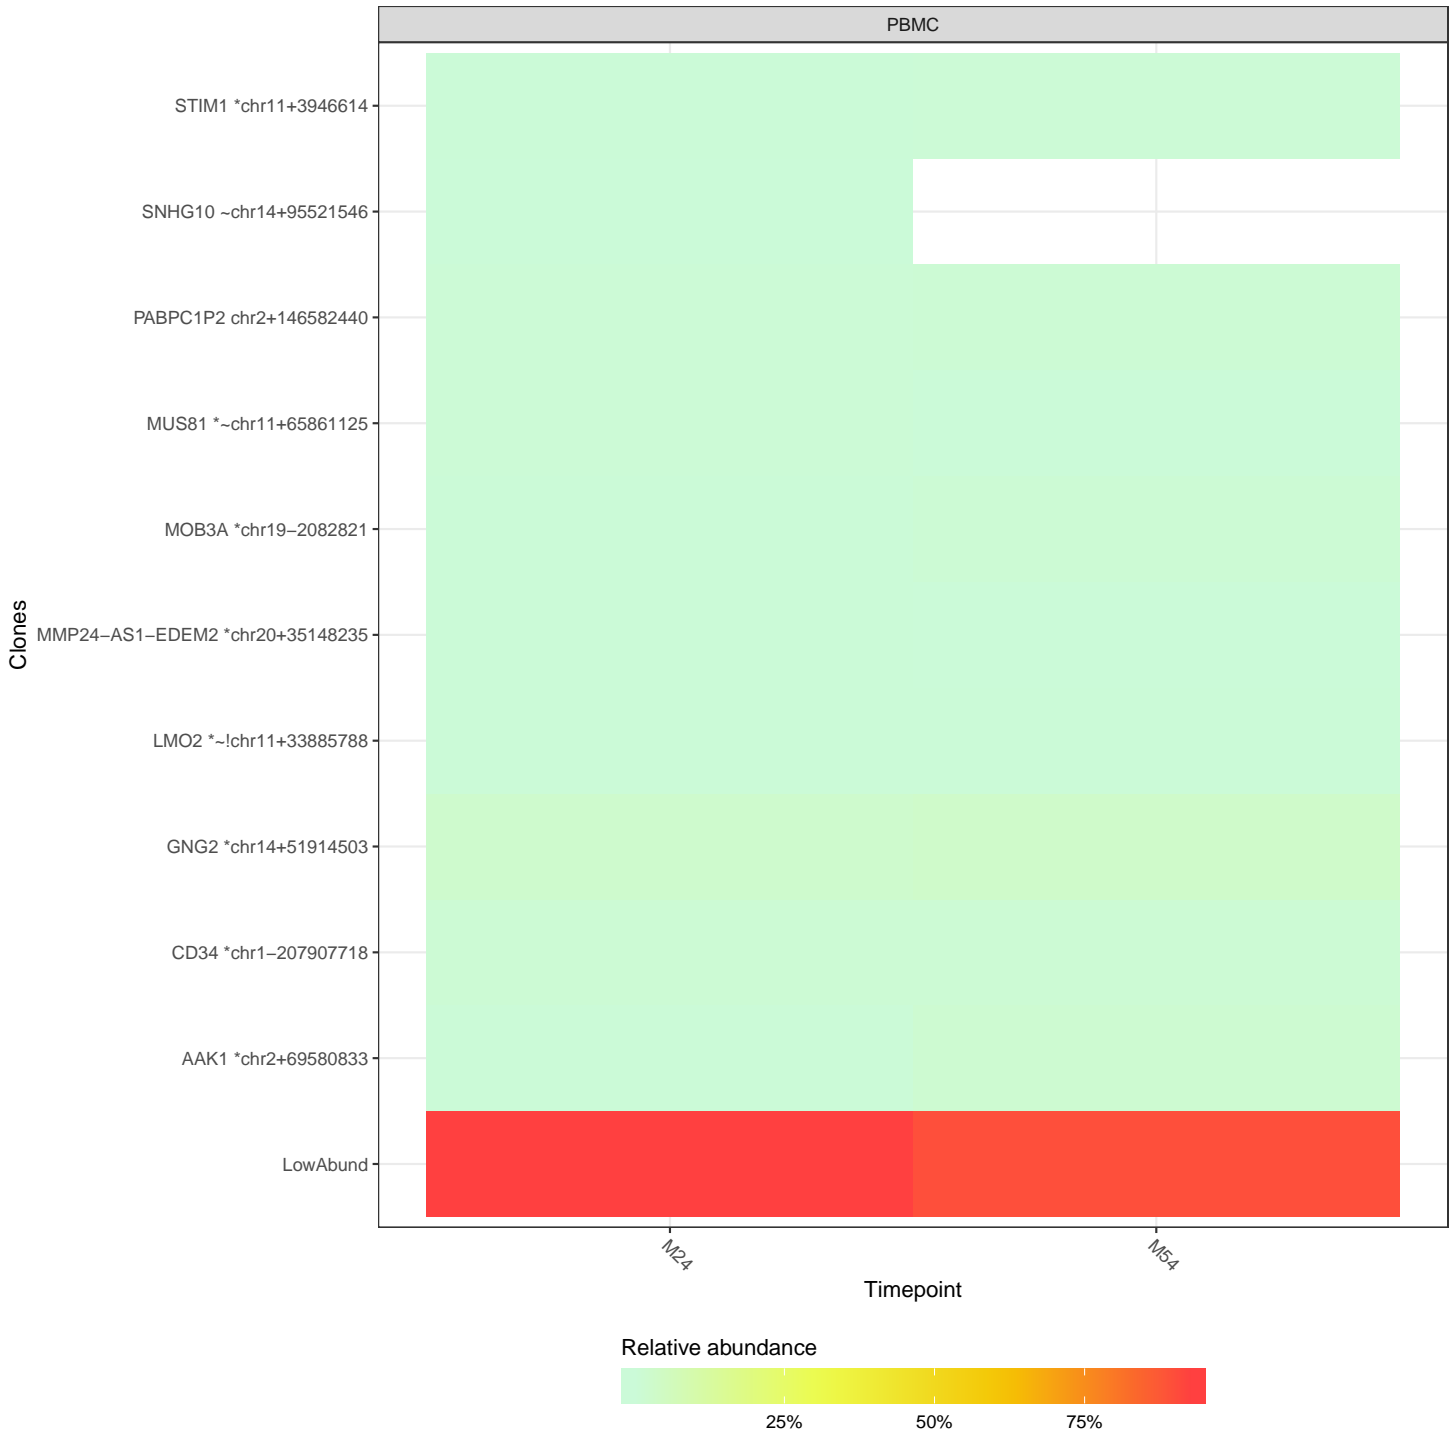

# What are the most frequently occurring gene types in the subject?

The word clouds below illustrate the nearest genes of the most abundant clones from each sample where the numeric ranges represent the upper and lower clonal abundances.

PBMC  
M24 2:61

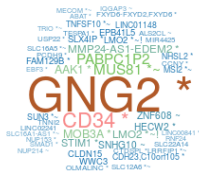

PBMC  
M54 1:15

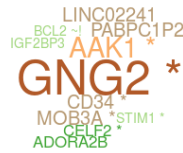

# Multihits

This analysis has been looking at integration sites that can be uniquely mapped. But it is also helpful to look at reads finding multiple equally good alignments in the genome which can be referred to as 'Multihits'. If an integration site occurred within a repeat element (i.e. Alus, LINE, SINE, etc), then it might be helpful to access those sites for potential detrimental effects. These collection of sequences are analyzed separately due to their ambiguity.

No sample contained a multihit grouping which exceeded 20% of the sample's inferred cells.

# Methods

All coordinates are on human genome draft hg38.

Detailed methods can be found these publications:

- Bioinformatics. 2012 Mar 15; 28(6): 755–762.
- Mol Ther Methods Clin Dev. 2017 Mar 17; 4: 17–26.
- Mol Ther Methods Clin Dev. 2017 Mar 17; 4: 39–49.

Analysis software:

- INSPIRED v1.1 (<http://github.com/BushmanLab/INSPIRED>)

Report generation software:

- subjectReport v0.1 (<http://github.com/everettJK/geneTherapySubjectReport>)

# Analysis of integration site distributions and relative clonal abundance for subject p405

*November 02, 2020*

## Contents

|                                                                                                    |           |
|----------------------------------------------------------------------------------------------------|-----------|
| <b>Summary</b>                                                                                     | <b>2</b>  |
| Is there a rich population of progenitor cells delivering mature cells to the periphery? . . . . . | 2         |
| Do any cell clones account for more than 20% of all clones? . . . . .                              | 2         |
| Are any cell clones increasing in proportion over time? . . . . .                                  | 3         |
| <b>Introduction</b>                                                                                | <b>4</b>  |
| <b>Sample Summary</b>                                                                              | <b>5</b>  |
| <b>Tracking of clonal abundances</b>                                                               | <b>6</b>  |
| Relative abundance of cell clones . . . . .                                                        | 6         |
| Longitudinal behavior of major clones . . . . .                                                    | 8         |
| Integration sites near particular genes of interest . . . . .                                      | 9         |
| Sample relative abundance heatmap . . . . .                                                        | 10        |
| <b>What are the most frequently occurring gene types in the subject?</b>                           | <b>11</b> |
| <b>Multihits</b>                                                                                   | <b>12</b> |
| <b>Methods</b>                                                                                     | <b>13</b> |



# Summary

Is there a rich population of progenitor cells delivering mature cells to the periphery?

To provide a simple measure, we ask whether there are  $\geq 1000$  descendants of independent progenitors (i.e. unique integration sites) in minimally fractionated cell specimens (Whole blood, T cells, B cells, NK cells, Neutrophils, Monocytes and PBMC). Cell specimens that pass these criteria are operationally designated Rich.

| Time point | PBMC | Rich |
|------------|------|------|
| M42        | 67   | No   |
| M60        | 225  | No   |

Do any cell clones account for more than 20% of all clones?

For some trials, a reporting criteria is whether any cell clones expand to account for greater than 20% of all clones. The table below highlights samples with relative abundances  $\geq 20\%$  considering only samples with 50 or more inferred cells.

**No clones exceed 20% in any samples.**

# Are any cell clones increasing in proportion over time?

The plot below details the longitudinal sample relative abundances of the most abundant 20 clones where only samples with 50 or more inferred cells are considered.

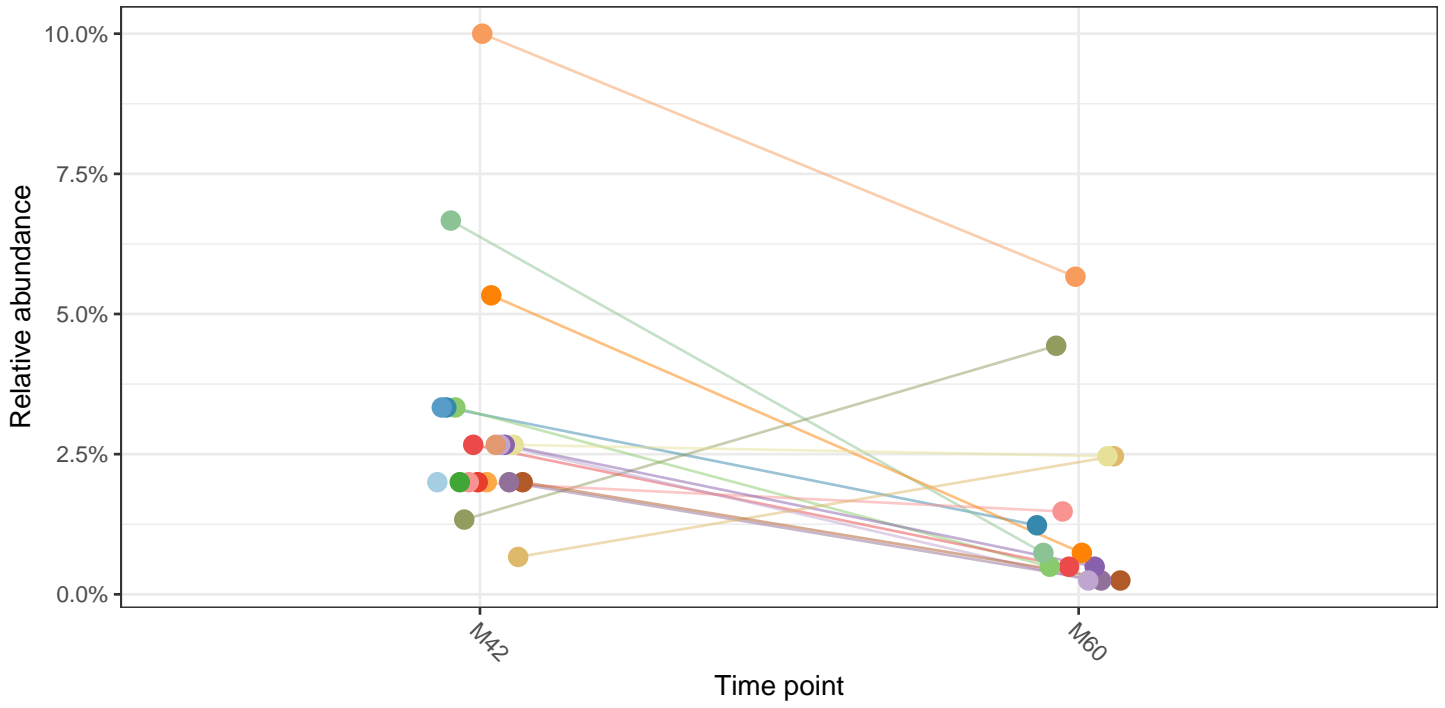

- | Clone                                                                     |                                                                                | Data source                                   |
|---------------------------------------------------------------------------|--------------------------------------------------------------------------------|-----------------------------------------------|
| <span style="color: lightblue;">●</span> PBMC : ADCY7 *<br>chr16+50274899 | <span style="color: orange;">●</span> PBMC : GBAT2 ~<br>chr1+151348335         | <span style="color: black;">●</span> Illumina |
| <span style="color: blue;">●</span> PBMC : ADPRM *<br>chr17+10701196      | <span style="color: orange;">●</span> PBMC : GRAMD1A<br>chr19+34985450         |                                               |
| <span style="color: darkblue;">●</span> PBMC : APOBEC3H<br>chr22+39111276 | <span style="color: orange;">●</span> PBMC : GTSCR1<br>chr18+70621407          |                                               |
| <span style="color: green;">●</span> PBMC : ATP8B1 ~<br>chr18-57832757    | <span style="color: orange;">●</span> PBMC : KCNJ16 *<br>chr17+70102839        |                                               |
| <span style="color: lightgreen;">●</span> PBMC : CAT<br>chr11-34426274    | <span style="color: purple;">●</span> PBMC : LINC01091 *<br>chr4+123924361     |                                               |
| <span style="color: darkgreen;">●</span> PBMC : CDCP1 *<br>chr3+45145375  | <span style="color: purple;">●</span> PBMC : LINC01250<br>chr2-2685441         |                                               |
| <span style="color: olive;">●</span> PBMC : CHRM3 *<br>chr1+239484033     | <span style="color: purple;">●</span> PBMC : LOC105372672 *~<br>chr20-53620723 |                                               |
| <span style="color: pink;">●</span> PBMC : EPB41L3 *~<br>chr18-5468014    | <span style="color: yellowgreen;">●</span> PBMC : NMRAL2P<br>chr3+185959226    |                                               |
| <span style="color: red;">●</span> PBMC : FBXL14<br>chr12+1601983         | <span style="color: yellowgreen;">●</span> PBMC : PRR5 *<br>chr22+44676331     |                                               |
| <span style="color: darkred;">●</span> PBMC : FMNL1 *<br>chr17+45224751   | <span style="color: brown;">●</span> PBMC : TNS4 *<br>chr17+40480205           |                                               |

# Introduction

The attached report describes results of analysis of integration site distributions and relative abundance for samples from gene therapy trials. For cases of gene correction in circulating blood cells, it is possible to harvest cells sequentially from blood to monitor cell populations. Frequency of isolation information can provide information on the clonal structure of the population. This report summarizes results for subject p405 over time points M42, M60 in UCSC genome draft .

The samples studied in this report, the numbers of sequence reads, recovered integration vectors, and unique integration sites available for this subject are shown below. We quantify population clone diversity using Gini coefficients, Shannon index, and UC50. The Gini coefficient provides a measure of inequality in clonal abundance in each sample. The coefficient equals zero when all sites are equally abundant (polyclonal) and increases as fewer sites account for more of the total (oligoclonal). Shannon index is another widely used measure of diversity and it accounts for both abundance and evenness of the integration events. Alternatively, the UC50 is the number of unique clones which make up the top 50% of the sample's abundance. For polyclonal samples, one may expect a low Gini coefficient, high Shannon Index, and high UC50 (proportional to the total number of unique sites identified in the sample).

Under most circumstances only a subset of sites will be sampled. We thus include an estimate of sample size based on frequency of isolation information from the SonicLength method (Berry, 2012). The 'S.chao1' column denotes the estimated lower bound for population size derived using Chao estimate (Chao, 1987). If sample replicates were present then estimates were subjected to jackknife bias correction.

We estimate the numbers of cell clones sampled using the SonicLength method (Berry, 2012); this is summarized in the column "Inferred cells". Integration sites were recovered using ligation mediated PCR after random fragmentation of genomic DNA, which reduces recovery biases compared with restriction enzyme cleavage. Relative abundance was not measured from read counts, which are known to be inaccurate, but from marks introduced into DNA specimens prior to PCR amplification using the SonicLength method PMID:22238265.

We quantify population diversity using Gini coefficients, Shannon index, and UC50. The Gini coefficient provides a measure of inequality in clonal abundance in each sample. The coefficient equals zero when all sites are equally abundant (polyclonal) and increases as fewer sites account for more of the total (oligoclonal). Shannon index is another widely used measure of diversity and it accounts for both abundance and evenness of the integration events. UC50 is the number of clones which make up the top 50% of the sample's abundance. For polyclonal samples, one may expect a low Gini coefficient, high Shannon Index, and high UC50 (proportional to the total number of unique sites identified in the sample).

Integration positions are reported with the format (nearest gene, chromosome, +/-, genomic position) where the nearest gene is the nearest transcriptional boundary to the integration position, '+' refers to integration in the positive orientation and '-' refers to integration in the reverse orientation. Reported distances are signed where where the sign indicates if integrations are upstream (-) or downstream (+, no sign) of the nearest gene. Nearest genes possess additional annotations described in the table below.

| Symbol | Meaning                                             |
|--------|-----------------------------------------------------|
| *      | site is within a transcription unit                 |
| ~      | site is within 50kb of a cancer related gene        |
| !      | nearest gene was associated with lymphoma in humans |

# Sample Summary

The table below provides population statistics for each analyzed sample. Occasionally multiple samples from the same cell fraction and time point are analyzed where only the sample with greatest number of inferred cells is considered in this report. Sample rows with NA listed in the TotalReads, InferredCells, UniqueSite and other columns represent samples which were analyzed but no integration sites were identified.

| GTSP     | dataSource | Timepoint | CellType | TotalReads | InferredCells | UniqueSites | Gini  | Chao1 | Shannon | Pielou | UC50 | Included | runDate    | VCN   |
|----------|------------|-----------|----------|------------|---------------|-------------|-------|-------|---------|--------|------|----------|------------|-------|
| GTSP3605 | Illumina   | M42       | PBMC     | 1,190,436  | 150           | 67          | 0.412 | 118   | 3.86    | 0.919  | 14   | yes      | 2020-10-12 | 0.490 |
| GTSP3606 | Illumina   | M60       | PBMC     | 665,842    | 406           | 225         | 0.380 | 675   | 5.03    | 0.930  | 43   | yes      | 2020-10-12 | 0.496 |

# Tracking of clonal abundances

## Relative abundance of cell clones

The relative abundances of cell clones is summarized in the stacked bar plots below. The cell fraction studied is named at the top of each plot and the time points are marked at the bottom. The different bars in each panel show the major cell clones, as marked by integration sites where the x-axis indicates time points and the y-axis is scaled by proportion of the total cells sampled. The top 10 most abundant clones from each cell type have been named by the nearest gene while the remaining sites are binned as low abundance (LowAbund; grey). The total number of genomic fragments used to identify integration sites are listed atop of each plot. These fragments are generated by restriction endonucleases in 454 sequencing experiments and by sonic shearing in Illumina sequencing experiments. Relative abundances are calculated using the total number of reads associated with clones in 454 sequencing experiments while the number of unique sonic breaks is used in Illumina sequencing experiments.

PBMC

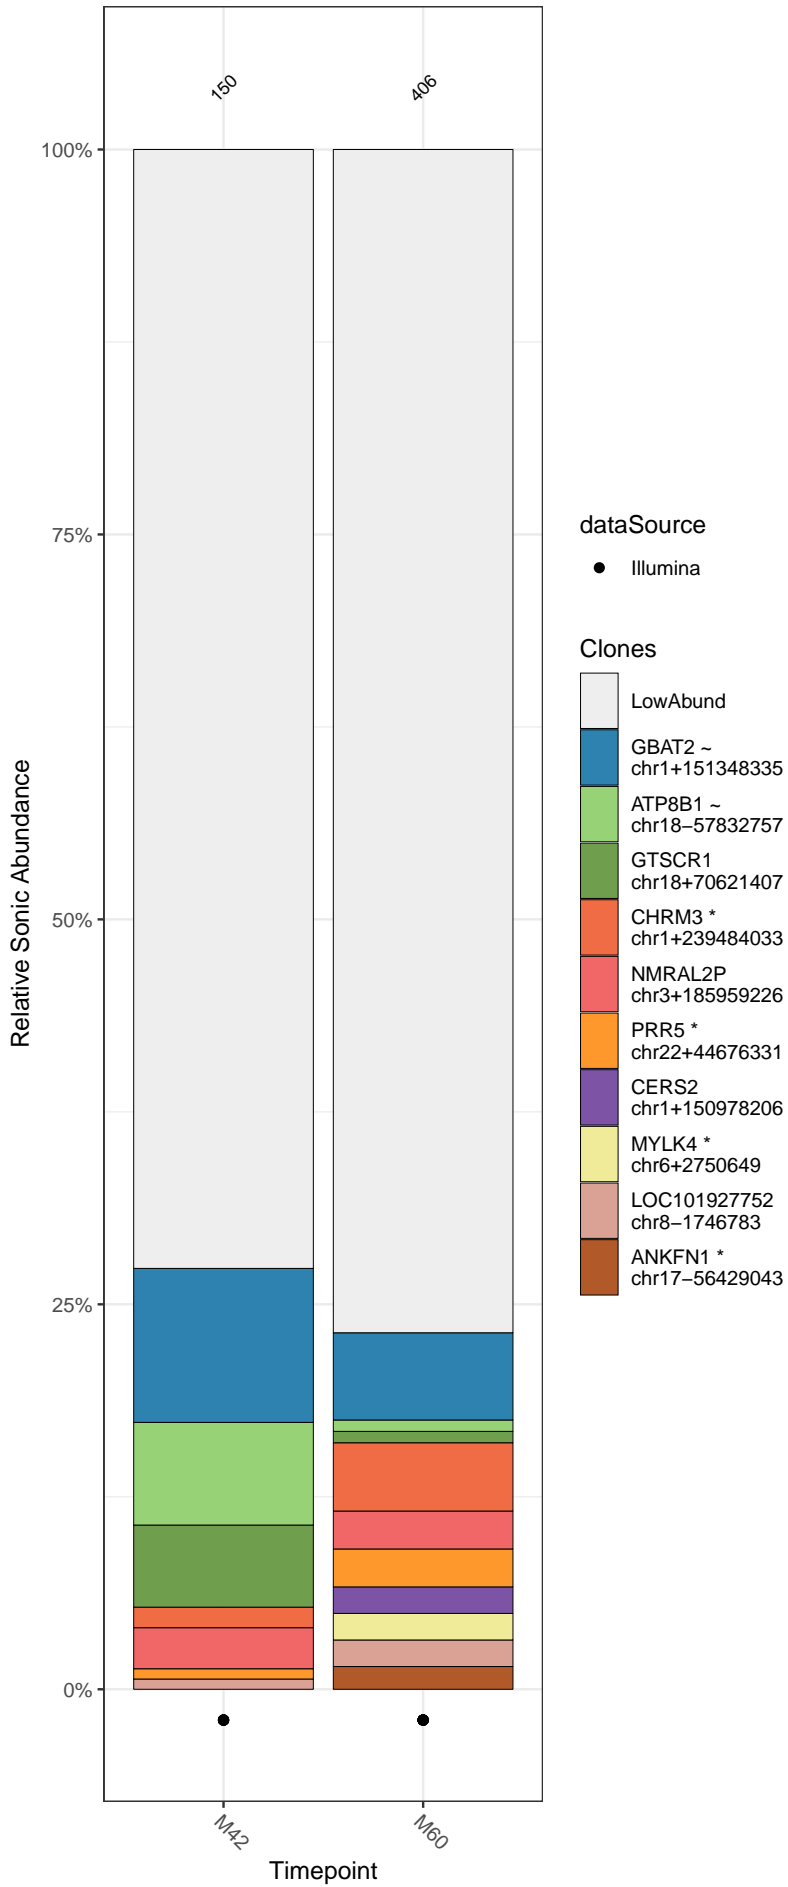

# Longitudinal behavior of major clones

When multiple time points are available, it is of interest to track the behavior of the most abundant clones across different cell types. A plot of the relative abundances of the most abundant 10 clones is shown below. For cases where only a single time point is available, the data is plotted as unlinked points.

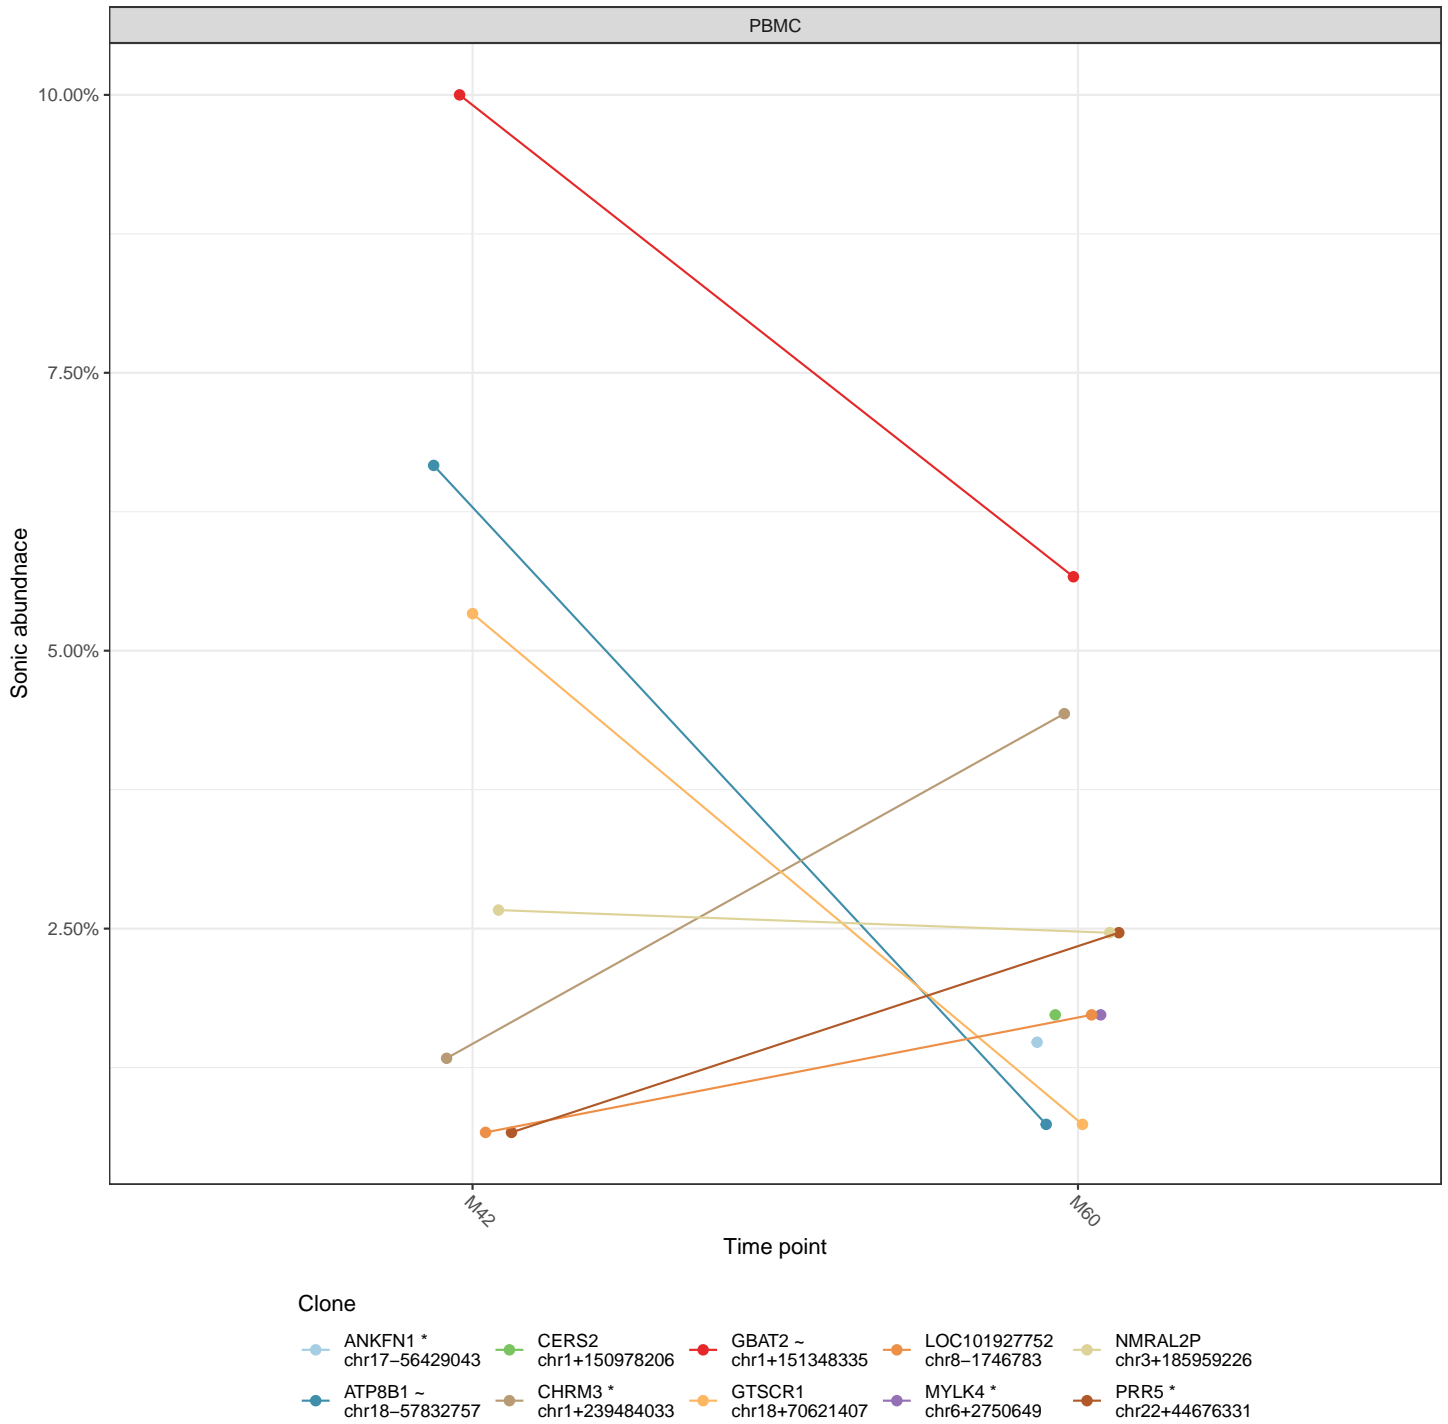

## Integration sites near particular genes of interest

Integration sites near genes that have been associated with adverse events are of particular interest. Below are longitudinal relative abundance plots that focus on the most abundant 5 clones whose nearest genes are LMO2, IKZF1, CCND2, HMGA2, and MECOM.

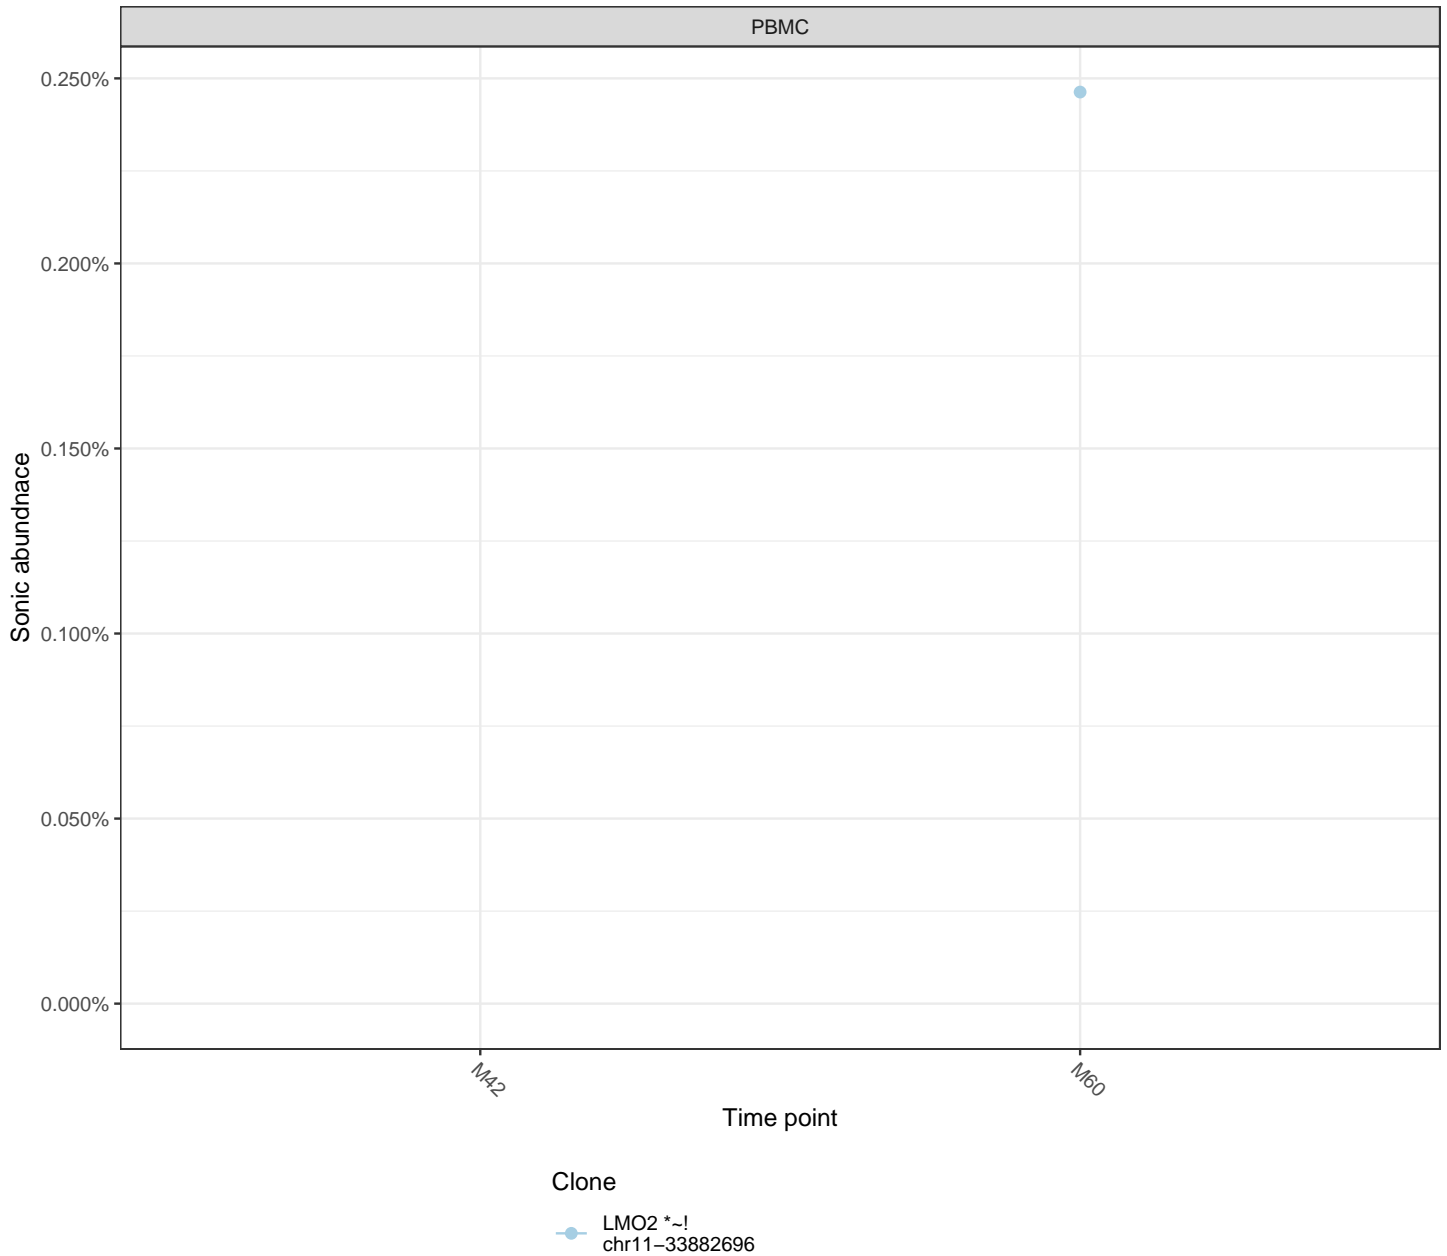



# Sample relative abundance heatmap

Alternatively, the relative abundances of the most abundant 10 clones from each cell sampled type can be visualized as a heat map.

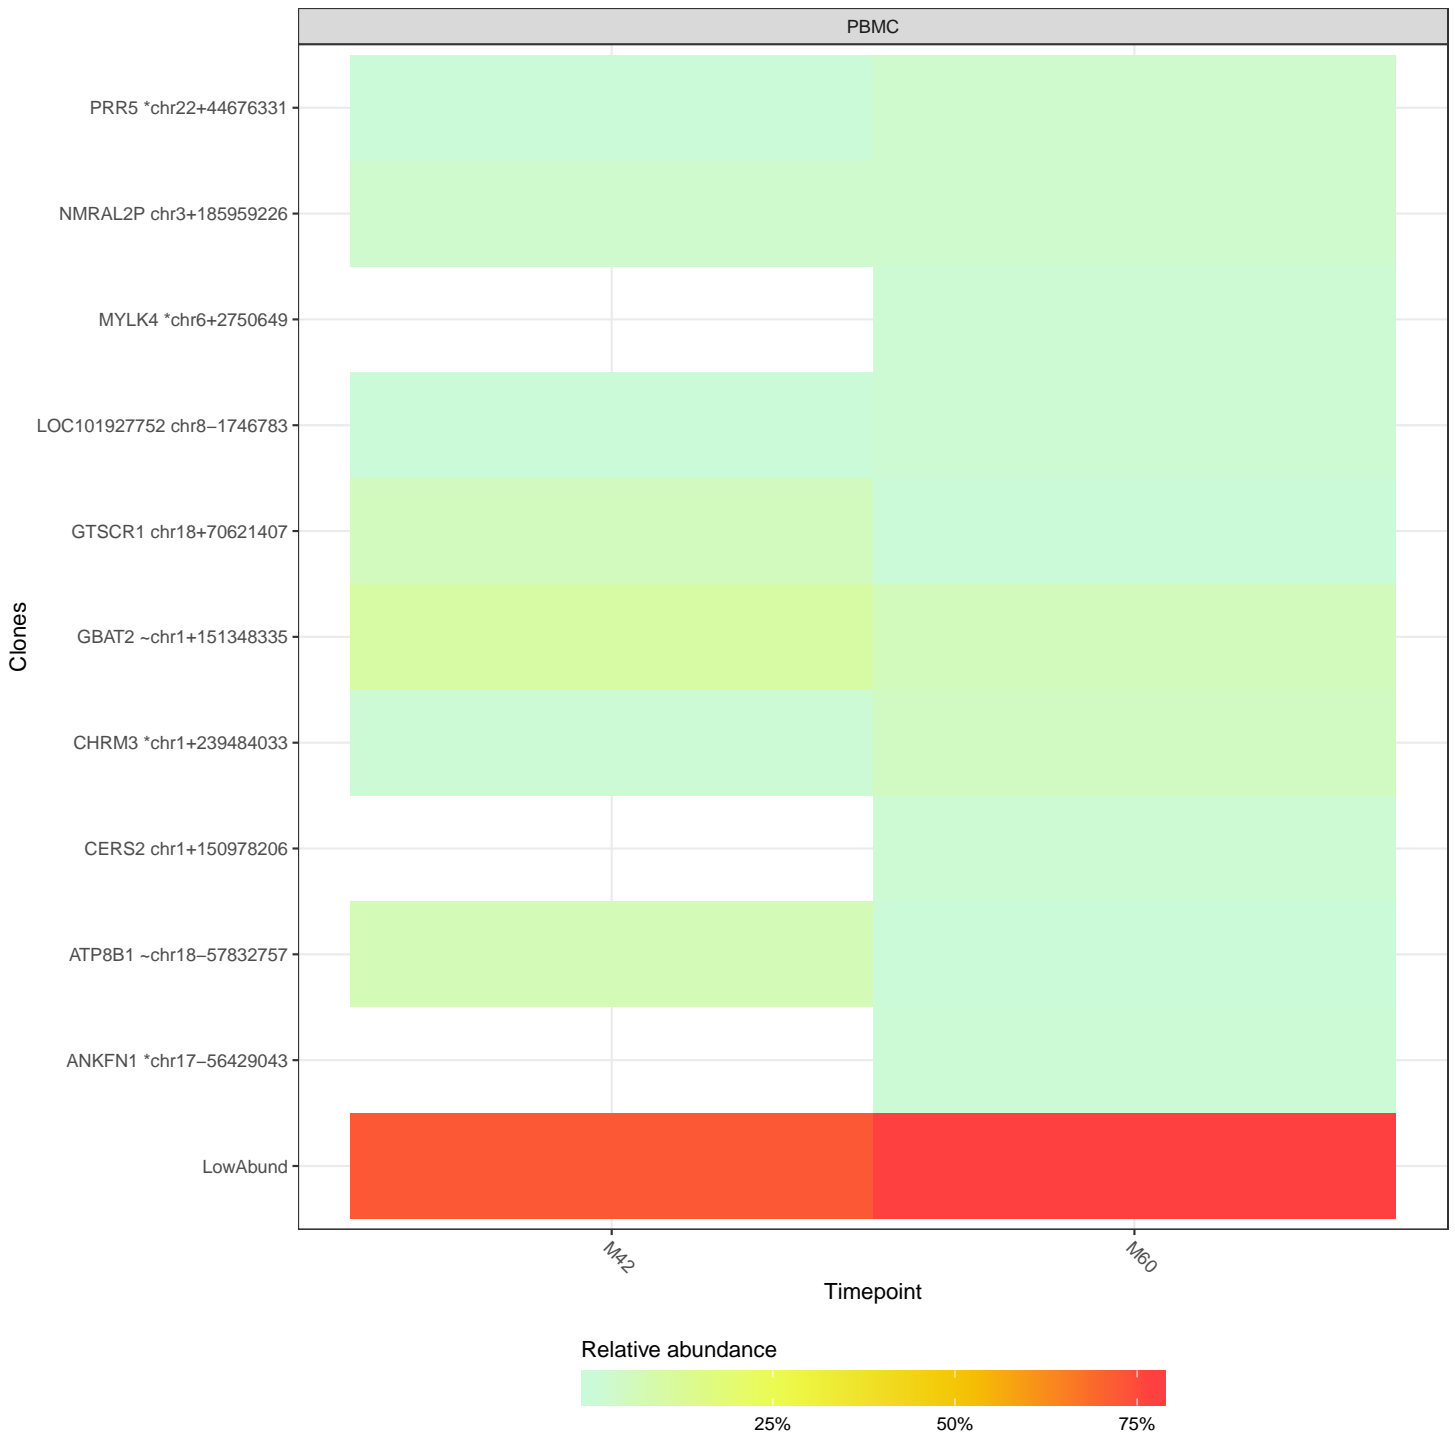

# What are the most frequently occurring gene types in the subject?

The word clouds below illustrate the nearest genes of the most abundant clones from each sample where the numeric ranges represent the upper and lower clonal abundances.

PBMC  
M42 1:15

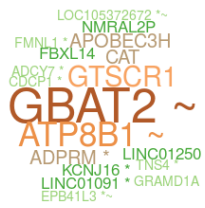

PBMC  
M60 1:23

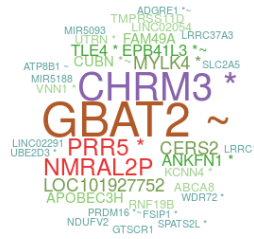

# Multihits

This analysis has been looking at integration sites that can be uniquely mapped. But it is also helpful to look at reads finding multiple equally good alignments in the genome which can be referred to as 'Multihits'. If an integration site occurred within a repeat element (i.e. Alus, LINE, SINE, etc), then it might be helpful to access those sites for potential detrimental effects. These collection of sequences are analyzed separately due to their ambiguity.

No sample contained a multihit grouping which exceeded 20% of the sample's inferred cells.

# Methods

All coordinates are on human genome draft hg38.

Detailed methods can be found these publications:

- Bioinformatics. 2012 Mar 15; 28(6): 755–762.
- Mol Ther Methods Clin Dev. 2017 Mar 17; 4: 17–26.
- Mol Ther Methods Clin Dev. 2017 Mar 17; 4: 39–49.

Analysis software:

- INSPIRED v1.1 (<http://github.com/BushmanLab/INSPIRED>)

Report generation software:

- subjectReport v0.1 (<http://github.com/everettJK/geneTherapySubjectReport>)

# Analysis of integration site distributions and relative clonal abundance for subject p406

*November 02, 2020*

## Contents

|                                                                                                    |           |
|----------------------------------------------------------------------------------------------------|-----------|
| <b>Summary</b>                                                                                     | <b>2</b>  |
| Is there a rich population of progenitor cells delivering mature cells to the periphery? . . . . . | 2         |
| Do any cell clones account for more than 20% of all clones? . . . . .                              | 2         |
| Are any cell clones increasing in proportion over time? . . . . .                                  | 3         |
| <b>Introduction</b>                                                                                | <b>4</b>  |
| <b>Sample Summary</b>                                                                              | <b>5</b>  |
| <b>Tracking of clonal abundances</b>                                                               | <b>6</b>  |
| Relative abundance of cell clones . . . . .                                                        | 6         |
| Longitudinal behavior of major clones . . . . .                                                    | 8         |
| Integration sites near particular genes of interest . . . . .                                      | 9         |
| Sample relative abundance heatmap . . . . .                                                        | 10        |
| <b>What are the most frequently occurring gene types in the subject?</b>                           | <b>11</b> |
| <b>Multihits</b>                                                                                   | <b>12</b> |
| <b>Methods</b>                                                                                     | <b>13</b> |

# Summary

Is there a rich population of progenitor cells delivering mature cells to the periphery?

To provide a simple measure, we ask whether there are  $\geq 1000$  descendants of independent progenitors (i.e. unique integration sites) in minimally fractionated cell specimens (Whole blood, T cells, B cells, NK cells, Neutrophils, Monocytes and PBMC). Cell specimens that pass these criteria are operationally designated Rich.

| Time point | PBMC | Rich |
|------------|------|------|
| M24        | 74   | No   |
| M84        | 196  | No   |

Do any cell clones account for more than 20% of all clones?

For some trials, a reporting criteria is whether any cell clones expand to account for greater than 20% of all clones. The table below highlights samples with relative abundances  $\geq 20\%$  considering only samples with 50 or more inferred cells.

**No clones exceed 20% in any samples.**

# Are any cell clones increasing in proportion over time?

The plot below details the longitudinal sample relative abundances of the most abundant 20 clones where only samples with 50 or more inferred cells are considered.

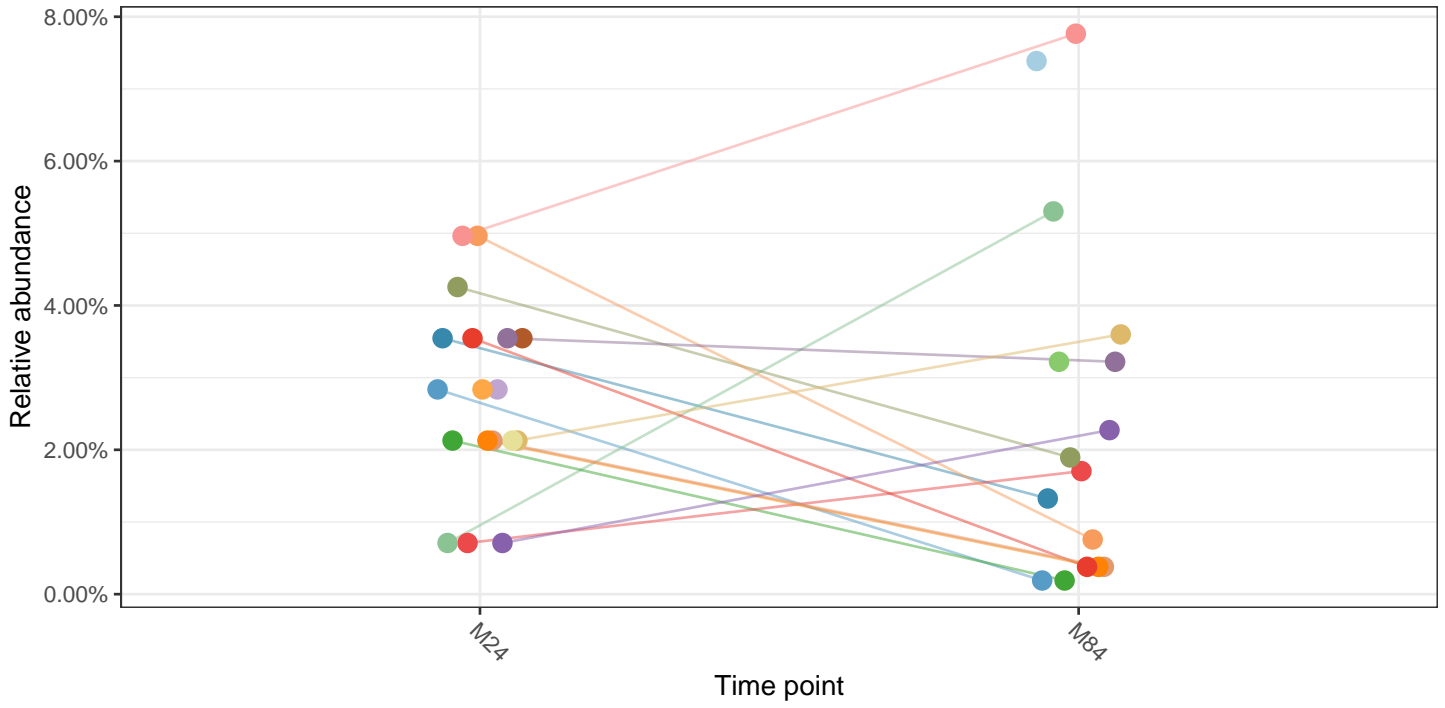

### Clone

- PBMC : C4orf45  
chr4+159051983
- PBMC : CD200 ~  
chr3-112394407
- PBMC : DACH1  
chr13+71878987
- PBMC : DACH1 \*  
chr13-71796973
- PBMC : DCLRE1A \*  
chr10-113853775
- PBMC : DNAJC15 \*  
chr13+43050017
- PBMC : DNM3 \*  
chr1+172359258
- PBMC : LINC01478 \*  
chr18+44459984
- PBMC : LINC01745  
chr1-232705277
- PBMC : LOC101559451 \*  
chr17+4704779
- PBMC : LRRC29 \*~  
chr16-67217669
- PBMC : MYT1L \*  
chr2-1797549
- PBMC : NABP1 \*  
chr2+191678299
- PBMC : NFE2  
chr12-54305007
- PBMC : PHLDB2 \*  
chr3+111924217
- PBMC : PPP2R2B \*  
chr5+146796774
- PBMC : RGL2 \*~  
chr6+33299350
- PBMC : SETDB2,SETDB2-PHF11 \*  
chr13-49447684
- PBMC : SH3BP2 \*~  
chr4-2812840
- PBMC : TTC39A \*~  
chr1-51305179

### Data source

- Illumina

# Introduction

The attached report describes results of analysis of integration site distributions and relative abundance for samples from gene therapy trials. For cases of gene correction in circulating blood cells, it is possible to harvest cells sequentially from blood to monitor cell populations. Frequency of isolation information can provide information on the clonal structure of the population. This report summarizes results for subject p406 over time points M24, M84 in UCSC genome draft .

The samples studied in this report, the numbers of sequence reads, recovered integration vectors, and unique integration sites available for this subject are shown below. We quantify population clone diversity using Gini coefficients, Shannon index, and UC50. The Gini coefficient provides a measure of inequality in clonal abundance in each sample. The coefficient equals zero when all sites are equally abundant (polyclonal) and increases as fewer sites account for more of the total (oligoclonal). Shannon index is another widely used measure of diversity and it accounts for both abundance and evenness of the integration events. Alternatively, the UC50 is the number of unique clones which make up the top 50% of the sample's abundance. For polyclonal samples, one may expect a low Gini coefficient, high Shannon Index, and high UC50 (proportional to the total number of unique sites identified in the sample).

Under most circumstances only a subset of sites will be sampled. We thus include an estimate of sample size based on frequency of isolation information from the SonicLength method (Berry, 2012). The 'S.chao1' column denotes the estimated lower bound for population size derived using Chao estimate (Chao, 1987). If sample replicates were present then estimates were subjected to jackknife bias correction.

We estimate the numbers of cell clones sampled using the SonicLength method (Berry, 2012); this is summarized in the column "Inferred cells". Integration sites were recovered using ligation mediated PCR after random fragmentation of genomic DNA, which reduces recovery biases compared with restriction enzyme cleavage. Relative abundance was not measured from read counts, which are known to be inaccurate, but from marks introduced into DNA specimens prior to PCR amplification using the SonicLength method PMID:22238265.

We quantify population diversity using Gini coefficients, Shannon index, and UC50. The Gini coefficient provides a measure of inequality in clonal abundance in each sample. The coefficient equals zero when all sites are equally abundant (polyclonal) and increases as fewer sites account for more of the total (oligoclonal). Shannon index is another widely used measure of diversity and it accounts for both abundance and evenness of the integration events. UC50 is the number of clones which make up the top 50% of the sample's abundance. For polyclonal samples, one may expect a low Gini coefficient, high Shannon Index, and high UC50 (proportional to the total number of unique sites identified in the sample).

Integration positions are reported with the format (nearest gene, chromosome, +/-, genomic position) where the nearest gene is the nearest transcriptional boundary to the integration position, '+' refers to integration in the positive orientation and '-' refers to integration in the reverse orientation. Reported distances are signed where where the sign indicates if integrations are upstream (-) or downstream (+, no sign) of the nearest gene. Nearest genes possess additional annotations described in the table below.

| Symbol | Meaning                                             |
|--------|-----------------------------------------------------|
| *      | site is within a transcription unit                 |
| ~      | site is within 50kb of a cancer related gene        |
| !      | nearest gene was associated with lymphoma in humans |



# Sample Summary

The table below provides population statistics for each analyzed sample. Occasionally multiple samples from the same cell fraction and time point are analyzed where only the sample with greatest number of inferred cells is considered in this report. Sample rows with NA listed in the TotalReads, InferredCells, UniqueSite and other columns represent samples which were analyzed but no integration sites were identified.

| GTSP     | dataSource | Timepoint | CellType | TotalReads | InferredCells | UniqueSites | Gini  | Chao1 | Shannon | Pielou | UC50 | Included | runDate    | VCN   |
|----------|------------|-----------|----------|------------|---------------|-------------|-------|-------|---------|--------|------|----------|------------|-------|
| GTSP3607 | Illumina   | M24       | PBMC     | 202,923    | 141           | 74          | 0.352 | 133   | 4.07    | 0.945  | 17   | yes      | 2020-10-14 | 0.172 |
| GTSP3608 | Illumina   | M84       | PBMC     | 289,008    | 528           | 196         | 0.532 | 384   | 4.58    | 0.867  | 21   | yes      | 2020-10-14 | 0.483 |

# Tracking of clonal abundances

## Relative abundance of cell clones

The relative abundances of cell clones is summarized in the stacked bar plots below. The cell fraction studied is named at the top of each plot and the time points are marked at the bottom. The different bars in each panel show the major cell clones, as marked by integration sites where the x-axis indicates time points and the y-axis is scaled by proportion of the total cells sampled. The top 10 most abundant clones from each cell type have been named by the nearest gene while the remaining sites are binned as low abundance (LowAbund; grey). The total number of genomic fragments used to identify integration sites are listed atop of each plot. These fragments are generated by restriction endonucleases in 454 sequencing experiments and by sonic shearing in Illumina sequencing experiments. Relative abundances are calculated using the total number of reads associated with clones in 454 sequencing experiments while the number of unique sonic breaks is used in Illumina sequencing experiments.

PBMC

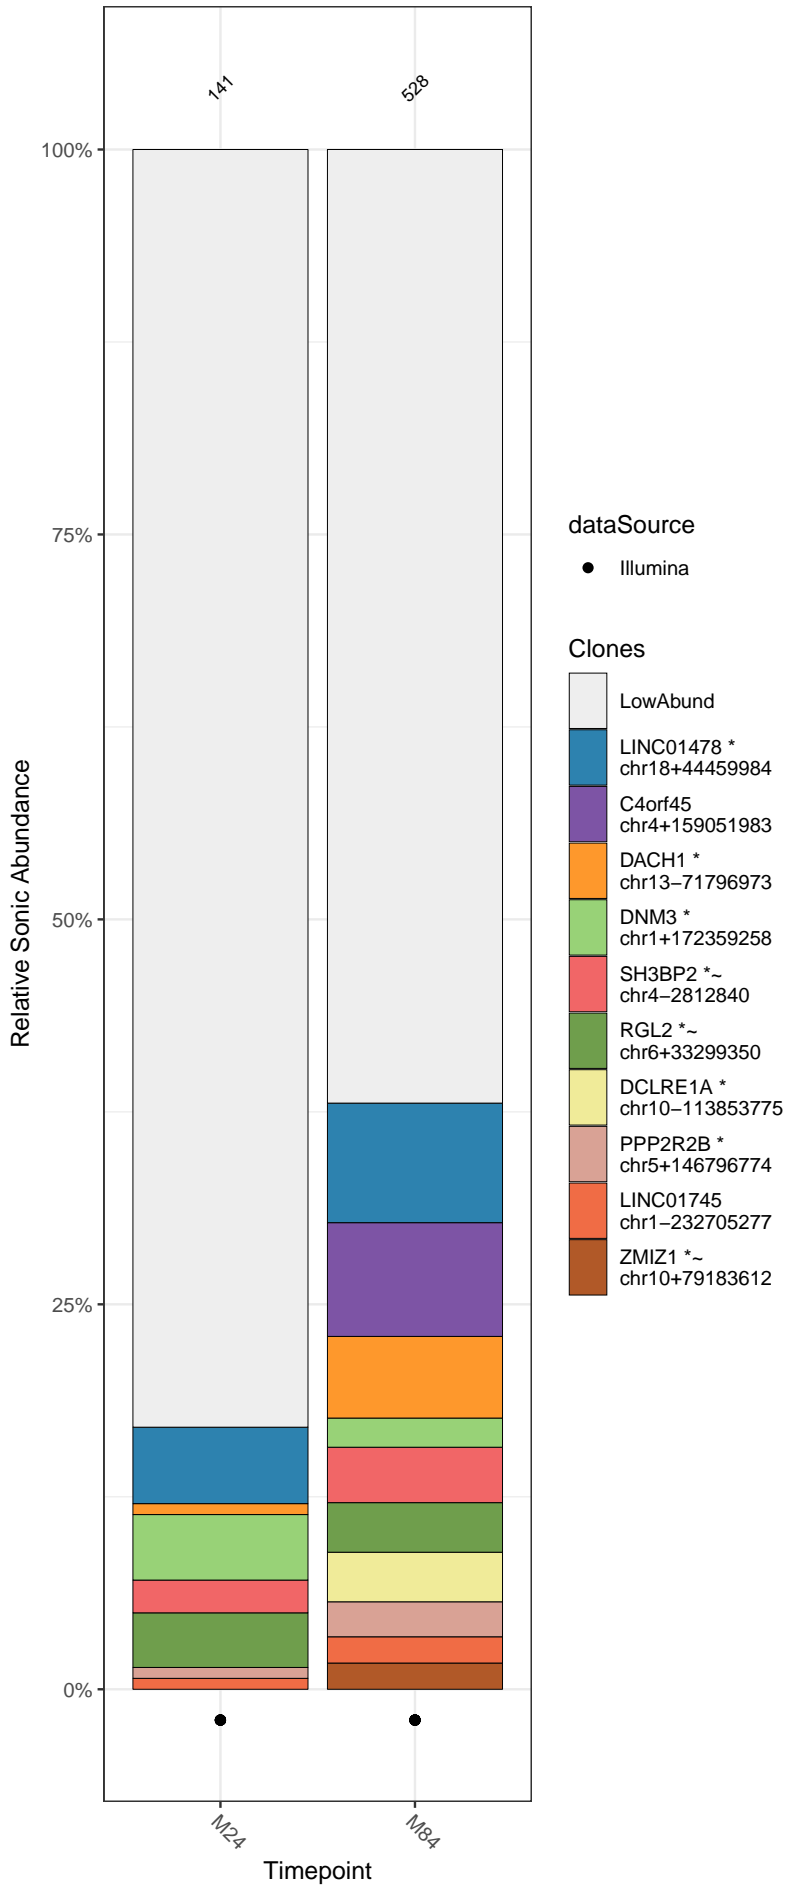

# Longitudinal behavior of major clones

When multiple time points are available, it is of interest to track the behavior of the most abundant clones across different cell types. A plot of the relative abundances of the most abundant 10 clones is shown below. For cases where only a single time point is available, the data is plotted as unlinked points.

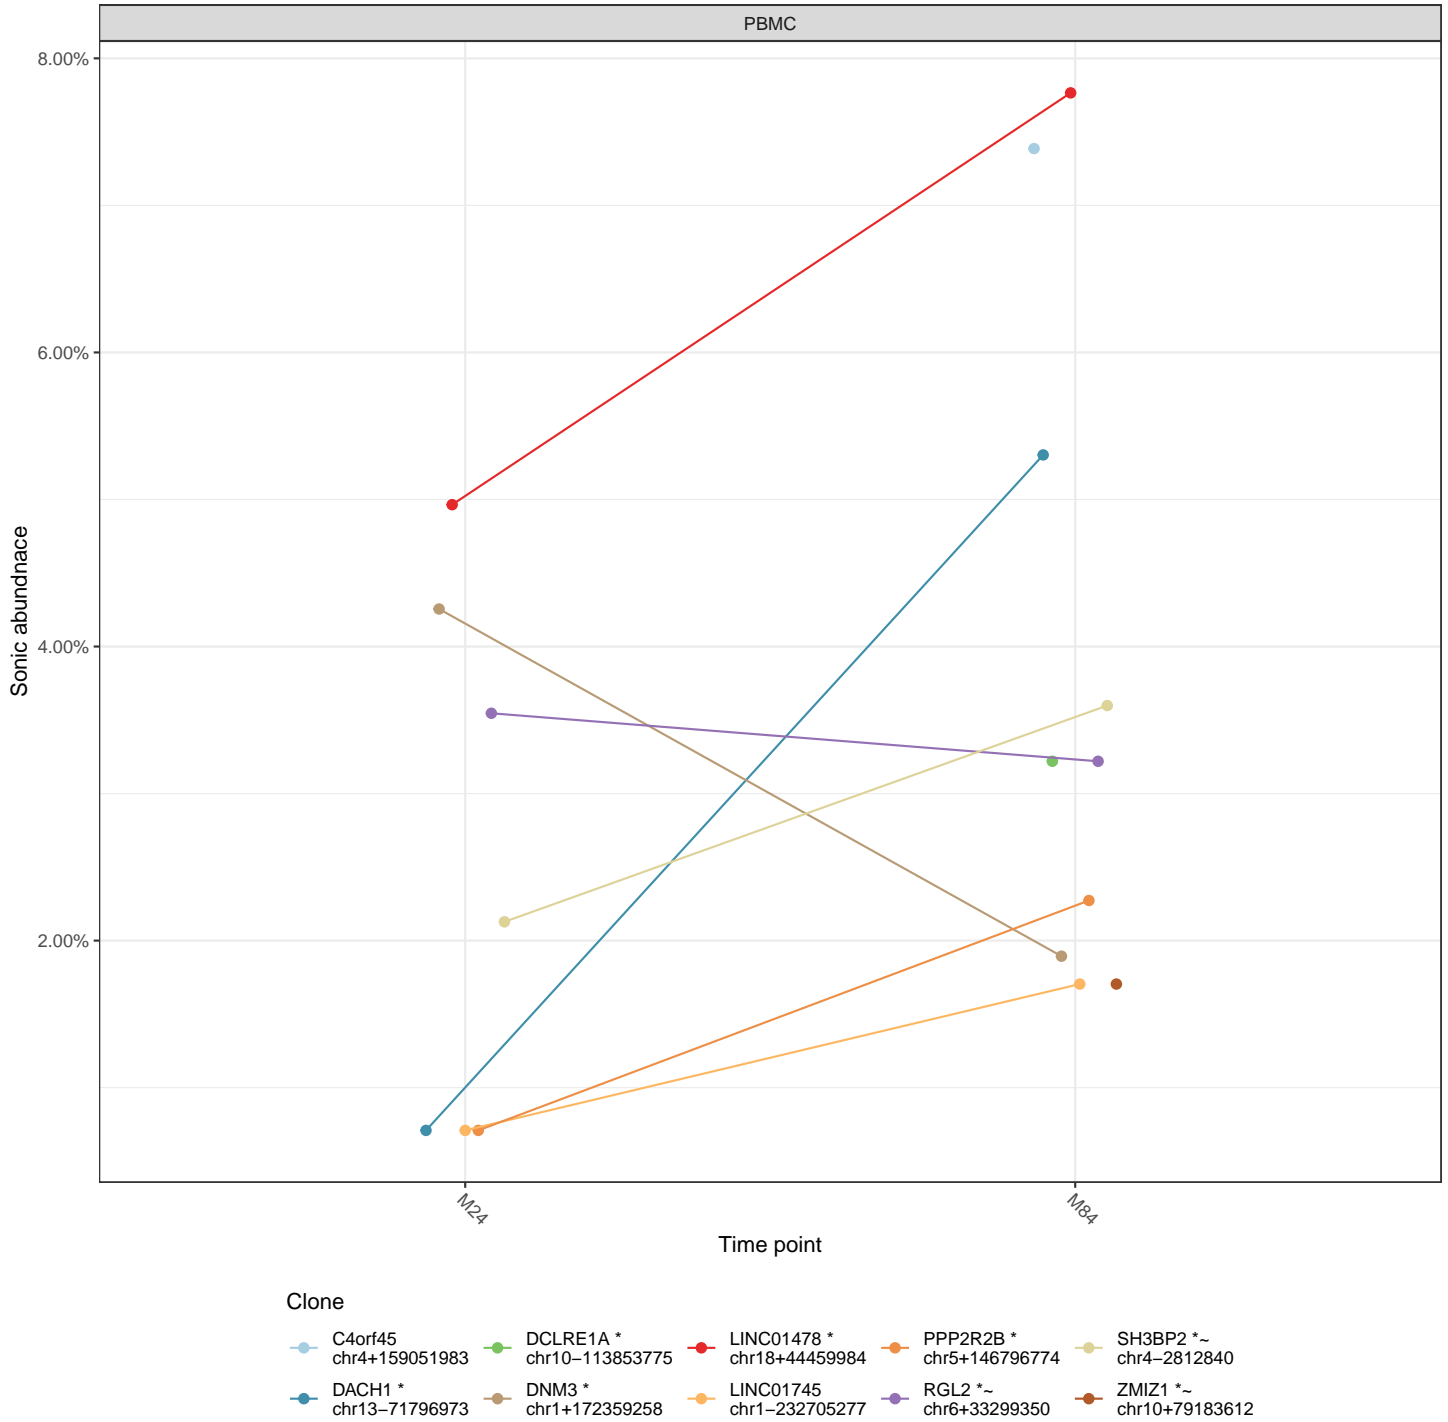

## Integration sites near particular genes of interest

Integration sites near genes that have been associated with adverse events are of particular interest. Below are longitudinal relative abundance plots that focus on the most abundant 5 clones whose nearest genes are LMO2, IKZF1, CCND2, HMGA2, and MECOM.

No integration sites were found near LMO2, IKZF1, CCND2, HMGA2 or MECOM

# Sample relative abundance heatmap

Alternatively, the relative abundances of the most abundant 10 clones from each cell sampled type can be visualized as a heat map.

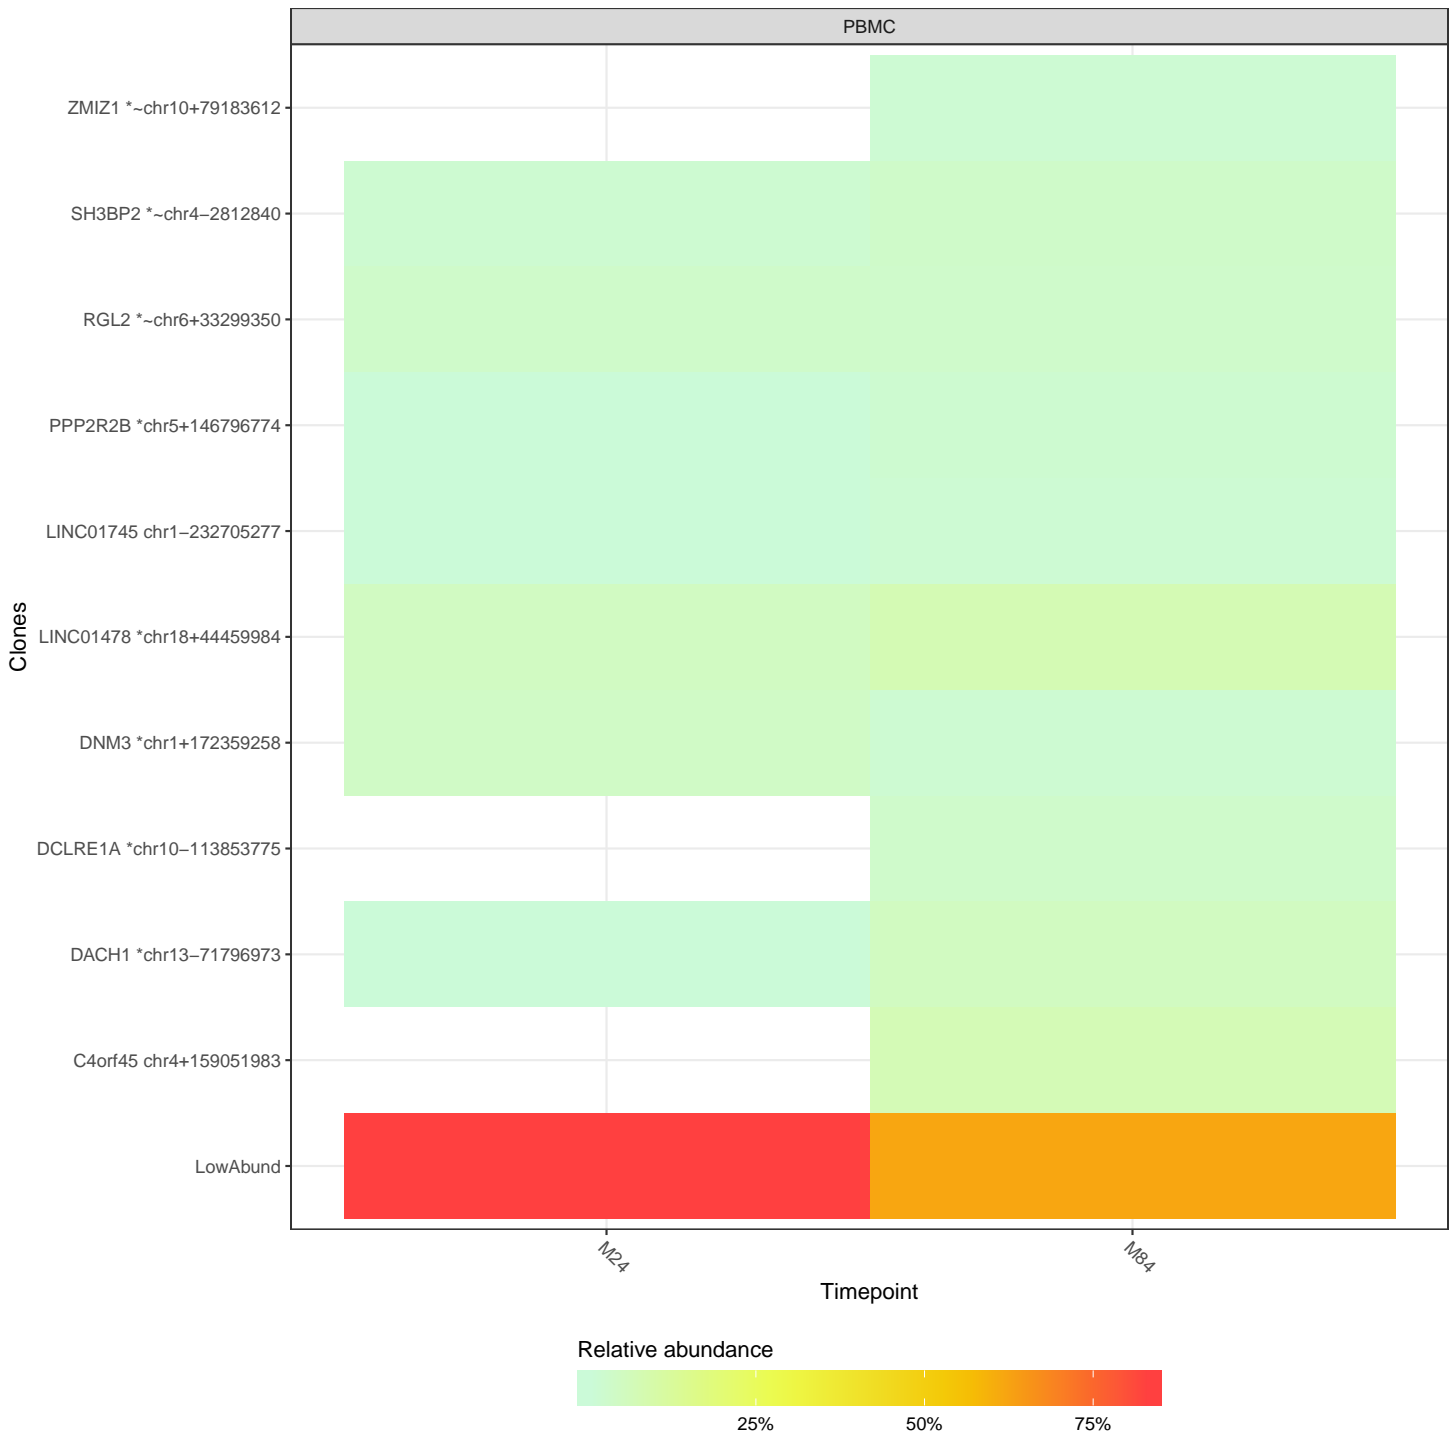

# What are the most frequently occurring gene types in the subject?

The word clouds below illustrate the nearest genes of the most abundant clones from each sample where the numeric ranges represent the upper and lower clonal abundances.

PBMC  
M24 1:7

PBMC  
M84 1:41

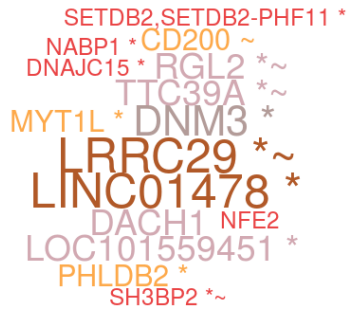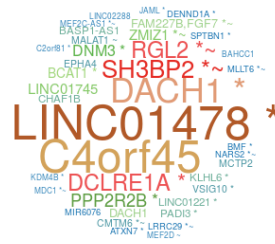

# Multihits

This analysis has been looking at integration sites that can be uniquely mapped. But it is also helpful to look at reads finding multiple equally good alignments in the genome which can be referred to as 'Multihits'. If an integration site occurred within a repeat element (i.e. Alus, LINE, SINE, etc), then it might be helpful to access those sites for potential detrimental effects. These collection of sequences are analyzed separately due to their ambiguity.

No sample contained a multihit grouping which exceeded 20% of the sample's inferred cells.



# Methods

All coordinates are on human genome draft hg38.

Detailed methods can be found these publications:

- Bioinformatics. 2012 Mar 15; 28(6): 755–762.
- Mol Ther Methods Clin Dev. 2017 Mar 17; 4: 17–26.
- Mol Ther Methods Clin Dev. 2017 Mar 17; 4: 39–49.

Analysis software:

- INSPIRED v1.1 (<http://github.com/BushmanLab/INSPIRED>)

Report generation software:

- subjectReport v0.1 (<http://github.com/everettJK/geneTherapySubjectReport>)

# Analysis of integration site distributions and relative clonal abundance for subject p407

*November 02, 2020*

## Contents

|                                                                                                    |           |
|----------------------------------------------------------------------------------------------------|-----------|
| <b>Summary</b>                                                                                     | <b>2</b>  |
| Is there a rich population of progenitor cells delivering mature cells to the periphery? . . . . . | 2         |
| Do any cell clones account for more than 20% of all clones? . . . . .                              | 2         |
| Are any cell clones increasing in proportion over time? . . . . .                                  | 3         |
| <b>Introduction</b>                                                                                | <b>4</b>  |
| <b>Sample Summary</b>                                                                              | <b>5</b>  |
| <b>Tracking of clonal abundances</b>                                                               | <b>6</b>  |
| Relative abundance of cell clones . . . . .                                                        | 6         |
| Longitudinal behavior of major clones . . . . .                                                    | 8         |
| Integration sites near particular genes of interest . . . . .                                      | 9         |
| Sample relative abundance heatmap . . . . .                                                        | 10        |
| <b>What are the most frequently occurring gene types in the subject?</b>                           | <b>11</b> |
| <b>Multihits</b>                                                                                   | <b>12</b> |
| <b>Methods</b>                                                                                     | <b>13</b> |

# Summary

Is there a rich population of progenitor cells delivering mature cells to the periphery?

To provide a simple measure, we ask whether there are  $\geq 1000$  descendants of independent progenitors (i.e. unique integration sites) in minimally fractionated cell specimens (Whole blood, T cells, B cells, NK cells, Neutrophils, Monocytes and PBMC). Cell specimens that pass these criteria are operationally designated Rich.

| Time point | PBMC | Rich |
|------------|------|------|
| M24        | 25   | No   |
| M96        | 57   | No   |

Do any cell clones account for more than 20% of all clones?

For some trials, a reporting criteria is whether any cell clones expand to account for greater than 20% of all clones. The table below highlights samples with relative abundances  $\geq 20\%$  considering only samples with 50 or more inferred cells.

| IntSite         | Abundance | Relative abundance | time point | Cell type | Nearest gene | Distance (KB) | Nearest oncogene | Distance (KB) |
|-----------------|-----------|--------------------|------------|-----------|--------------|---------------|------------------|---------------|
| chr1+8947510    | 78        | 26.6%              | M24        | PBMC      | CA6          | 0.00          | ENO1             | -68.80        |
| chr13+100586636 | 83        | 28.3%              | M24        | PBMC      | GGACT        | 0.00          | FGF14            | 1134.20       |
| chr3+45106737   | 73        | 24.9%              | M24        | PBMC      | CDCP1        | 0.00          | ZDHHC3           | -130.60       |
| chr13+100586636 | 797       | 31.4%              | M96        | PBMC      | GGACT        | 0.00          | FGF14            | 1134.20       |

# Are any cell clones increasing in proportion over time?

The plot below details the longitudinal sample relative abundances of the most abundant 20 clones where only samples with 50 or more inferred cells are considered.

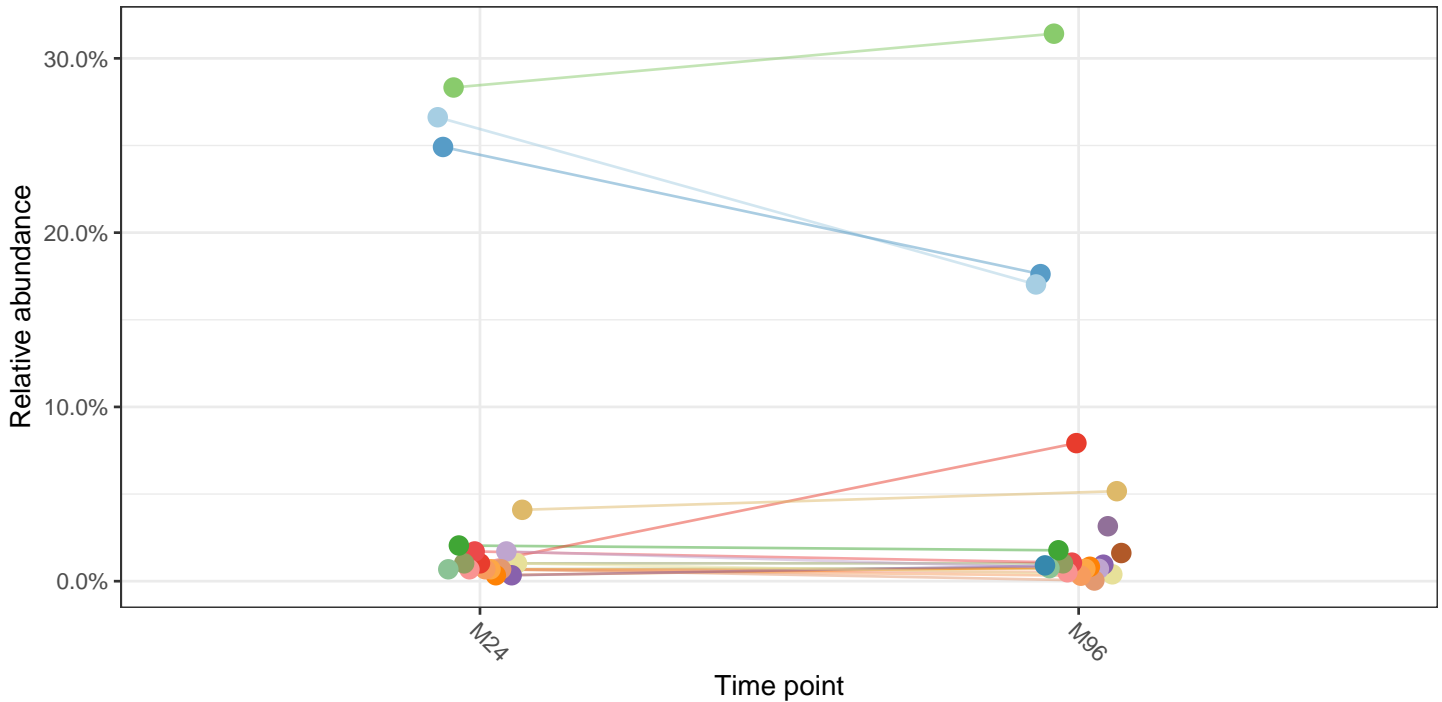

# Introduction

The attached report describes results of analysis of integration site distributions and relative abundance for samples from gene therapy trials. For cases of gene correction in circulating blood cells, it is possible to harvest cells sequentially from blood to monitor cell populations. Frequency of isolation information can provide information on the clonal structure of the population. This report summarizes results for subject p407 over time points M24, M96 in UCSC genome draft .

The samples studied in this report, the numbers of sequence reads, recovered integration vectors, and unique integration sites available for this subject are shown below. We quantify population clone diversity using Gini coefficients, Shannon index, and UC50. The Gini coefficient provides a measure of inequality in clonal abundance in each sample. The coefficient equals zero when all sites are equally abundant (polyclonal) and increases as fewer sites account for more of the total (oligoclonal). Shannon index is another widely used measure of diversity and it accounts for both abundance and evenness of the integration events. Alternatively, the UC50 is the number of unique clones which make up the top 50% of the sample's abundance. For polyclonal samples, one may expect a low Gini coefficient, high Shannon Index, and high UC50 (proportional to the total number of unique sites identified in the sample).

Under most circumstances only a subset of sites will be sampled. We thus include an estimate of sample size based on frequency of isolation information from the SonicLength method (Berry, 2012). The 'S.chao1' column denotes the estimated lower bound for population size derived using Chao estimate (Chao, 1987). If sample replicates were present then estimates were subjected to jackknife bias correction.

We estimate the numbers of cell clones sampled using the SonicLength method (Berry, 2012); this is summarized in the column "Inferred cells". Integration sites were recovered using ligation mediated PCR after random fragmentation of genomic DNA, which reduces recovery biases compared with restriction enzyme cleavage. Relative abundance was not measured from read counts, which are known to be inaccurate, but from marks introduced into DNA specimens prior to PCR amplification using the SonicLength method PMID:22238265.

We quantify population diversity using Gini coefficients, Shannon index, and UC50. The Gini coefficient provides a measure of inequality in clonal abundance in each sample. The coefficient equals zero when all sites are equally abundant (polyclonal) and increases as fewer sites account for more of the total (oligoclonal). Shannon index is another widely used measure of diversity and it accounts for both abundance and evenness of the integration events. UC50 is the number of clones which make up the top 50% of the sample's abundance. For polyclonal samples, one may expect a low Gini coefficient, high Shannon Index, and high UC50 (proportional to the total number of unique sites identified in the sample).

Integration positions are reported with the format (nearest gene, chromosome, +/-, genomic position) where the nearest gene is the nearest transcriptional boundary to the integration position, '+' refers to integration in the positive orientation and '-' refers to integration in the reverse orientation. Reported distances are signed where where the sign indicates if integrations are upstream (-) or downstream (+, no sign) of the nearest gene. Nearest genes possess additional annotations described in the table below.

| Symbol | Meaning                                             |
|--------|-----------------------------------------------------|
| *      | site is within a transcription unit                 |
| ~      | site is within 50kb of a cancer related gene        |
| !      | nearest gene was associated with lymphoma in humans |

# Sample Summary

The table below provides population statistics for each analyzed sample. Occasionally multiple samples from the same cell fraction and time point are analyzed where only the sample with greatest number of inferred cells is considered in this report. Sample rows with NA listed in the TotalReads, InferredCells, UniqueSite and other columns represent samples which were analyzed but no integration sites were identified.

| GTSP     | dataSource | Timepoint | CellType | TotalReads | InferredCells | UniqueSites | Gini  | Chao1 | Shannon | Pielou | UC50 | Included | runDate    | VCN   |
|----------|------------|-----------|----------|------------|---------------|-------------|-------|-------|---------|--------|------|----------|------------|-------|
| GTSP3609 | Illumina   | M24       | PBMC     | 233,479    | 293           | 25          | 0.753 | 28    | 1.94    | 0.603  | 2    | yes      | 2020-10-14 | 0.401 |
| GTSP3610 | Illumina   | M96       | PBMC     | 482,939    | 2,537         | 57          | 0.844 | 92    | 2.33    | 0.576  | 3    | yes      | 2020-10-28 | 0.519 |

# Tracking of clonal abundances

## Relative abundance of cell clones

The relative abundances of cell clones is summarized in the stacked bar plots below. The cell fraction studied is named at the top of each plot and the time points are marked at the bottom. The different bars in each panel show the major cell clones, as marked by integration sites where the x-axis indicates time points and the y-axis is scaled by proportion of the total cells sampled. The top 10 most abundant clones from each cell type have been named by the nearest gene while the remaining sites are binned as low abundance (LowAbund; grey). The total number of genomic fragments used to identify integration sites are listed atop of each plot. These fragments are generated by restriction endonucleases in 454 sequencing experiments and by sonic shearing in Illumina sequencing experiments. Relative abundances are calculated using the total number of reads associated with clones in 454 sequencing experiments while the number of unique sonic breaks is used in Illumina sequencing experiments.

PBMC

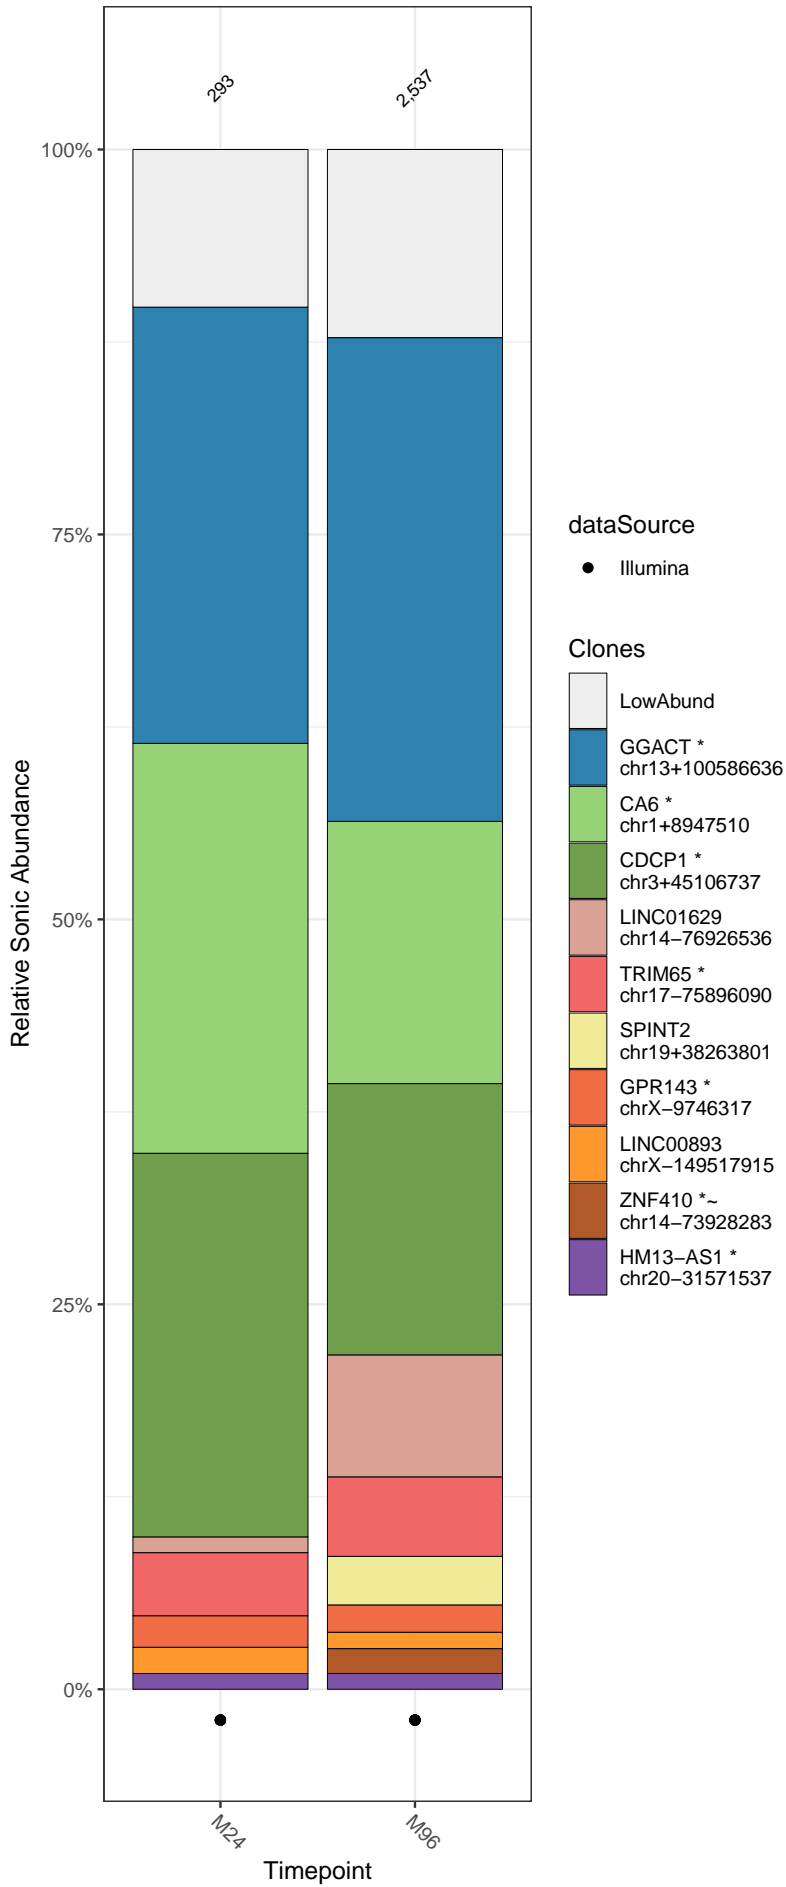



# Longitudinal behavior of major clones

When multiple time points are available, it is of interest to track the behavior of the most abundant clones across different cell types. A plot of the relative abundances of the most abundant 10 clones is shown below. For cases where only a single time point is available, the data is plotted as unlinked points.

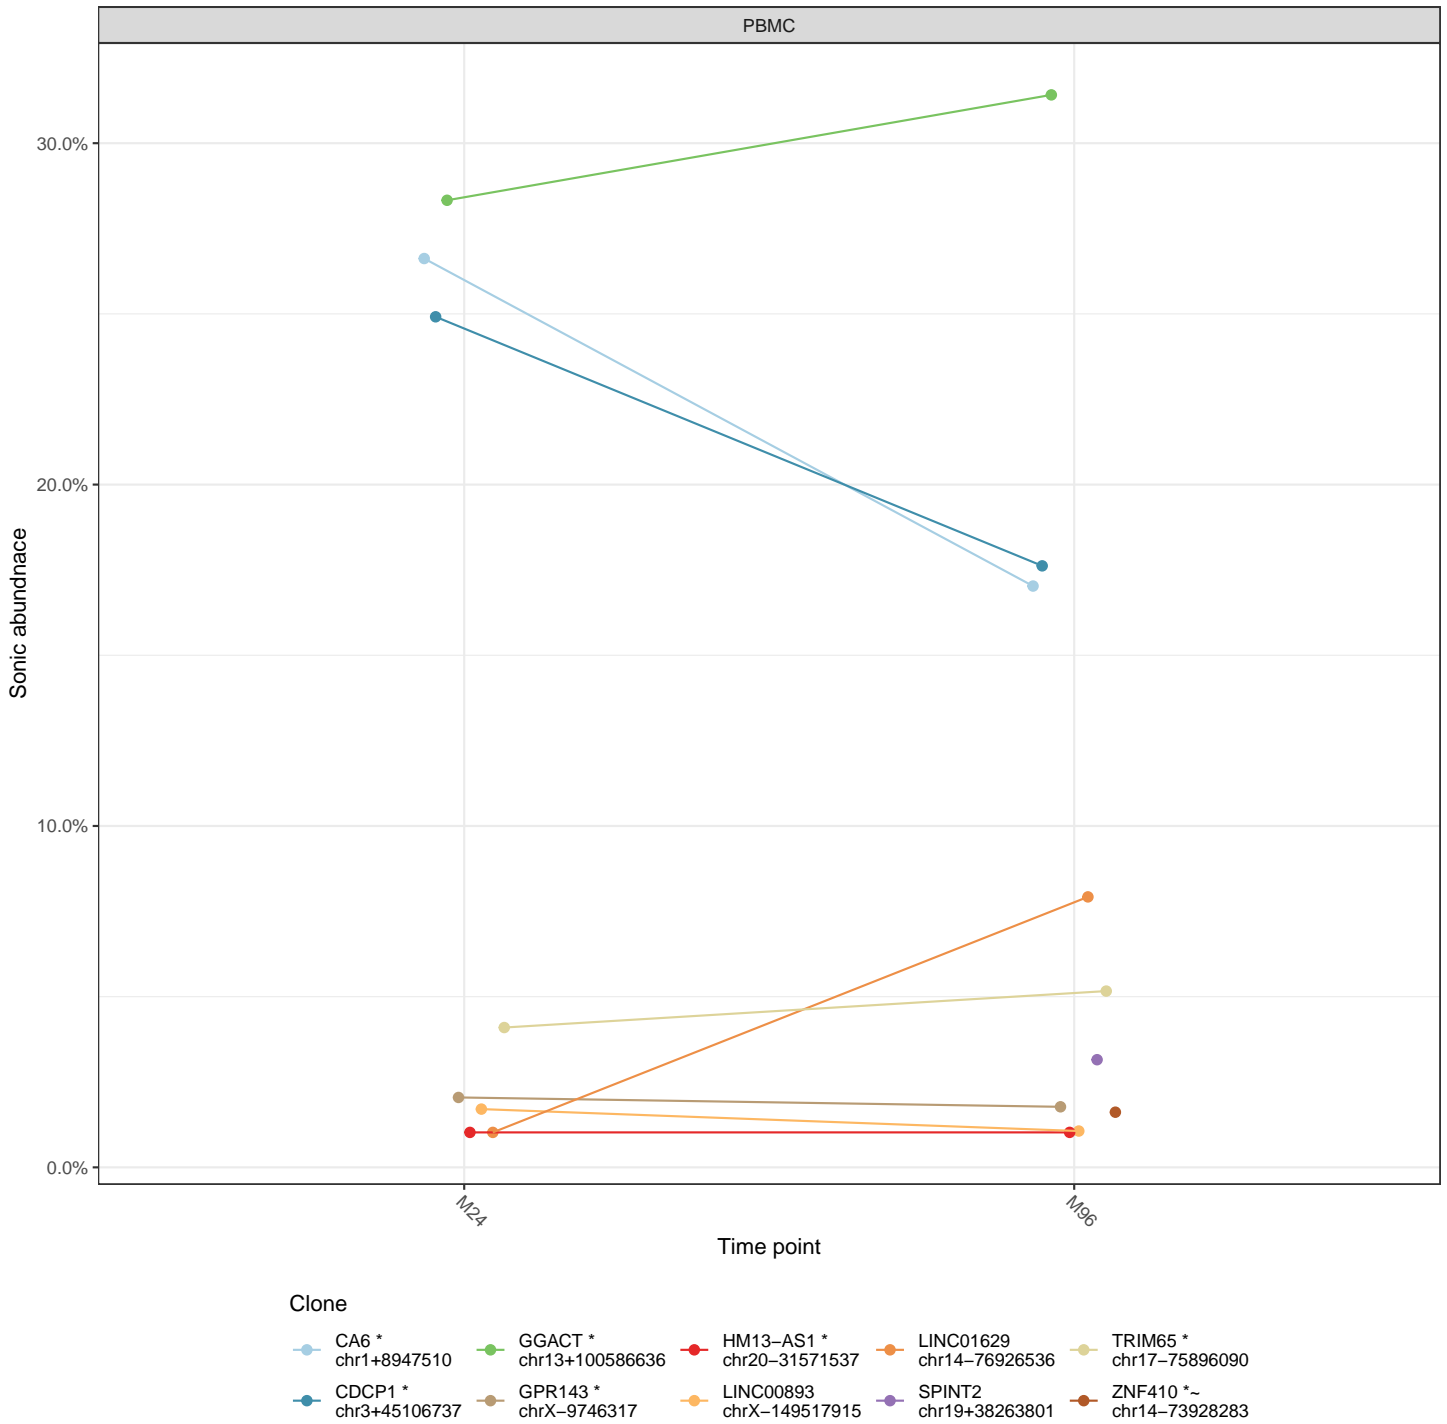

## Integration sites near particular genes of interest

Integration sites near genes that have been associated with adverse events are of particular interest. Below are longitudinal relative abundance plots that focus on the most abundant 5 clones whose nearest genes are LMO2, IKZF1, CCND2, HMGA2, and MECOM.

No integration sites were found near LMO2, IKZF1, CCND2, HMGA2 or MECOM

# Sample relative abundance heatmap

Alternatively, the relative abundances of the most abundant 10 clones from each cell sampled type can be visualized as a heat map.

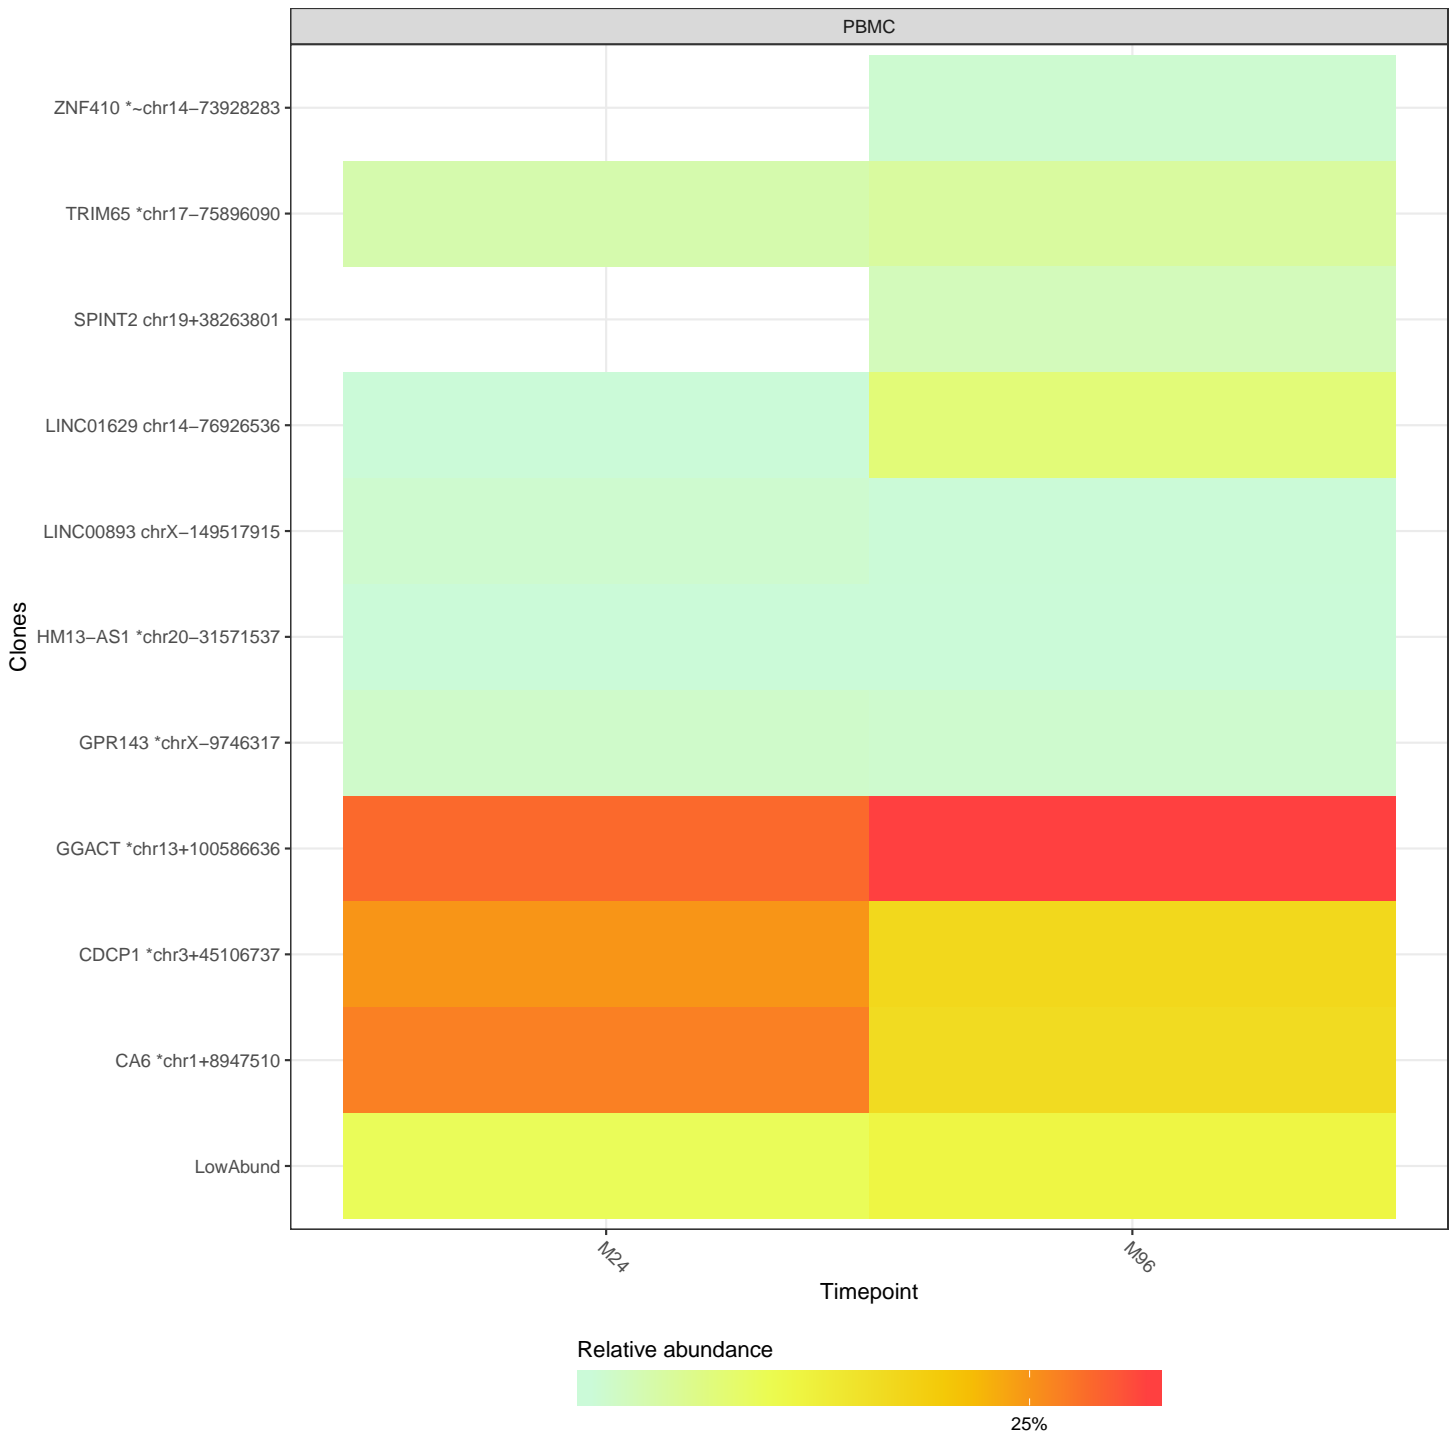

# What are the most frequently occurring gene types in the subject?

The word clouds below illustrate the nearest genes of the most abundant clones from each sample where the numeric ranges represent the upper and lower clonal abundances.

PBMC  
M24 1:83

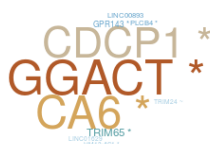

PBMC  
M96 1:797

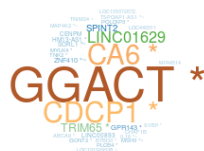

# Multihits

This analysis has been looking at integration sites that can be uniquely mapped. But it is also helpful to look at reads finding multiple equally good alignments in the genome which can be referred to as 'Multihits'. If an integration site occurred within a repeat element (i.e. Alus, LINE, SINE, etc), then it might be helpful to access those sites for potential detrimental effects. These collection of sequences are analyzed separately due to their ambiguity.

No sample contained a multihit grouping which exceeded 20% of the sample's inferred cells.

# Methods

All coordinates are on human genome draft hg38.

Detailed methods can be found these publications:

- Bioinformatics. 2012 Mar 15; 28(6): 755–762.
- Mol Ther Methods Clin Dev. 2017 Mar 17; 4: 17–26.
- Mol Ther Methods Clin Dev. 2017 Mar 17; 4: 39–49.

Analysis software:

- INSPIRED v1.1 (<http://github.com/BushmanLab/INSPIRED>)

Report generation software:

- subjectReport v0.1 (<http://github.com/everettJK/geneTherapySubjectReport>)

# Analysis of integration site distributions and relative clonal abundance for subject p408

*November 02, 2020*

## Contents

|                                                                                                    |           |
|----------------------------------------------------------------------------------------------------|-----------|
| <b>Summary</b>                                                                                     | <b>2</b>  |
| Is there a rich population of progenitor cells delivering mature cells to the periphery? . . . . . | 2         |
| Do any cell clones account for more than 20% of all clones? . . . . .                              | 2         |
| Are any cell clones increasing in proportion over time? . . . . .                                  | 3         |
| <b>Introduction</b>                                                                                | <b>4</b>  |
| <b>Sample Summary</b>                                                                              | <b>5</b>  |
| <b>Tracking of clonal abundances</b>                                                               | <b>6</b>  |
| Relative abundance of cell clones . . . . .                                                        | 6         |
| Longitudinal behavior of major clones . . . . .                                                    | 8         |
| Integration sites near particular genes of interest . . . . .                                      | 9         |
| Sample relative abundance heatmap . . . . .                                                        | 10        |
| <b>What are the most frequently occurring gene types in the subject?</b>                           | <b>11</b> |
| <b>Multihits</b>                                                                                   | <b>12</b> |
| <b>Methods</b>                                                                                     | <b>13</b> |

# Summary

Is there a rich population of progenitor cells delivering mature cells to the periphery?

To provide a simple measure, we ask whether there are  $\geq 1000$  descendants of independent progenitors (i.e. unique integration sites) in minimally fractionated cell specimens (Whole blood, T cells, B cells, NK cells, Neutrophils, Monocytes and PBMC). Cell specimens that pass these criteria are operationally designated Rich.

| Time point | PBMC | Rich |
|------------|------|------|
| M42        | 114  | No   |
| M84        | 373  | No   |

Do any cell clones account for more than 20% of all clones?

For some trials, a reporting criteria is whether any cell clones expand to account for greater than 20% of all clones. The table below highlights samples with relative abundances  $\geq 20\%$  considering only samples with 50 or more inferred cells.

**No clones exceed 20% in any samples.**



# Are any cell clones increasing in proportion over time?

The plot below details the longitudinal sample relative abundances of the most abundant 20 clones where only samples with 50 or more inferred cells are considered.

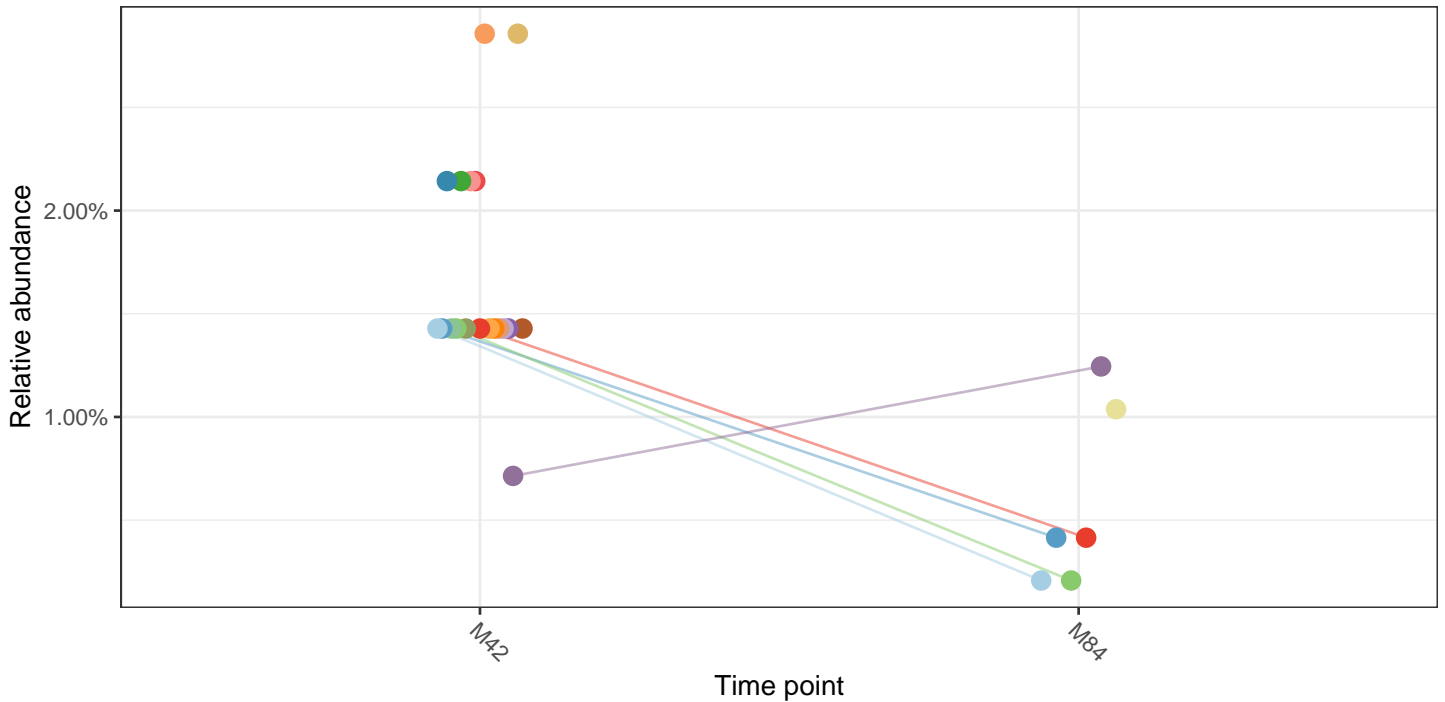

### Clone

- PBMC : ABHD2 \*~ chr15+89090726
- PBMC : ABHD2 \*~ chr15+89133212
- PBMC : CYP1B1-AS1 chr2-38107173
- PBMC : EOMES chr3-27666257
- PBMC : EPS8L2 \* chr11+726580
- PBMC : FER1L6,FER1L6-AS1 \* chr8-124007974
- PBMC : HSH2D \*~ chr19+16148391
- PBMC : IL1R2 chr2-102032722
- PBMC : LINC02068 \* chr3+172577454
- PBMC : LIX1L-AS1 \* chr1-145928118
- PBMC : LRRC8C \* chr1+89719152
- PBMC : MECOM \*~ chr3-169351631
- PBMC : MIR1-1HG chr20+62604504
- PBMC : MIR924HG \* chr18+39365373
- PBMC : PRDM16 \*~ chr1-3184351
- PBMC : PTK2B \* chr8+27377960
- PBMC : SMIM20 \* chr4-25914814
- PBMC : STON2 \* chr14-81417017
- PBMC : TTC34 chr1-2887842
- PBMC : ZSWIM2 chr2+186883495

### Data source

- Illumina

# Introduction

The attached report describes results of analysis of integration site distributions and relative abundance for samples from gene therapy trials. For cases of gene correction in circulating blood cells, it is possible to harvest cells sequentially from blood to monitor cell populations. Frequency of isolation information can provide information on the clonal structure of the population. This report summarizes results for subject p408 over time points M42, M84 in UCSC genome draft .

The samples studied in this report, the numbers of sequence reads, recovered integration vectors, and unique integration sites available for this subject are shown below. We quantify population clone diversity using Gini coefficients, Shannon index, and UC50. The Gini coefficient provides a measure of inequality in clonal abundance in each sample. The coefficient equals zero when all sites are equally abundant (polyclonal) and increases as fewer sites account for more of the total (oligoclonal). Shannon index is another widely used measure of diversity and it accounts for both abundance and evenness of the integration events. Alternatively, the UC50 is the number of unique clones which make up the top 50% of the sample's abundance. For polyclonal samples, one may expect a low Gini coefficient, high Shannon Index, and high UC50 (proportional to the total number of unique sites identified in the sample).

Under most circumstances only a subset of sites will be sampled. We thus include an estimate of sample size based on frequency of isolation information from the SonicLength method (Berry, 2012). The 'S.chao1' column denotes the estimated lower bound for population size derived using Chao estimate (Chao, 1987). If sample replicates were present then estimates were subjected to jackknife bias correction.

We estimate the numbers of cell clones sampled using the SonicLength method (Berry, 2012); this is summarized in the column "Inferred cells". Integration sites were recovered using ligation mediated PCR after random fragmentation of genomic DNA, which reduces recovery biases compared with restriction enzyme cleavage. Relative abundance was not measured from read counts, which are known to be inaccurate, but from marks introduced into DNA specimens prior to PCR amplification using the SonicLength method PMID:22238265.

We quantify population diversity using Gini coefficients, Shannon index, and UC50. The Gini coefficient provides a measure of inequality in clonal abundance in each sample. The coefficient equals zero when all sites are equally abundant (polyclonal) and increases as fewer sites account for more of the total (oligoclonal). Shannon index is another widely used measure of diversity and it accounts for both abundance and evenness of the integration events. UC50 is the number of clones which make up the top 50% of the sample's abundance. For polyclonal samples, one may expect a low Gini coefficient, high Shannon Index, and high UC50 (proportional to the total number of unique sites identified in the sample).

Integration positions are reported with the format (nearest gene, chromosome, +/-, genomic position) where the nearest gene is the nearest transcriptional boundary to the integration position, '+' refers to integration in the positive orientation and '-' refers to integration in the reverse orientation. Reported distances are signed where where the sign indicates if integrations are upstream (-) or downstream (+, no sign) of the nearest gene. Nearest genes possess additional annotations described in the table below.

| Symbol | Meaning                                             |
|--------|-----------------------------------------------------|
| *      | site is within a transcription unit                 |
| ~      | site is within 50kb of a cancer related gene        |
| !      | nearest gene was associated with lymphoma in humans |

# Sample Summary

The table below provides population statistics for each analyzed sample. Occasionally multiple samples from the same cell fraction and time point are analyzed where only the sample with greatest number of inferred cells is considered in this report. Sample rows with NA listed in the TotalReads, InferredCells, UniqueSite and other columns represent samples which were analyzed but no integration sites were identified.

| GTSP     | dataSource | Timepoint | CellType | TotalReads | InferredCells | UniqueSites | Gini  | Chao1 | Shannon | Pielou | UC50 | Included | runDate    | VCN  |
|----------|------------|-----------|----------|------------|---------------|-------------|-------|-------|---------|--------|------|----------|------------|------|
| GTSP3611 | Illumina   | M42       | PBMC     | 268,031    | 140           | 114         | 0.163 | 465   | 4.65    | 0.982  | 45   | yes      | 2020-10-14 | 1.24 |
| GTSP3612 | Illumina   | M84       | PBMC     | 254,608    | 482           | 373         | 0.191 | 1,113 | 5.82    | 0.982  | 133  | yes      | 2020-10-14 | 1.28 |

# Tracking of clonal abundances

## Relative abundance of cell clones

The relative abundances of cell clones is summarized in the stacked bar plots below. The cell fraction studied is named at the top of each plot and the time points are marked at the bottom. The different bars in each panel show the major cell clones, as marked by integration sites where the x-axis indicates time points and the y-axis is scaled by proportion of the total cells sampled. The top 10 most abundant clones from each cell type have been named by the nearest gene while the remaining sites are binned as low abundance (LowAbund; grey). The total number of genomic fragments used to identify integration sites are listed atop of each plot. These fragments are generated by restriction endonucleases in 454 sequencing experiments and by sonic shearing in Illumina sequencing experiments. Relative abundances are calculated using the total number of reads associated with clones in 454 sequencing experiments while the number of unique sonic breaks is used in Illumina sequencing experiments.

PBMC

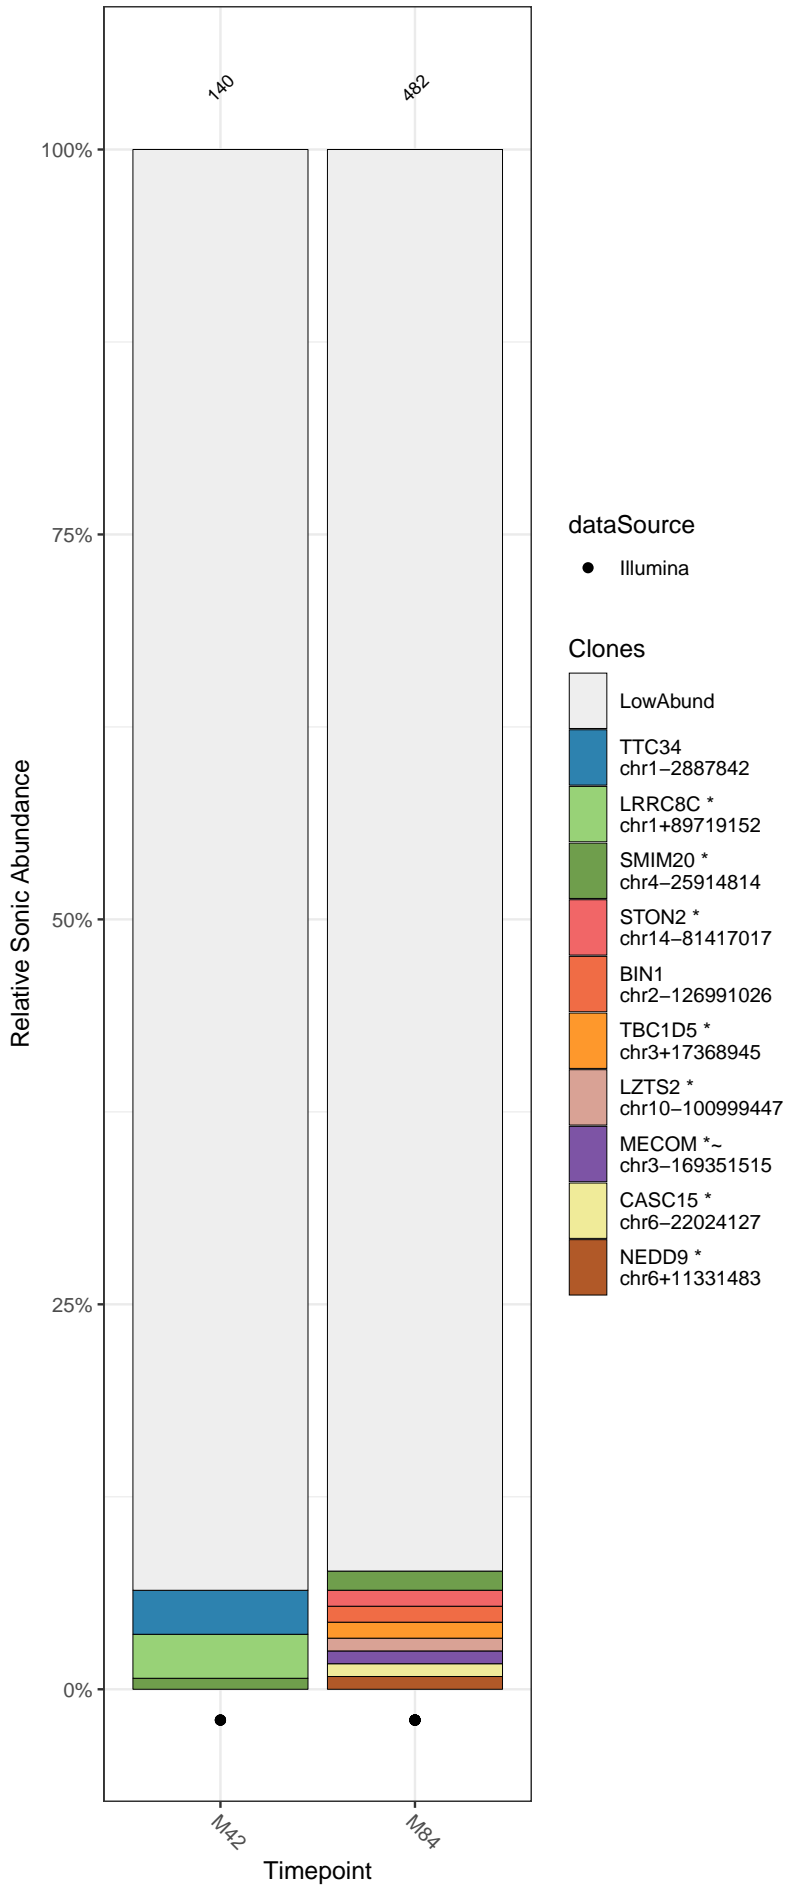

# Longitudinal behavior of major clones

When multiple time points are available, it is of interest to track the behavior of the most abundant clones across different cell types. A plot of the relative abundances of the most abundant 10 clones is shown below. For cases where only a single time point is available, the data is plotted as unlinked points.

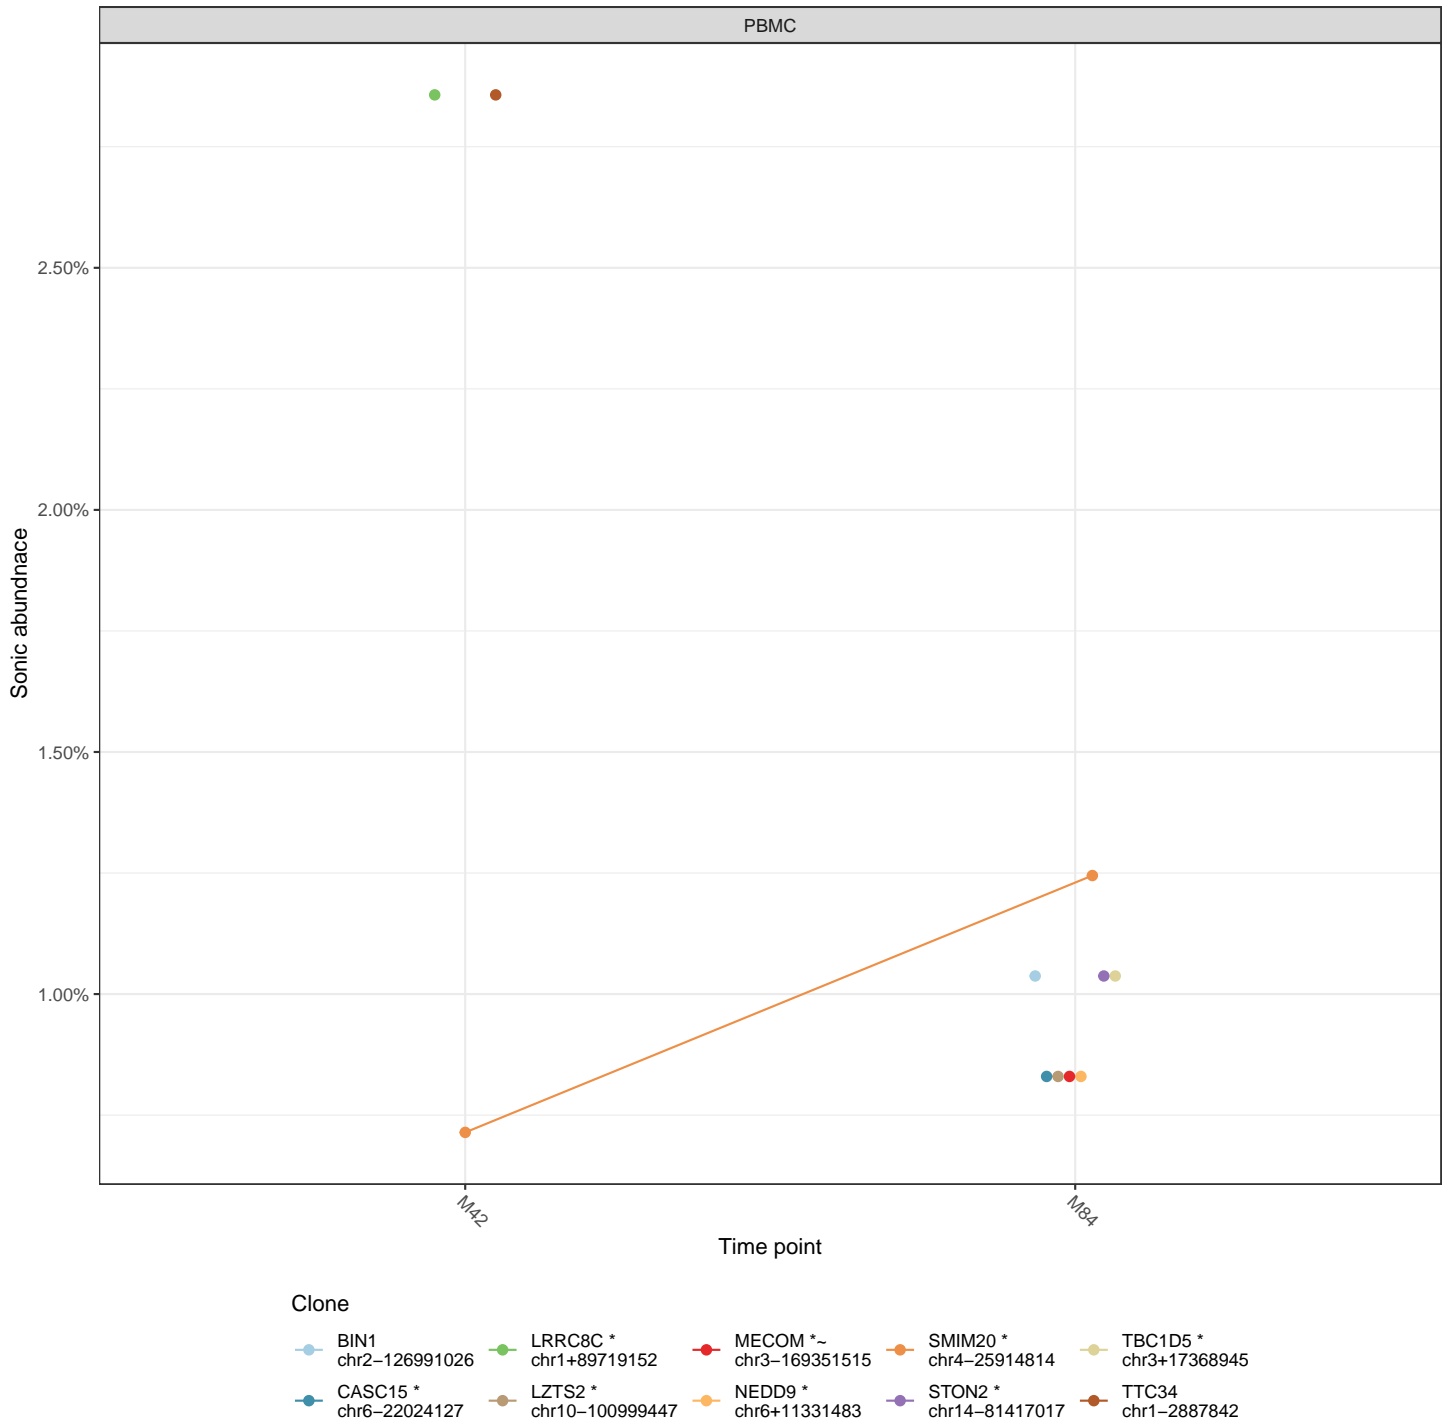

# Integration sites near particular genes of interest

Integration sites near genes that have been associated with adverse events are of particular interest. Below are longitudinal relative abundance plots that focus on the most abundant 5 clones whose nearest genes are LMO2, IKZF1, CCND2, HMGA2, and MECOM.

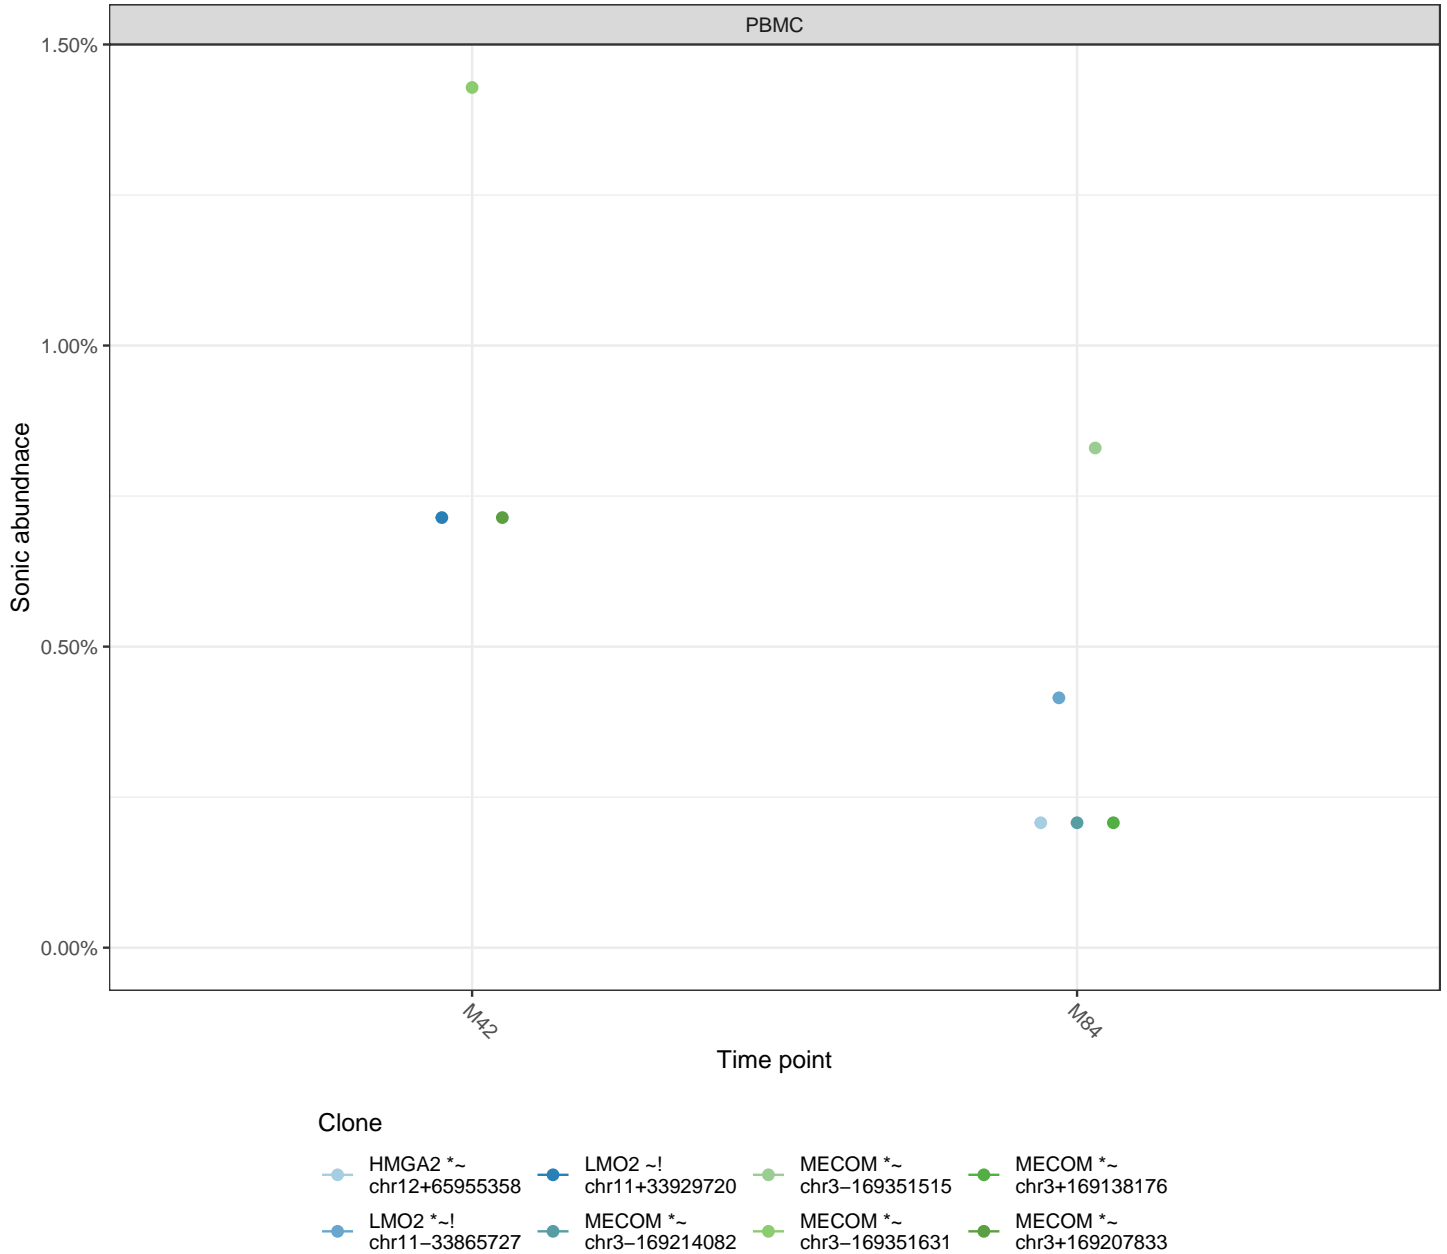

# Sample relative abundance heatmap

Alternatively, the relative abundances of the most abundant 10 clones from each cell sampled type can be visualized as a heat map.

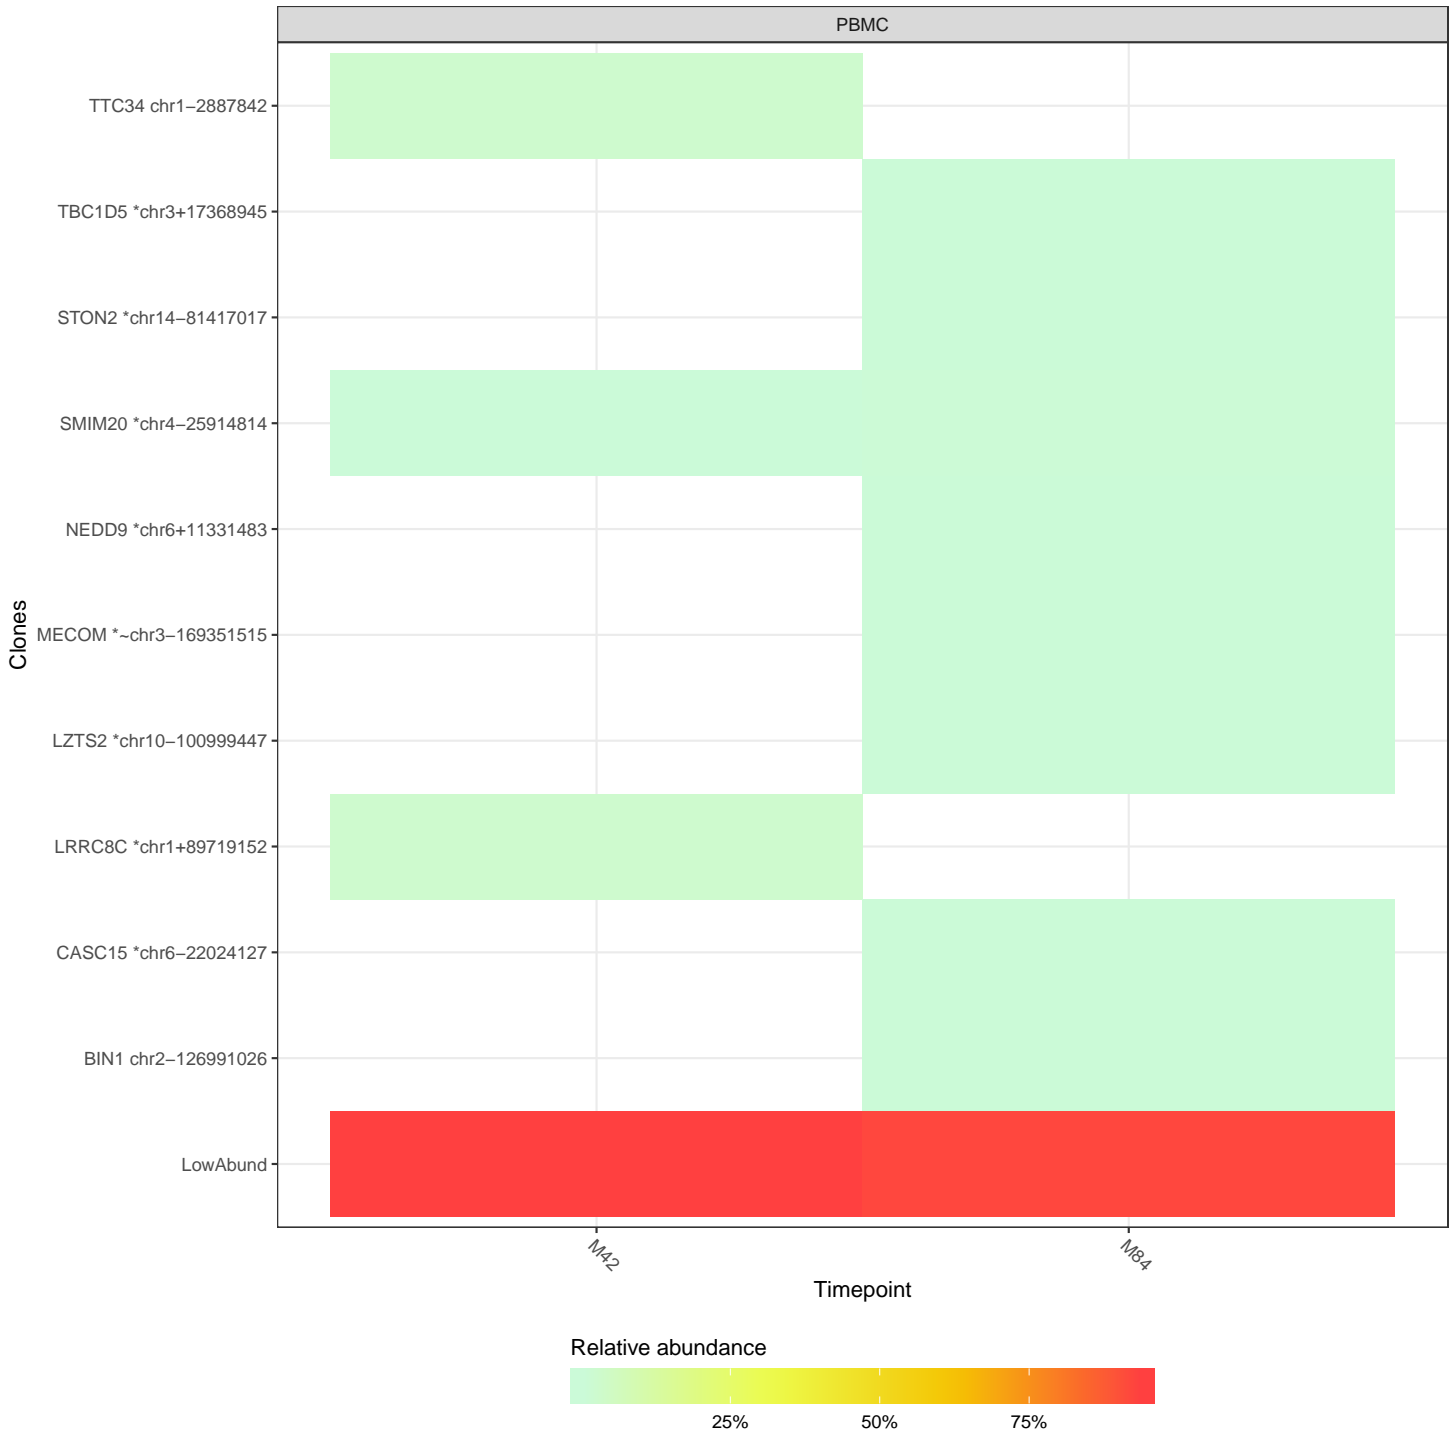



# What are the most frequently occurring gene types in the subject?

The word clouds below illustrate the nearest genes of the most abundant clones from each sample where the numeric ranges represent the upper and lower clonal abundances.

PBMC  
M42 1:4

PBMC  
M84 1:6

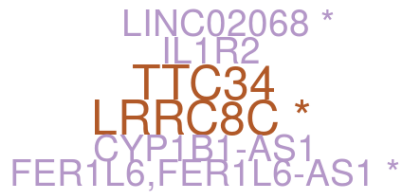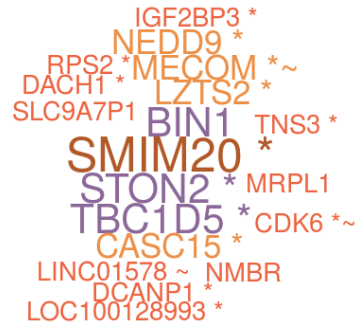

# Multihits

This analysis has been looking at integration sites that can be uniquely mapped. But it is also helpful to look at reads finding multiple equally good alignments in the genome which can be referred to as 'Multihits'. If an integration site occurred within a repeat element (i.e. Alus, LINE, SINE, etc), then it might be helpful to access those sites for potential detrimental effects. These collection of sequences are analyzed separately due to their ambiguity.

No sample contained a multihit grouping which exceeded 20% of the sample's inferred cells.

# Methods

All coordinates are on human genome draft hg38.

Detailed methods can be found these publications:

- Bioinformatics. 2012 Mar 15; 28(6): 755–762.
- Mol Ther Methods Clin Dev. 2017 Mar 17; 4: 17–26.
- Mol Ther Methods Clin Dev. 2017 Mar 17; 4: 39–49.

Analysis software:

- INSPIRED v1.1 (<http://github.com/BushmanLab/INSPIRED>)

Report generation software:

- subjectReport v0.1 (<http://github.com/everettJK/geneTherapySubjectReport>)

# Analysis of integration site distributions and relative clonal abundance for subject p409

*November 02, 2020*

## Contents

|                                                                                                    |           |
|----------------------------------------------------------------------------------------------------|-----------|
| <b>Summary</b>                                                                                     | <b>2</b>  |
| Is there a rich population of progenitor cells delivering mature cells to the periphery? . . . . . | 2         |
| Do any cell clones account for more than 20% of all clones? . . . . .                              | 2         |
| Are any cell clones increasing in proportion over time? . . . . .                                  | 3         |
| <b>Introduction</b>                                                                                | <b>4</b>  |
| <b>Sample Summary</b>                                                                              | <b>5</b>  |
| <b>Tracking of clonal abundances</b>                                                               | <b>6</b>  |
| Relative abundance of cell clones . . . . .                                                        | 6         |
| Longitudinal behavior of major clones . . . . .                                                    | 8         |
| Integration sites near particular genes of interest . . . . .                                      | 9         |
| Sample relative abundance heatmap . . . . .                                                        | 10        |
| <b>What are the most frequently occurring gene types in the subject?</b>                           | <b>11</b> |
| <b>Multihits</b>                                                                                   | <b>12</b> |
| <b>Methods</b>                                                                                     | <b>13</b> |

# Summary

Is there a rich population of progenitor cells delivering mature cells to the periphery?

To provide a simple measure, we ask whether there are  $\geq 1000$  descendants of independent progenitors (i.e. unique integration sites) in minimally fractionated cell specimens (Whole blood, T cells, B cells, NK cells, Neutrophils, Monocytes and PBMC). Cell specimens that pass these criteria are operationally designated Rich.

| Time point | PBMC | Rich |
|------------|------|------|
| M36        | 73   | No   |
| M84        | 247  | No   |

Do any cell clones account for more than 20% of all clones?

For some trials, a reporting criteria is whether any cell clones expand to account for greater than 20% of all clones. The table below highlights samples with relative abundances  $\geq 20\%$  considering only samples with 50 or more inferred cells.

**No clones exceed 20% in any samples.**

# Are any cell clones increasing in proportion over time?

The plot below details the longitudinal sample relative abundances of the most abundant 20 clones where only samples with 50 or more inferred cells are considered.

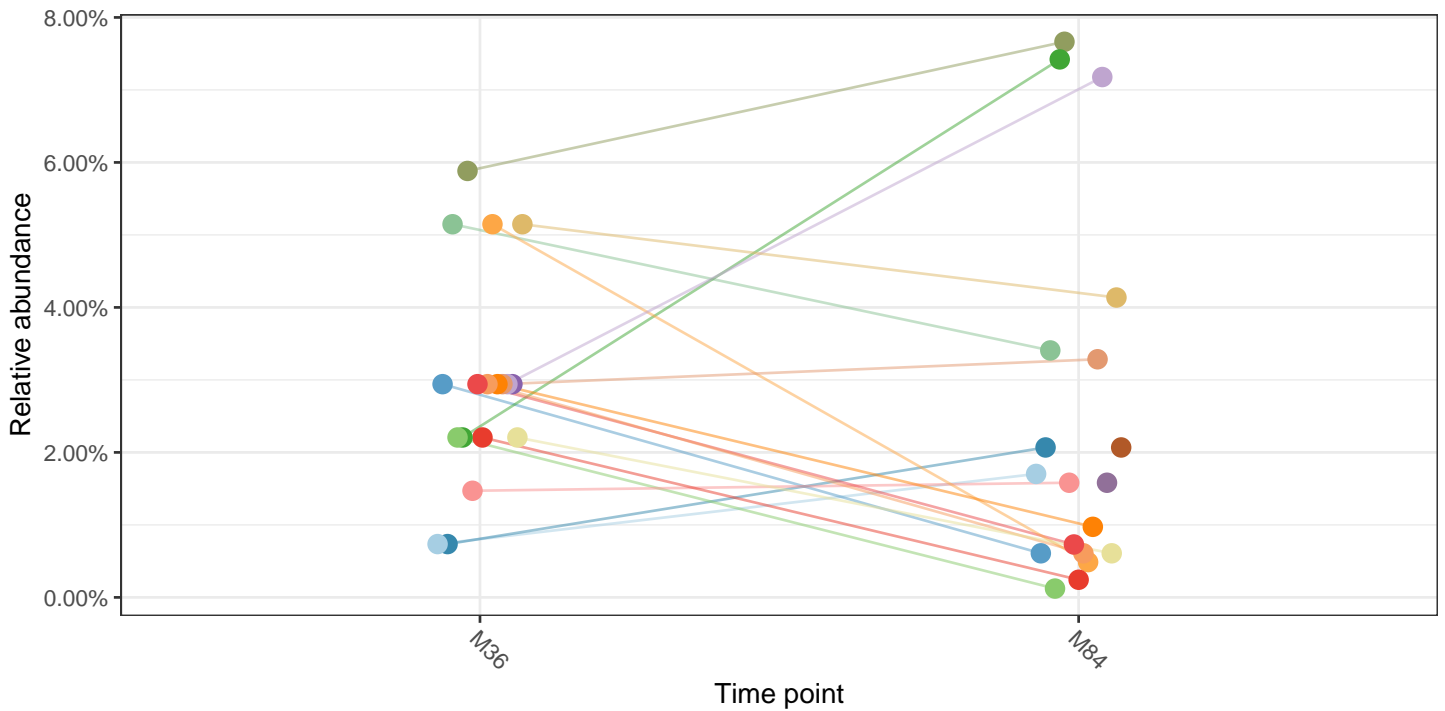

### Clone

- PBMC : AMZ2P1 \*  
chr17+64974721
- PBMC : ANKFN1 \*  
chr17+56297630
- PBMC : ANO10 \*  
chr3+43394760
- PBMC : BCL7C, MIR762HG \*  
chr16-30875702
- PBMC : CHIC2 ~  
chr4+54065034
- PBMC : FGF6 ~  
chr12+4414341
- PBMC : HCK \*~  
chr20+32061477
- PBMC : ITGB2 \*~  
chr21-44920486
- PBMC : LRRC23 ~  
chr12+6903597
- PBMC : MALRD1 \*  
chr10+19640078
- PBMC : MBTD1 \*  
chr17-51238091
- PBMC : MIR4432HG  
chr2+60305053
- PBMC : MSI2 \*~  
chr17+57294971
- PBMC : NLN \*  
chr5+65825764
- PBMC : PPP2R2A \*  
chr8+26293328
- PBMC : RIMKLB \*  
chr12-8692489
- PBMC : RPAP2 \*~  
chr1+92344911
- PBMC : SLC25A5  
chrX-119503005
- PBMC : TMEM230  
chr20+5056539
- PBMC : ZDHHC15  
chrX-75547707

### Data source

- Illumina

# Introduction

The attached report describes results of analysis of integration site distributions and relative abundance for samples from gene therapy trials. For cases of gene correction in circulating blood cells, it is possible to harvest cells sequentially from blood to monitor cell populations. Frequency of isolation information can provide information on the clonal structure of the population. This report summarizes results for subject p409 over time points M36, M84 in UCSC genome draft .

The samples studied in this report, the numbers of sequence reads, recovered integration vectors, and unique integration sites available for this subject are shown below. We quantify population clone diversity using Gini coefficients, Shannon index, and UC50. The Gini coefficient provides a measure of inequality in clonal abundance in each sample. The coefficient equals zero when all sites are equally abundant (polyclonal) and increases as fewer sites account for more of the total (oligoclonal). Shannon index is another widely used measure of diversity and it accounts for both abundance and evenness of the integration events. Alternatively, the UC50 is the number of unique clones which make up the top 50% of the sample's abundance. For polyclonal samples, one may expect a low Gini coefficient, high Shannon Index, and high UC50 (proportional to the total number of unique sites identified in the sample).

Under most circumstances only a subset of sites will be sampled. We thus include an estimate of sample size based on frequency of isolation information from the SonicLength method (Berry, 2012). The 'S.chao1' column denotes the estimated lower bound for population size derived using Chao estimate (Chao, 1987). If sample replicates were present then estimates were subjected to jackknife bias correction.

We estimate the numbers of cell clones sampled using the SonicLength method (Berry, 2012); this is summarized in the column "Inferred cells". Integration sites were recovered using ligation mediated PCR after random fragmentation of genomic DNA, which reduces recovery biases compared with restriction enzyme cleavage. Relative abundance was not measured from read counts, which are known to be inaccurate, but from marks introduced into DNA specimens prior to PCR amplification using the SonicLength method PMID:22238265.

We quantify population diversity using Gini coefficients, Shannon index, and UC50. The Gini coefficient provides a measure of inequality in clonal abundance in each sample. The coefficient equals zero when all sites are equally abundant (polyclonal) and increases as fewer sites account for more of the total (oligoclonal). Shannon index is another widely used measure of diversity and it accounts for both abundance and evenness of the integration events. UC50 is the number of clones which make up the top 50% of the sample's abundance. For polyclonal samples, one may expect a low Gini coefficient, high Shannon Index, and high UC50 (proportional to the total number of unique sites identified in the sample).

Integration positions are reported with the format (nearest gene, chromosome, +/-, genomic position) where the nearest gene is the nearest transcriptional boundary to the integration position, '+' refers to integration in the positive orientation and '-' refers to integration in the reverse orientation. Reported distances are signed where the sign indicates if integrations are upstream (-) or downstream (+, no sign) of the nearest gene. Nearest genes possess additional annotations described in the table below.

| Symbol | Meaning                                             |
|--------|-----------------------------------------------------|
| *      | site is within a transcription unit                 |
| ~      | site is within 50kb of a cancer related gene        |
| !      | nearest gene was associated with lymphoma in humans |

# Sample Summary

The table below provides population statistics for each analyzed sample. Occasionally multiple samples from the same cell fraction and time point are analyzed where only the sample with greatest number of inferred cells is considered in this report. Sample rows with NA listed in the TotalReads, InferredCells, UniqueSite and other columns represent samples which were analyzed but no integration sites were identified.

| GTSP     | dataSource | Timepoint | CellType | TotalReads | InferredCells | UniqueSites | Gini  | Chao1 | Shannon | Pielou | UC50 | Included | runDate    | VCN   |
|----------|------------|-----------|----------|------------|---------------|-------------|-------|-------|---------|--------|------|----------|------------|-------|
| GTSP3613 | Illumina   | M36       | PBMC     | 207,626    | 136           | 73          | 0.365 | 191   | 4.02    | 0.936  | 15   | yes      | 2020-10-14 | 0.287 |
| GTSP3614 | Illumina   | M84       | PBMC     | 241,890    | 822           | 247         | 0.605 | 701   | 4.59    | 0.832  | 18   | yes      | 2020-10-14 | 0.627 |



# Tracking of clonal abundances

## Relative abundance of cell clones

The relative abundances of cell clones is summarized in the stacked bar plots below. The cell fraction studied is named at the top of each plot and the time points are marked at the bottom. The different bars in each panel show the major cell clones, as marked by integration sites where the x-axis indicates time points and the y-axis is scaled by proportion of the total cells sampled. The top 10 most abundant clones from each cell type have been named by the nearest gene while the remaining sites are binned as low abundance (LowAbund; grey). The total number of genomic fragments used to identify integration sites are listed atop of each plot. These fragments are generated by restriction endonucleases in 454 sequencing experiments and by sonic shearing in Illumina sequencing experiments. Relative abundances are calculated using the total number of reads associated with clones in 454 sequencing experiments while the number of unique sonic breaks is used in Illumina sequencing experiments.

PBMC

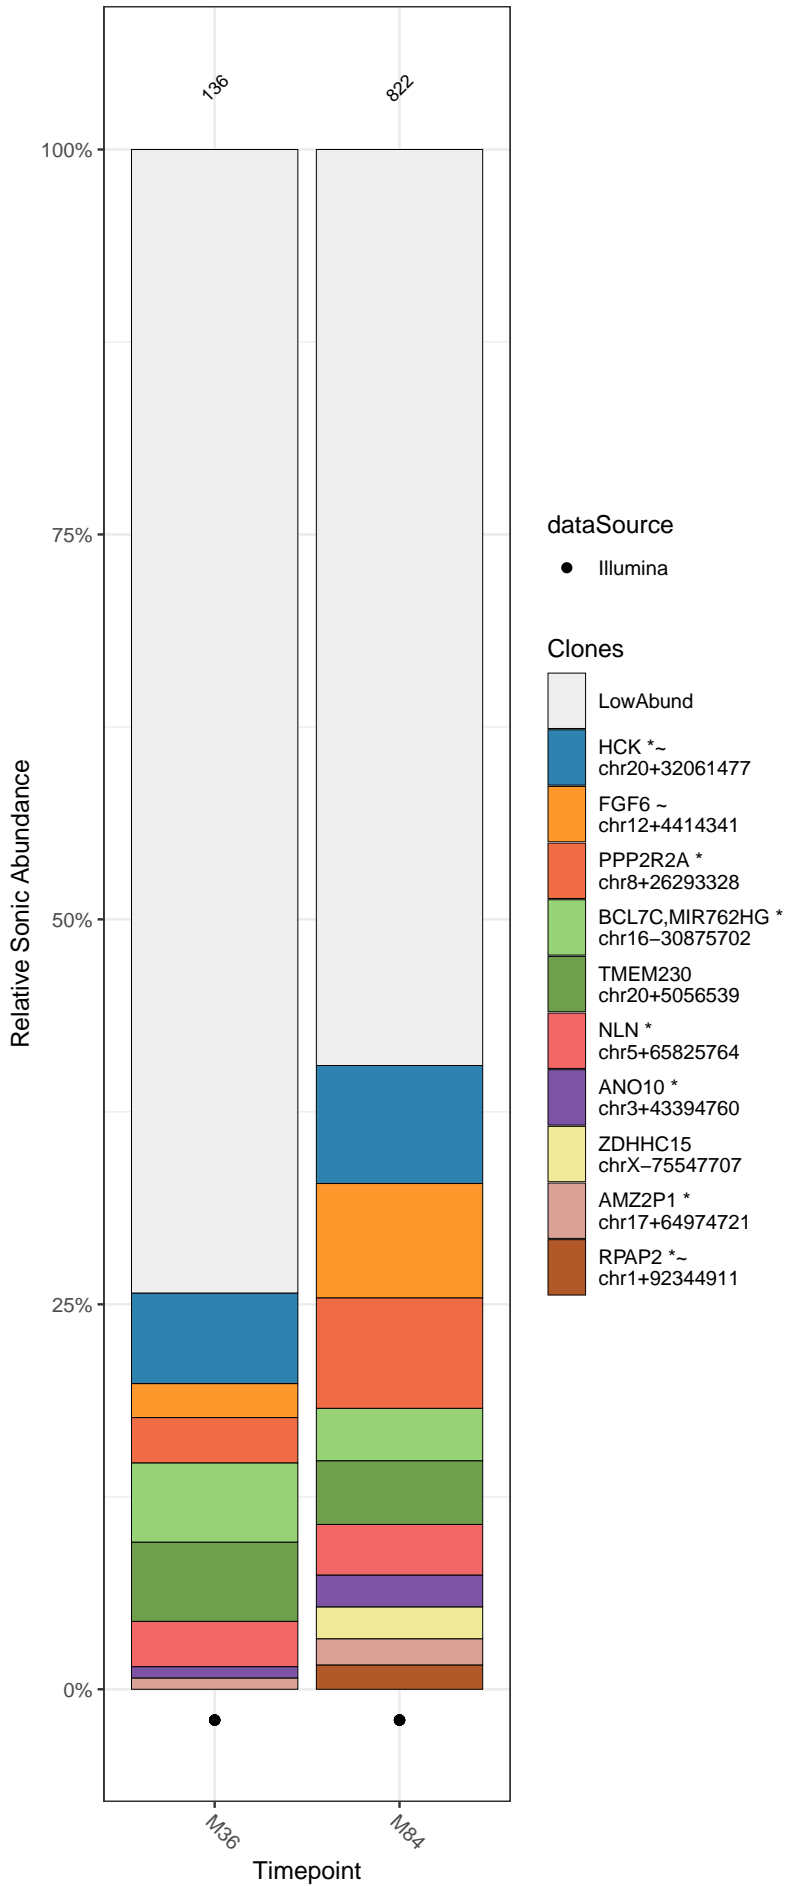

# Longitudinal behavior of major clones

When multiple time points are available, it is of interest to track the behavior of the most abundant clones across different cell types. A plot of the relative abundances of the most abundant 10 clones is shown below. For cases where only a single time point is available, the data is plotted as unlinked points.

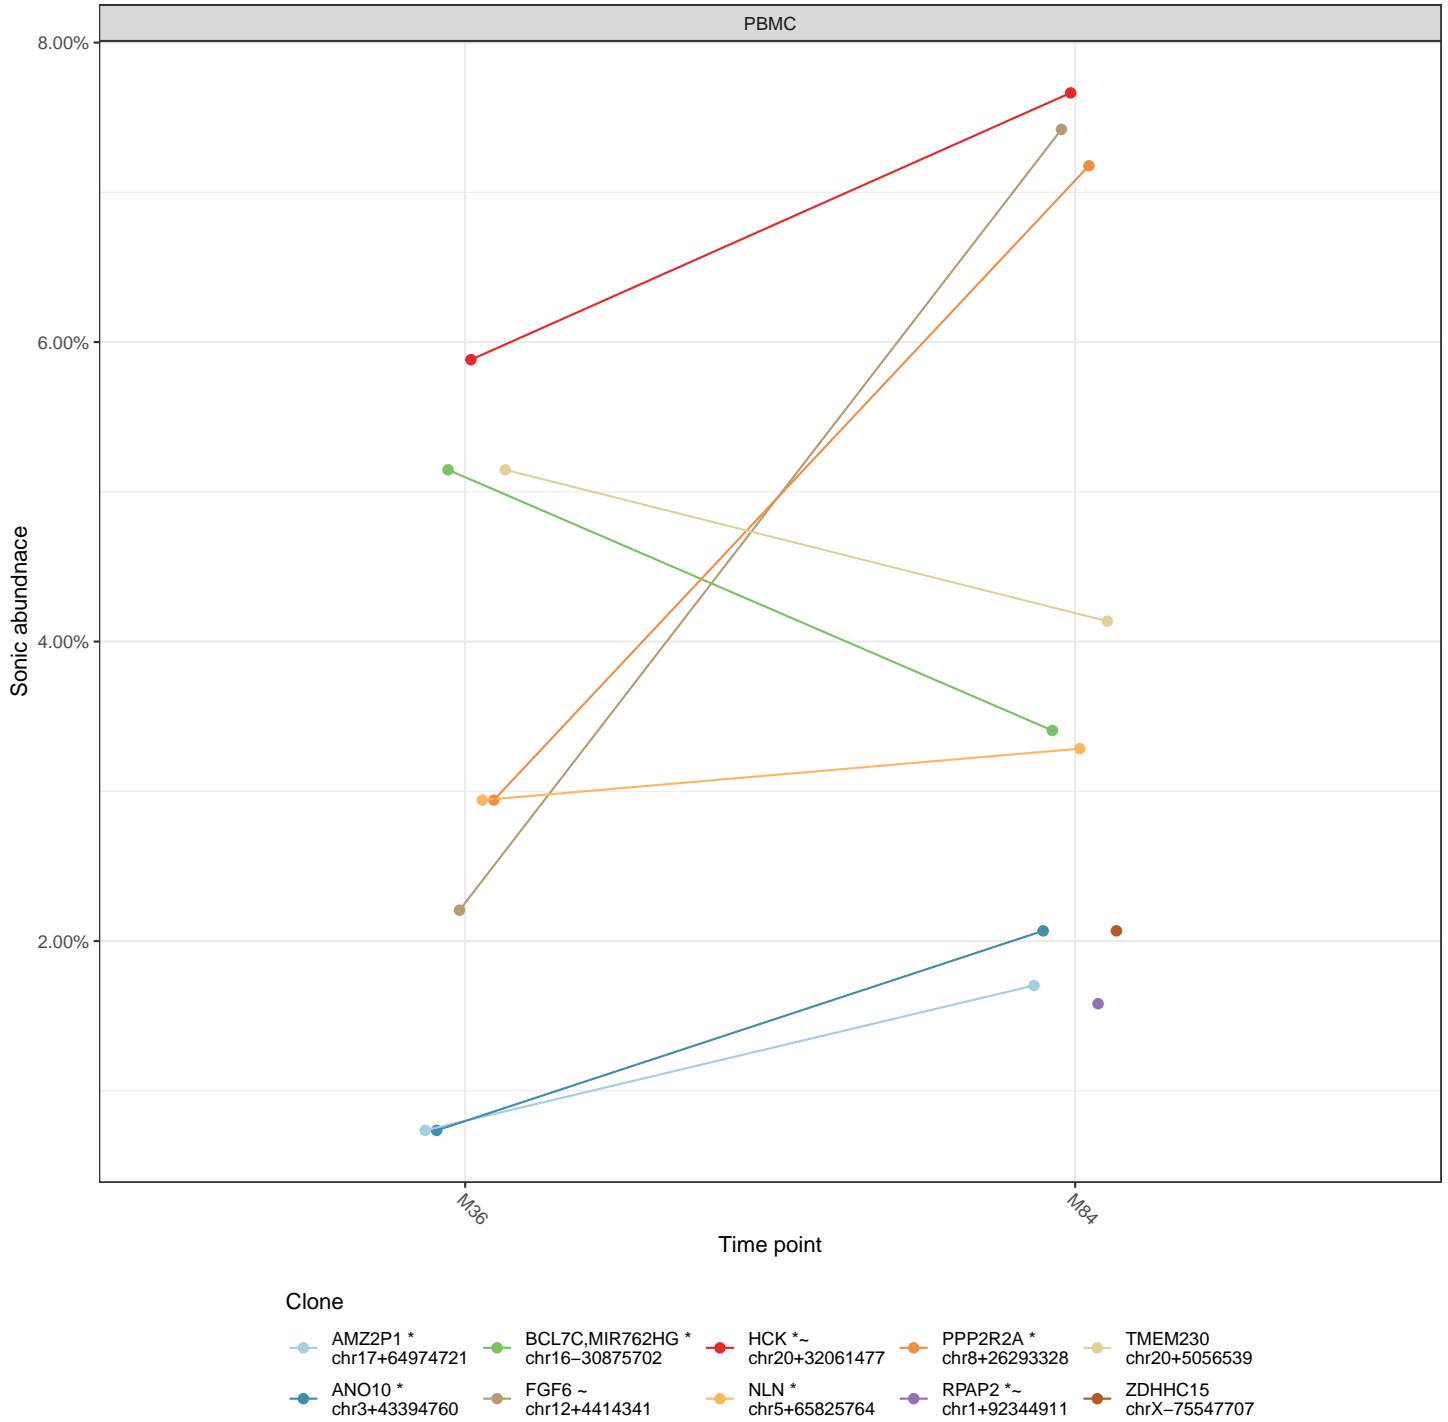

# Integration sites near particular genes of interest

Integration sites near genes that have been associated with adverse events are of particular interest. Below are longitudinal relative abundance plots that focus on the most abundant 5 clones whose nearest genes are LMO2, IKZF1, CCND2, HMGA2, and MECOM.

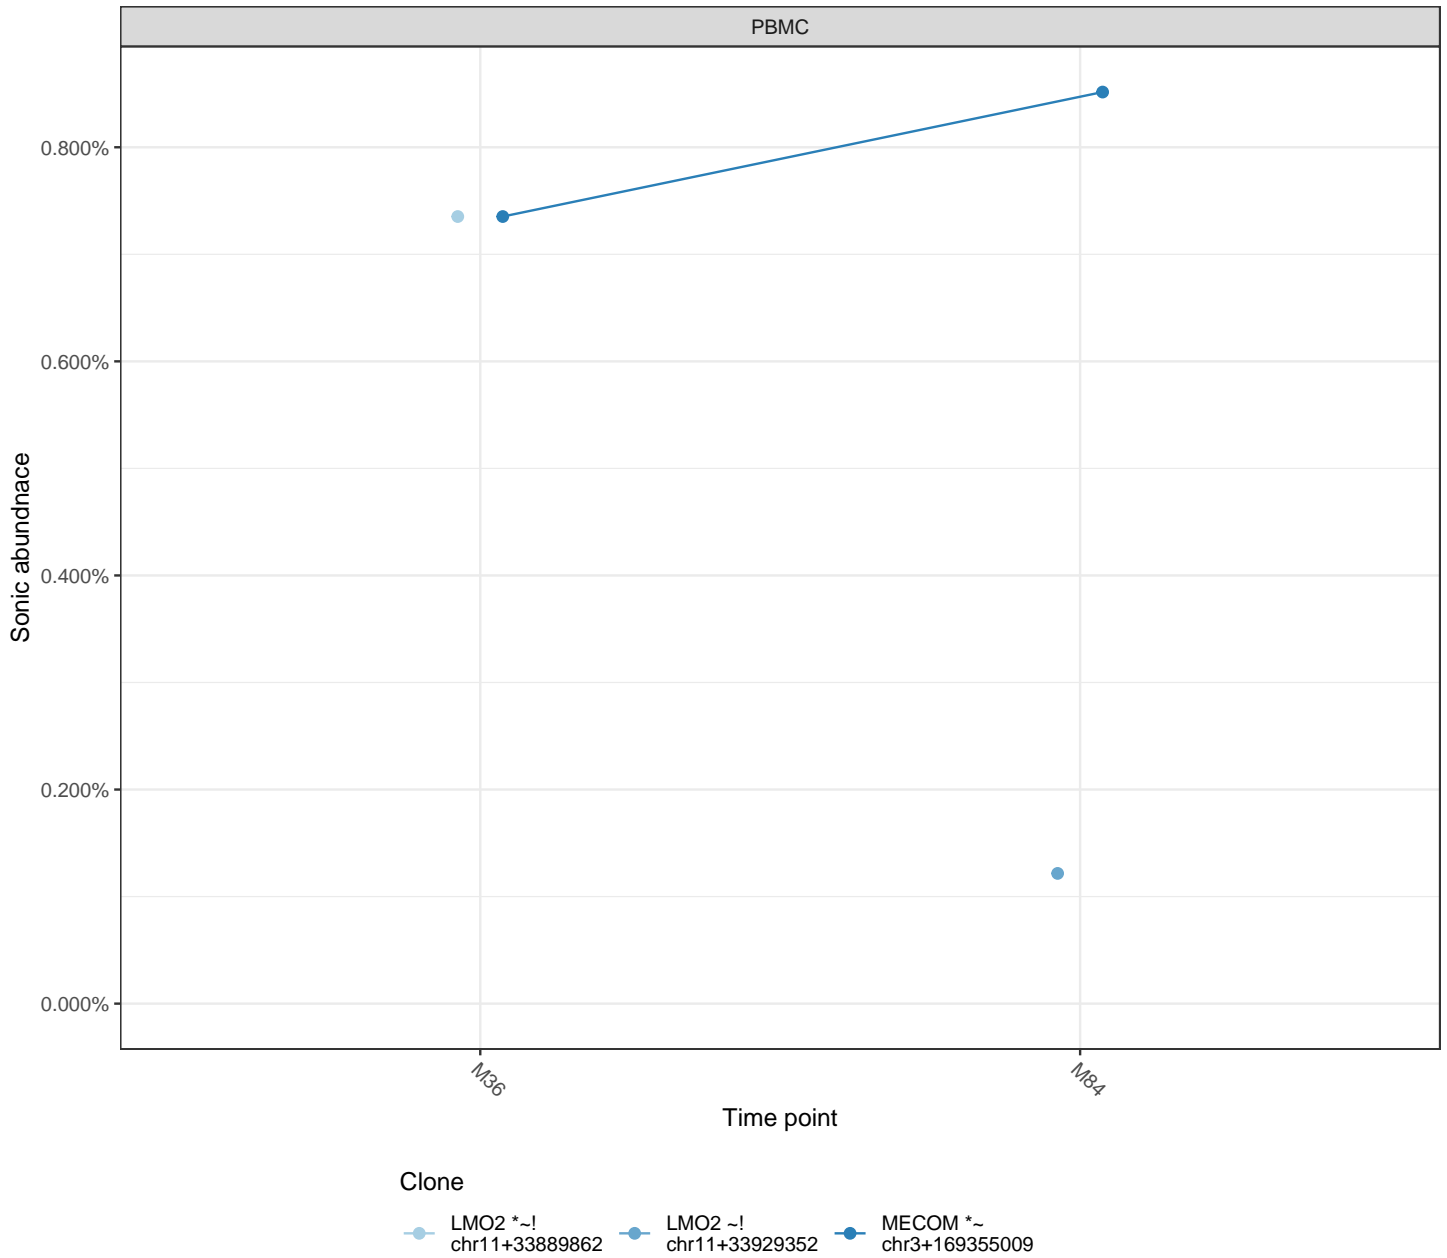

# Sample relative abundance heatmap

Alternatively, the relative abundances of the most abundant 10 clones from each cell sampled type can be visualized as a heat map.

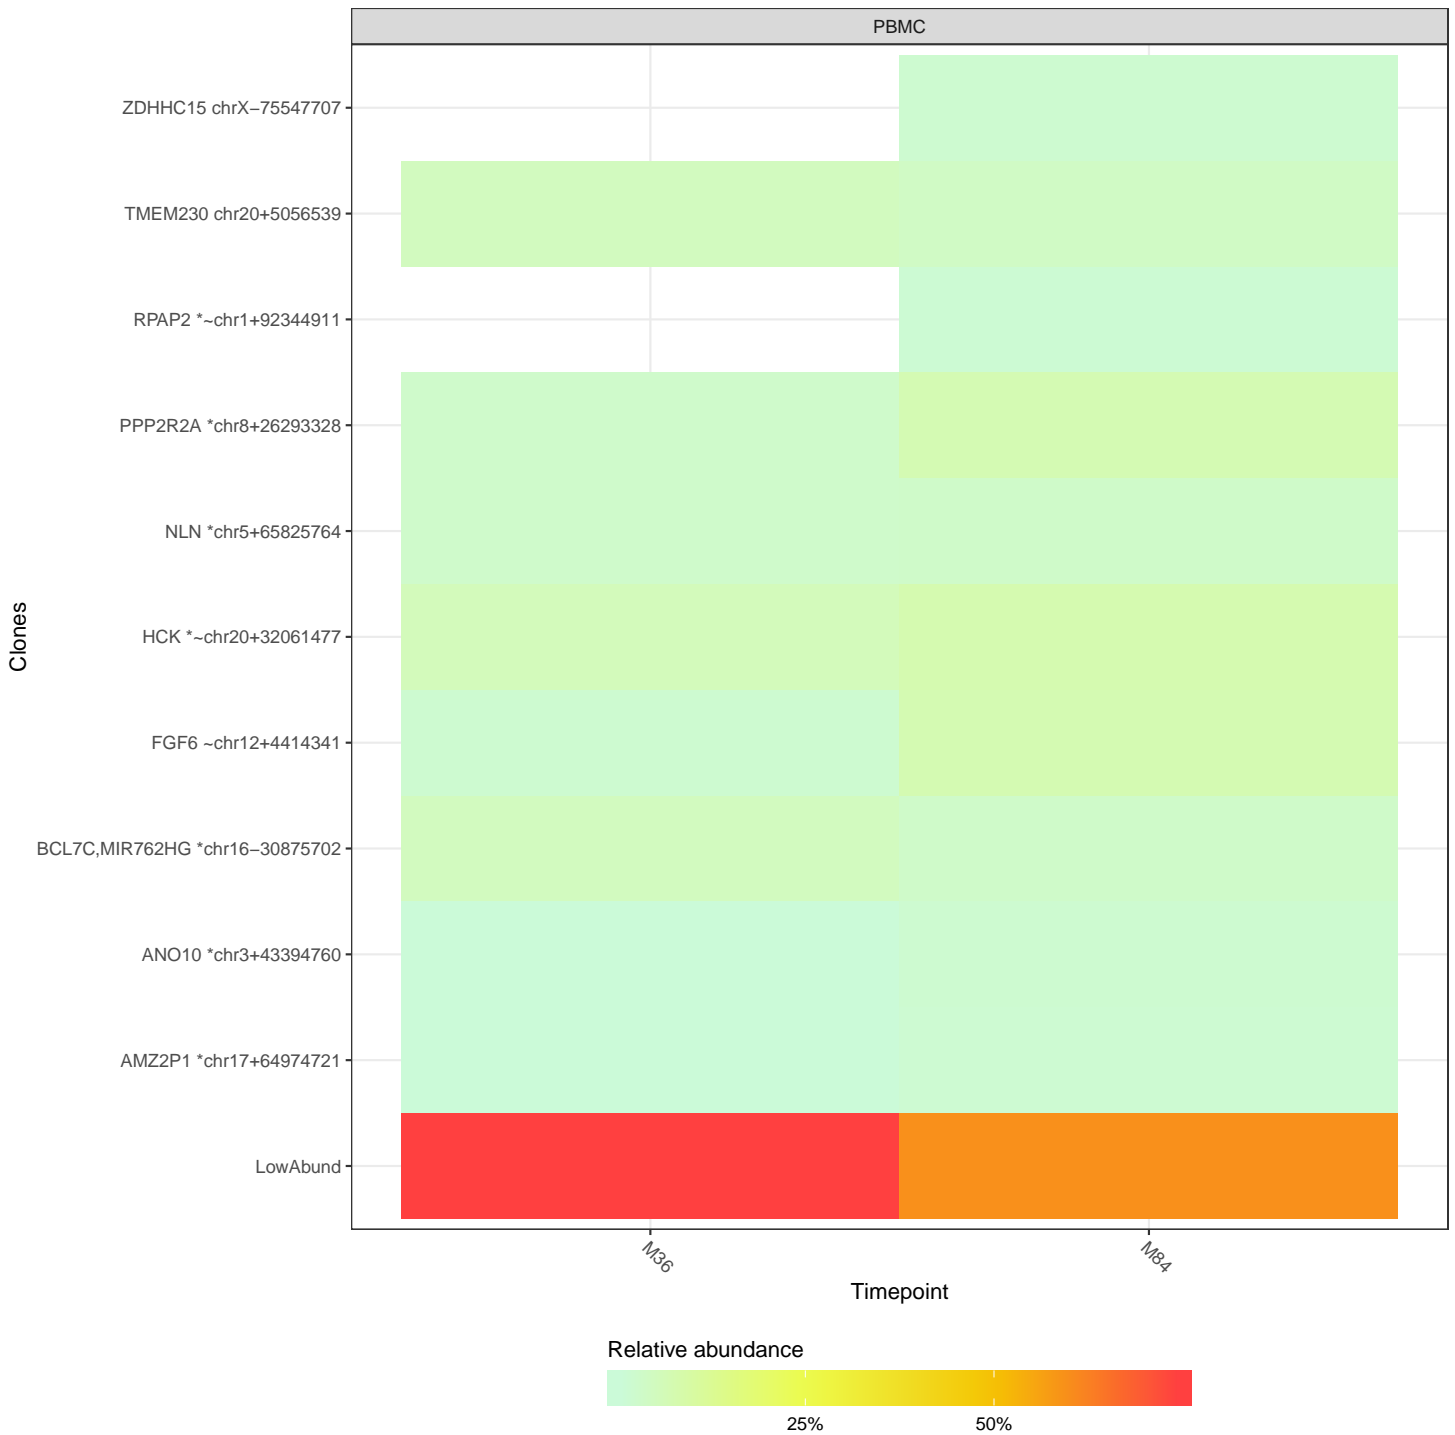

# What are the most frequently occurring gene types in the subject?

The word clouds below illustrate the nearest genes of the most abundant clones from each sample where the numeric ranges represent the upper and lower clonal abundances.

PBMC  
M36 1:8

PBMC  
M84 1:63

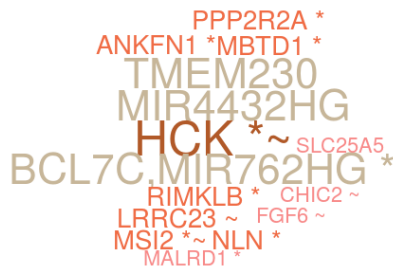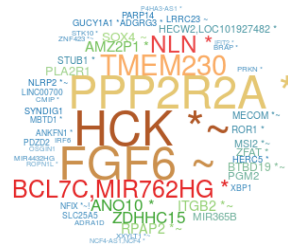

# Multihits

This analysis has been looking at integration sites that can be uniquely mapped. But it is also helpful to look at reads finding multiple equally good alignments in the genome which can be referred to as 'Multihits'. If an integration site occurred within a repeat element (i.e. Alus, LINE, SINE, etc), then it might be helpful to access those sites for potential detrimental effects. These collection of sequences are analyzed separately due to their ambiguity.

No sample contained a multihit grouping which exceeded 20% of the sample's inferred cells.

# Methods

All coordinates are on human genome draft hg38.

Detailed methods can be found these publications:

- Bioinformatics. 2012 Mar 15; 28(6): 755–762.
- Mol Ther Methods Clin Dev. 2017 Mar 17; 4: 17–26.
- Mol Ther Methods Clin Dev. 2017 Mar 17; 4: 39–49.

Analysis software:

- INSPIRED v1.1 (<http://github.com/BushmanLab/INSPIRED>)

Report generation software:

- subjectReport v0.1 (<http://github.com/everettJK/geneTherapySubjectReport>)



# Analysis of integration site distributions and relative clonal abundance for subject p410

*November 02, 2020*

## Contents

|                                                                                                    |           |
|----------------------------------------------------------------------------------------------------|-----------|
| <b>Summary</b>                                                                                     | <b>2</b>  |
| Is there a rich population of progenitor cells delivering mature cells to the periphery? . . . . . | 2         |
| Do any cell clones account for more than 20% of all clones? . . . . .                              | 2         |
| Are any cell clones increasing in proportion over time? . . . . .                                  | 3         |
| <b>Introduction</b>                                                                                | <b>4</b>  |
| <b>Sample Summary</b>                                                                              | <b>5</b>  |
| <b>Tracking of clonal abundances</b>                                                               | <b>6</b>  |
| Relative abundance of cell clones . . . . .                                                        | 6         |
| Longitudinal behavior of major clones . . . . .                                                    | 8         |
| Integration sites near particular genes of interest . . . . .                                      | 9         |
| Sample relative abundance heatmap . . . . .                                                        | 10        |
| <b>What are the most frequently occurring gene types in the subject?</b>                           | <b>11</b> |
| <b>Multihits</b>                                                                                   | <b>12</b> |
| <b>Methods</b>                                                                                     | <b>13</b> |

# Summary

Is there a rich population of progenitor cells delivering mature cells to the periphery?

To provide a simple measure, we ask whether there are  $\geq 1000$  descendants of independent progenitors (i.e. unique integration sites) in minimally fractionated cell specimens (Whole blood, T cells, B cells, NK cells, Neutrophils, Monocytes and PBMC). Cell specimens that pass these criteria are operationally designated Rich.

| Time point | PBMC | Rich |
|------------|------|------|
| M24        | 342  | No   |
| M72        | 442  | No   |

Do any cell clones account for more than 20% of all clones?

For some trials, a reporting criteria is whether any cell clones expand to account for greater than 20% of all clones. The table below highlights samples with relative abundances  $\geq 20\%$  considering only samples with 50 or more inferred cells.

**No clones exceed 20% in any samples.**

# Are any cell clones increasing in proportion over time?

The plot below details the longitudinal sample relative abundances of the most abundant 20 clones where only samples with 50 or more inferred cells are considered.

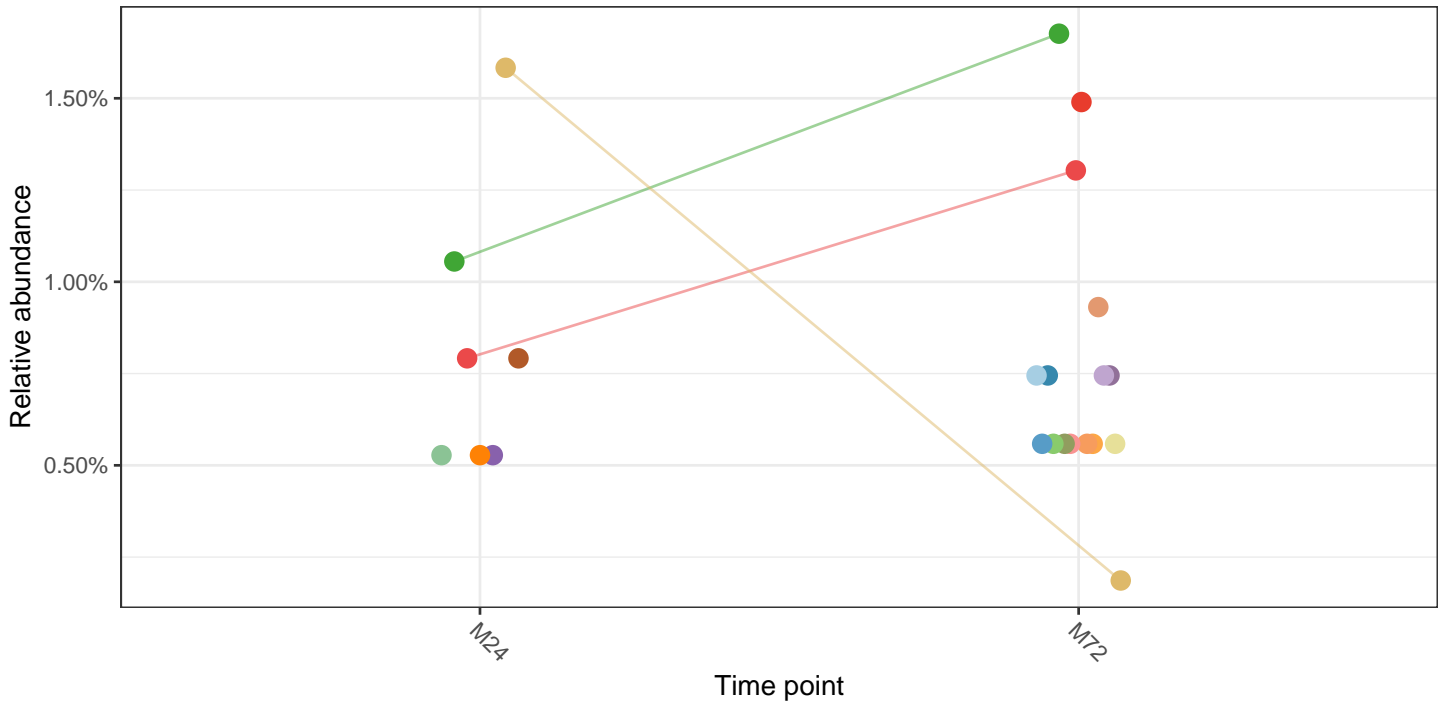

### Clone

- PBMC : FLJ42969 chr8-101109000
- PBMC : FOXO1 \*~ chr13-40559137
- PBMC : HMGA2 \*~ chr12+65926491
- PBMC : INPP5B \* chr1+37923728
- PBMC : KCNJ15 \* chr21+38257982
- PBMC : LAIR1 \* chr19-54365270
- PBMC : LDLRAD4 \* chr18-13562500
- PBMC : LINC00158 chr21-25487988
- PBMC : LINC01775 \* chr19+2461627
- PBMC : LOC442497 chr7-362022
- PBMC : MECOM \*~ chr3-169347551
- PBMC : MECOM \*~ chr3+169356581
- PBMC : PDIK1L chr1+26128071
- PBMC : PYGO1 chr15-55527849
- PBMC : RASGRP3 \* chr2+33499880
- PBMC : SMAP2 \* chr1-40388601
- PBMC : ZC3HAV1 \* chr7+139103089
- PBMC : ZMAT4 \* chr8-40745567
- PBMC : ZMAT4 \* chr8+40746252
- PBMC : ZNF710 chr15+90000943

### Data source

- Illumina

# Introduction

The attached report describes results of analysis of integration site distributions and relative abundance for samples from gene therapy trials. For cases of gene correction in circulating blood cells, it is possible to harvest cells sequentially from blood to monitor cell populations. Frequency of isolation information can provide information on the clonal structure of the population. This report summarizes results for subject p410 over time points M24, M72 in UCSC genome draft .

The samples studied in this report, the numbers of sequence reads, recovered integration vectors, and unique integration sites available for this subject are shown below. We quantify population clone diversity using Gini coefficients, Shannon index, and UC50. The Gini coefficient provides a measure of inequality in clonal abundance in each sample. The coefficient equals zero when all sites are equally abundant (polyclonal) and increases as fewer sites account for more of the total (oligoclonal). Shannon index is another widely used measure of diversity and it accounts for both abundance and evenness of the integration events. Alternatively, the UC50 is the number of unique clones which make up the top 50% of the sample's abundance. For polyclonal samples, one may expect a low Gini coefficient, high Shannon Index, and high UC50 (proportional to the total number of unique sites identified in the sample).

Under most circumstances only a subset of sites will be sampled. We thus include an estimate of sample size based on frequency of isolation information from the SonicLength method (Berry, 2012). The 'S.chao1' column denotes the estimated lower bound for population size derived using Chao estimate (Chao, 1987). If sample replicates were present then estimates were subjected to jackknife bias correction.

We estimate the numbers of cell clones sampled using the SonicLength method (Berry, 2012); this is summarized in the column "Inferred cells". Integration sites were recovered using ligation mediated PCR after random fragmentation of genomic DNA, which reduces recovery biases compared with restriction enzyme cleavage. Relative abundance was not measured from read counts, which are known to be inaccurate, but from marks introduced into DNA specimens prior to PCR amplification using the SonicLength method PMID:22238265.

We quantify population diversity using Gini coefficients, Shannon index, and UC50. The Gini coefficient provides a measure of inequality in clonal abundance in each sample. The coefficient equals zero when all sites are equally abundant (polyclonal) and increases as fewer sites account for more of the total (oligoclonal). Shannon index is another widely used measure of diversity and it accounts for both abundance and evenness of the integration events. UC50 is the number of clones which make up the top 50% of the sample's abundance. For polyclonal samples, one may expect a low Gini coefficient, high Shannon Index, and high UC50 (proportional to the total number of unique sites identified in the sample).

Integration positions are reported with the format (nearest gene, chromosome, +/-, genomic position) where the nearest gene is the nearest transcriptional boundary to the integration position, '+' refers to integration in the positive orientation and '-' refers to integration in the reverse orientation. Reported distances are signed where where the sign indicates if integrations are upstream (-) or downstream (+, no sign) of the nearest gene. Nearest genes possess additional annotations described in the table below.

| Symbol | Meaning                                             |
|--------|-----------------------------------------------------|
| *      | site is within a transcription unit                 |
| ~      | site is within 50kb of a cancer related gene        |
| !      | nearest gene was associated with lymphoma in humans |

# Sample Summary

The table below provides population statistics for each analyzed sample. Occasionally multiple samples from the same cell fraction and time point are analyzed where only the sample with greatest number of inferred cells is considered in this report. Sample rows with NA listed in the TotalReads, InferredCells, UniqueSite and other columns represent samples which were analyzed but no integration sites were identified.

| GTSP     | dataSource | Timepoint | CellType | TotalReads | InferredCells | UniqueSites | Gini  | Chao1 | Shannon | Pielou | UC50 | Included | runDate    | VCN   |
|----------|------------|-----------|----------|------------|---------------|-------------|-------|-------|---------|--------|------|----------|------------|-------|
| GTSP3615 | Illumina   | M24       | PBMC     | 185,874    | 379           | 342         | 0.091 | 2,220 | 5.79    | 0.992  | 153  | yes      | 2020-10-14 | 1.130 |
| GTSP3616 | Illumina   | M72       | PBMC     | 140,628    | 537           | 442         | 0.161 | 2,068 | 5.98    | 0.982  | 174  | yes      | 2020-10-14 | 0.905 |

# Tracking of clonal abundances

## Relative abundance of cell clones

The relative abundances of cell clones is summarized in the stacked bar plots below. The cell fraction studied is named at the top of each plot and the time points are marked at the bottom. The different bars in each panel show the major cell clones, as marked by integration sites where the x-axis indicates time points and the y-axis is scaled by proportion of the total cells sampled. The top 10 most abundant clones from each cell type have been named by the nearest gene while the remaining sites are binned as low abundance (LowAbund; grey). The total number of genomic fragments used to identify integration sites are listed atop of each plot. These fragments are generated by restriction endonucleases in 454 sequencing experiments and by sonic shearing in Illumina sequencing experiments. Relative abundances are calculated using the total number of reads associated with clones in 454 sequencing experiments while the number of unique sonic breaks is used in Illumina sequencing experiments.

PBMC

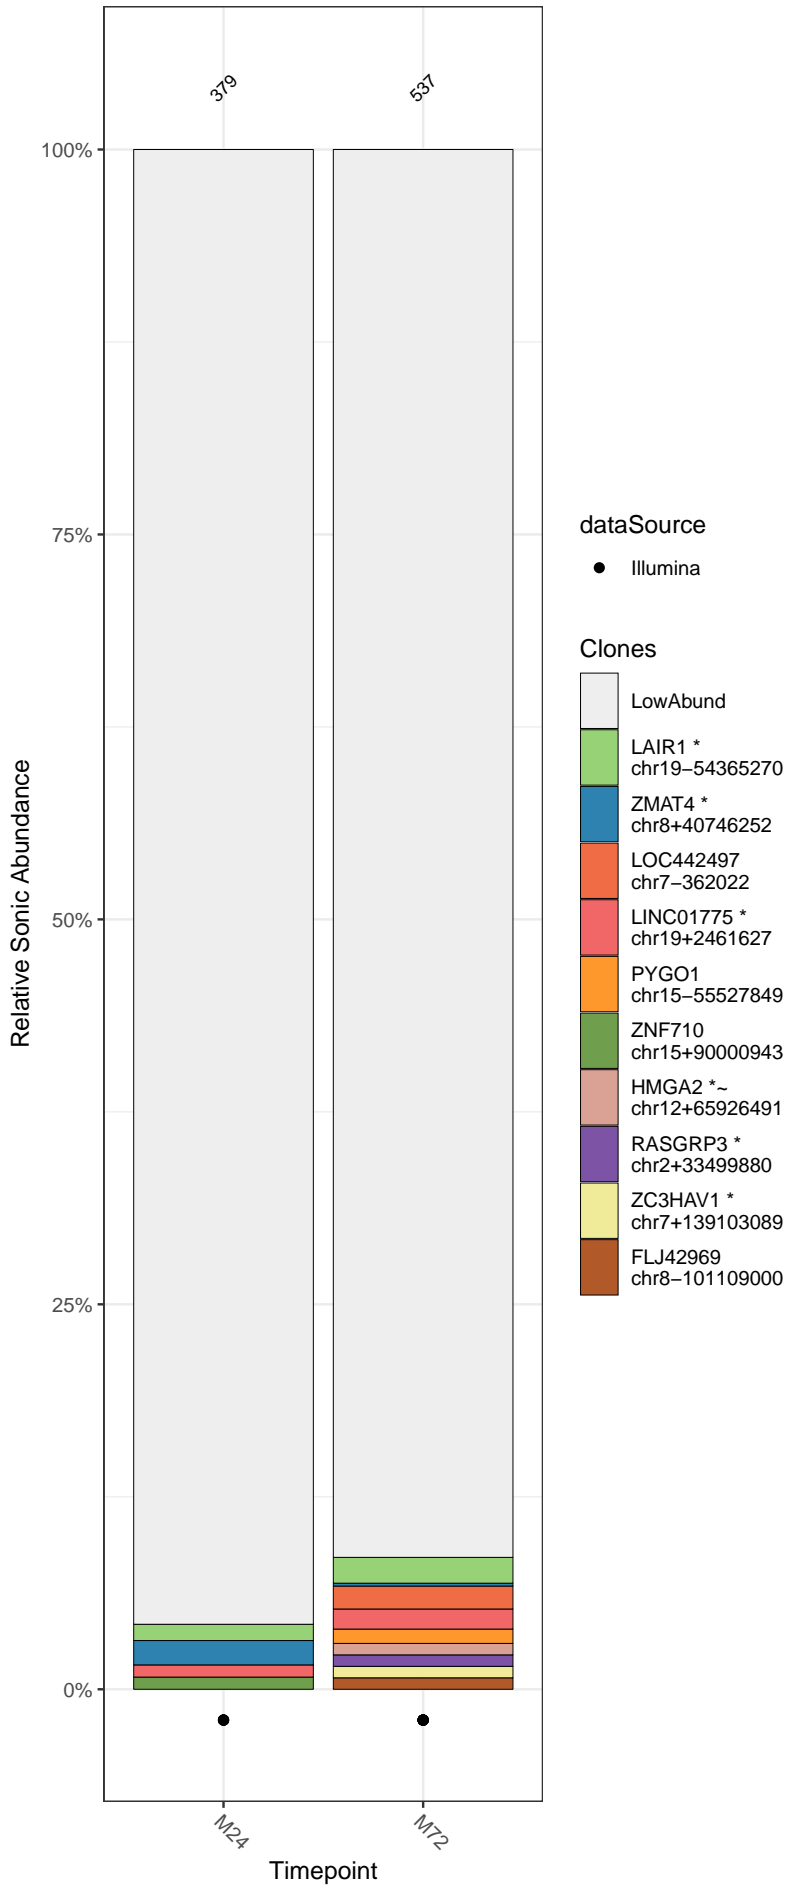

# Longitudinal behavior of major clones

When multiple time points are available, it is of interest to track the behavior of the most abundant clones across different cell types. A plot of the relative abundances of the most abundant 10 clones is shown below. For cases where only a single time point is available, the data is plotted as unlinked points.

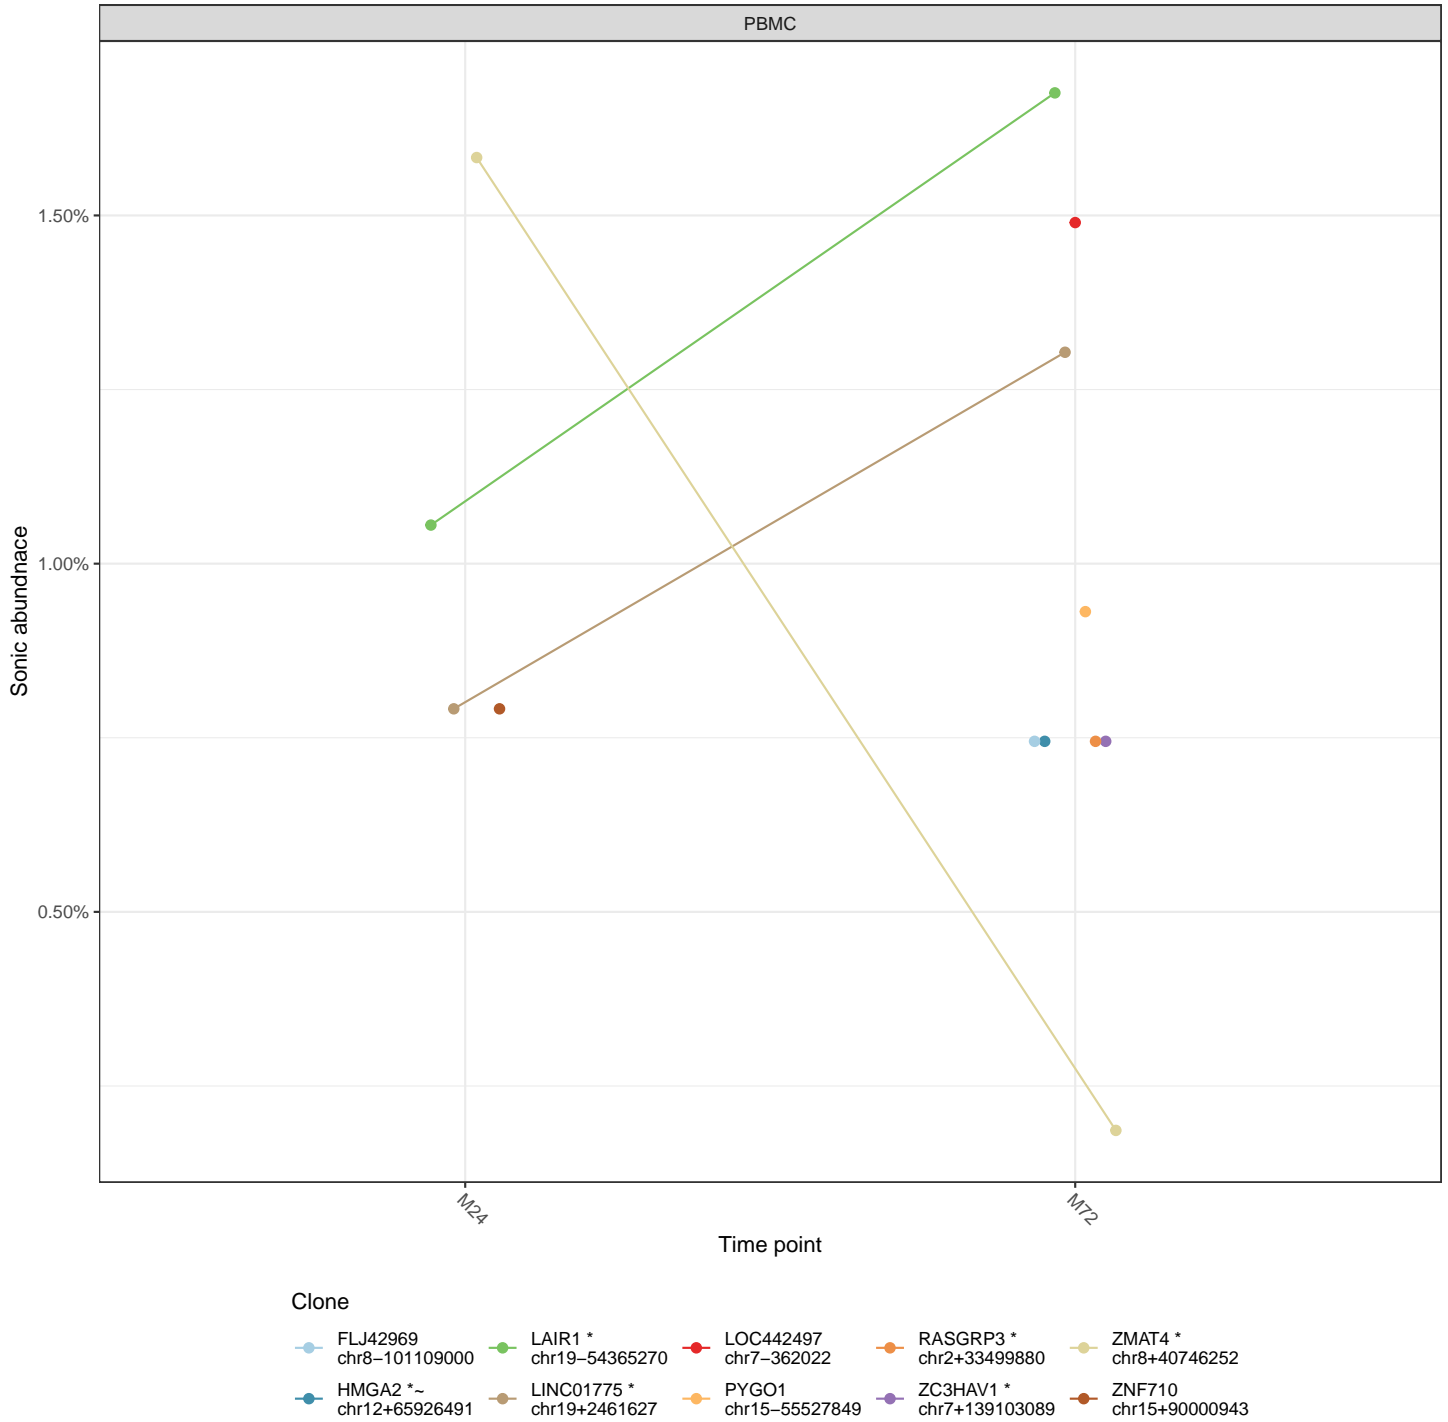



# Integration sites near particular genes of interest

Integration sites near genes that have been associated with adverse events are of particular interest. Below are longitudinal relative abundance plots that focus on the most abundant 5 clones whose nearest genes are LMO2, IKZF1, CCND2, HMGA2, and MECOM.

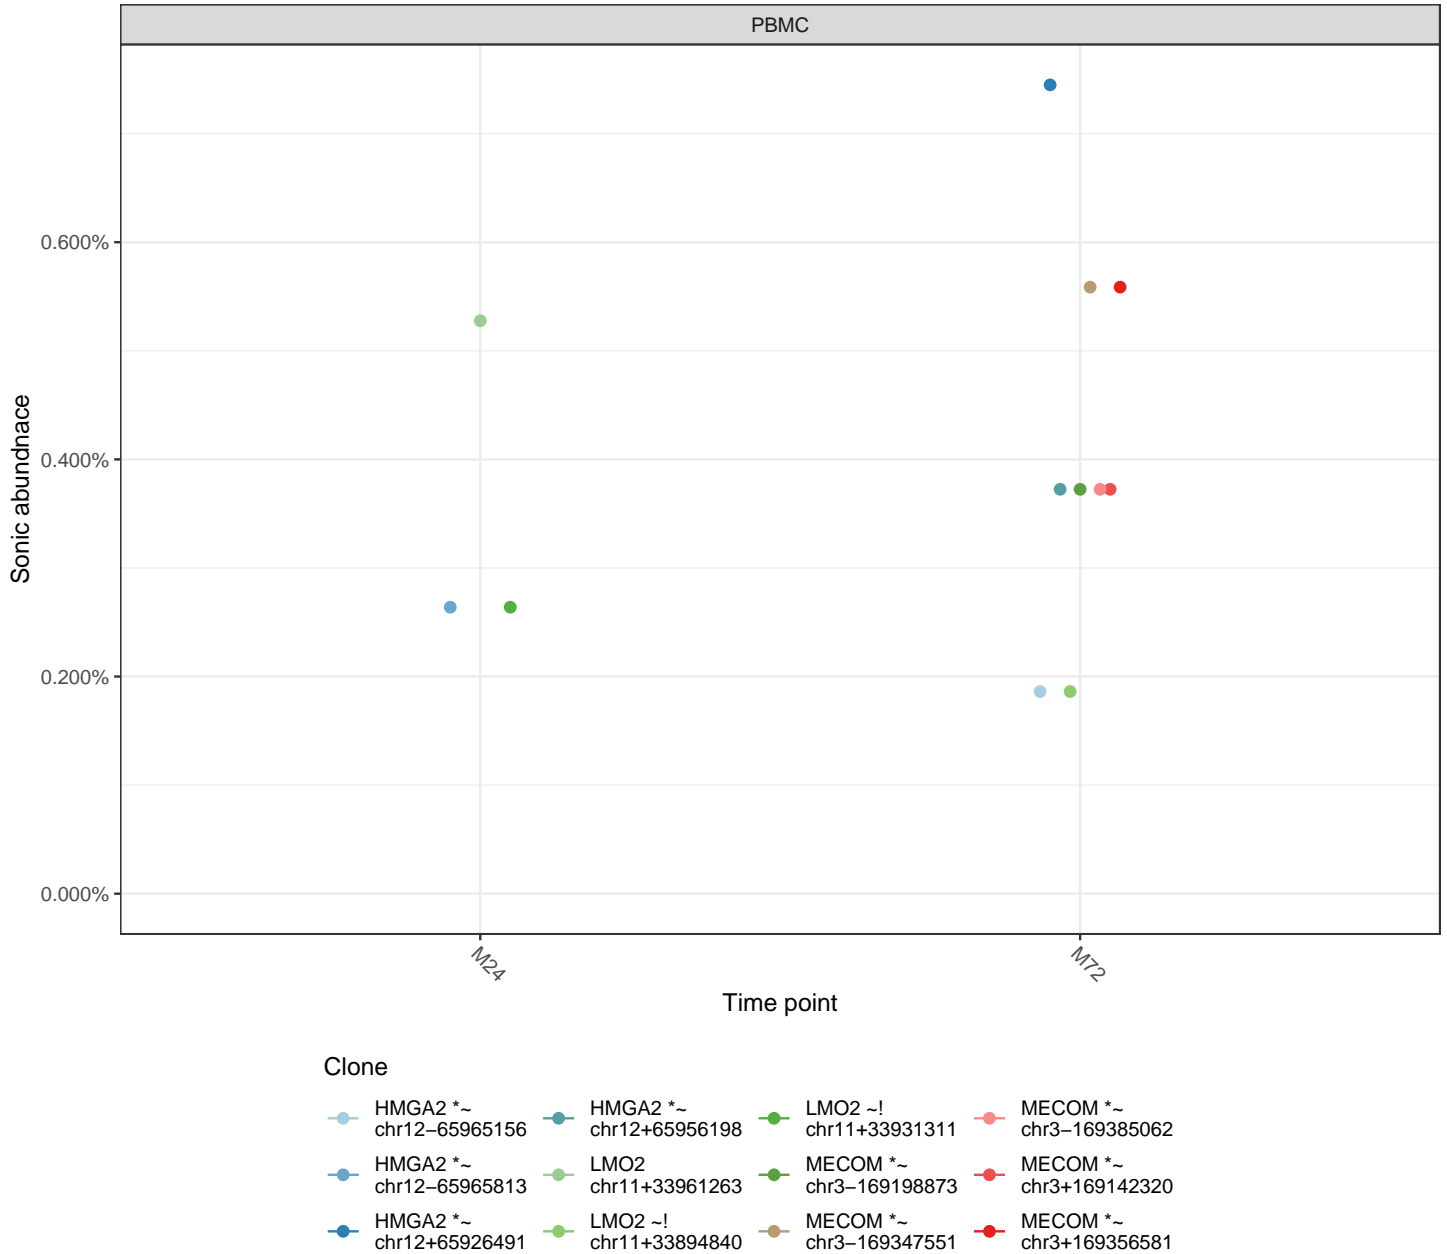

# Sample relative abundance heatmap

Alternatively, the relative abundances of the most abundant 10 clones from each cell sampled type can be visualized as a heat map.

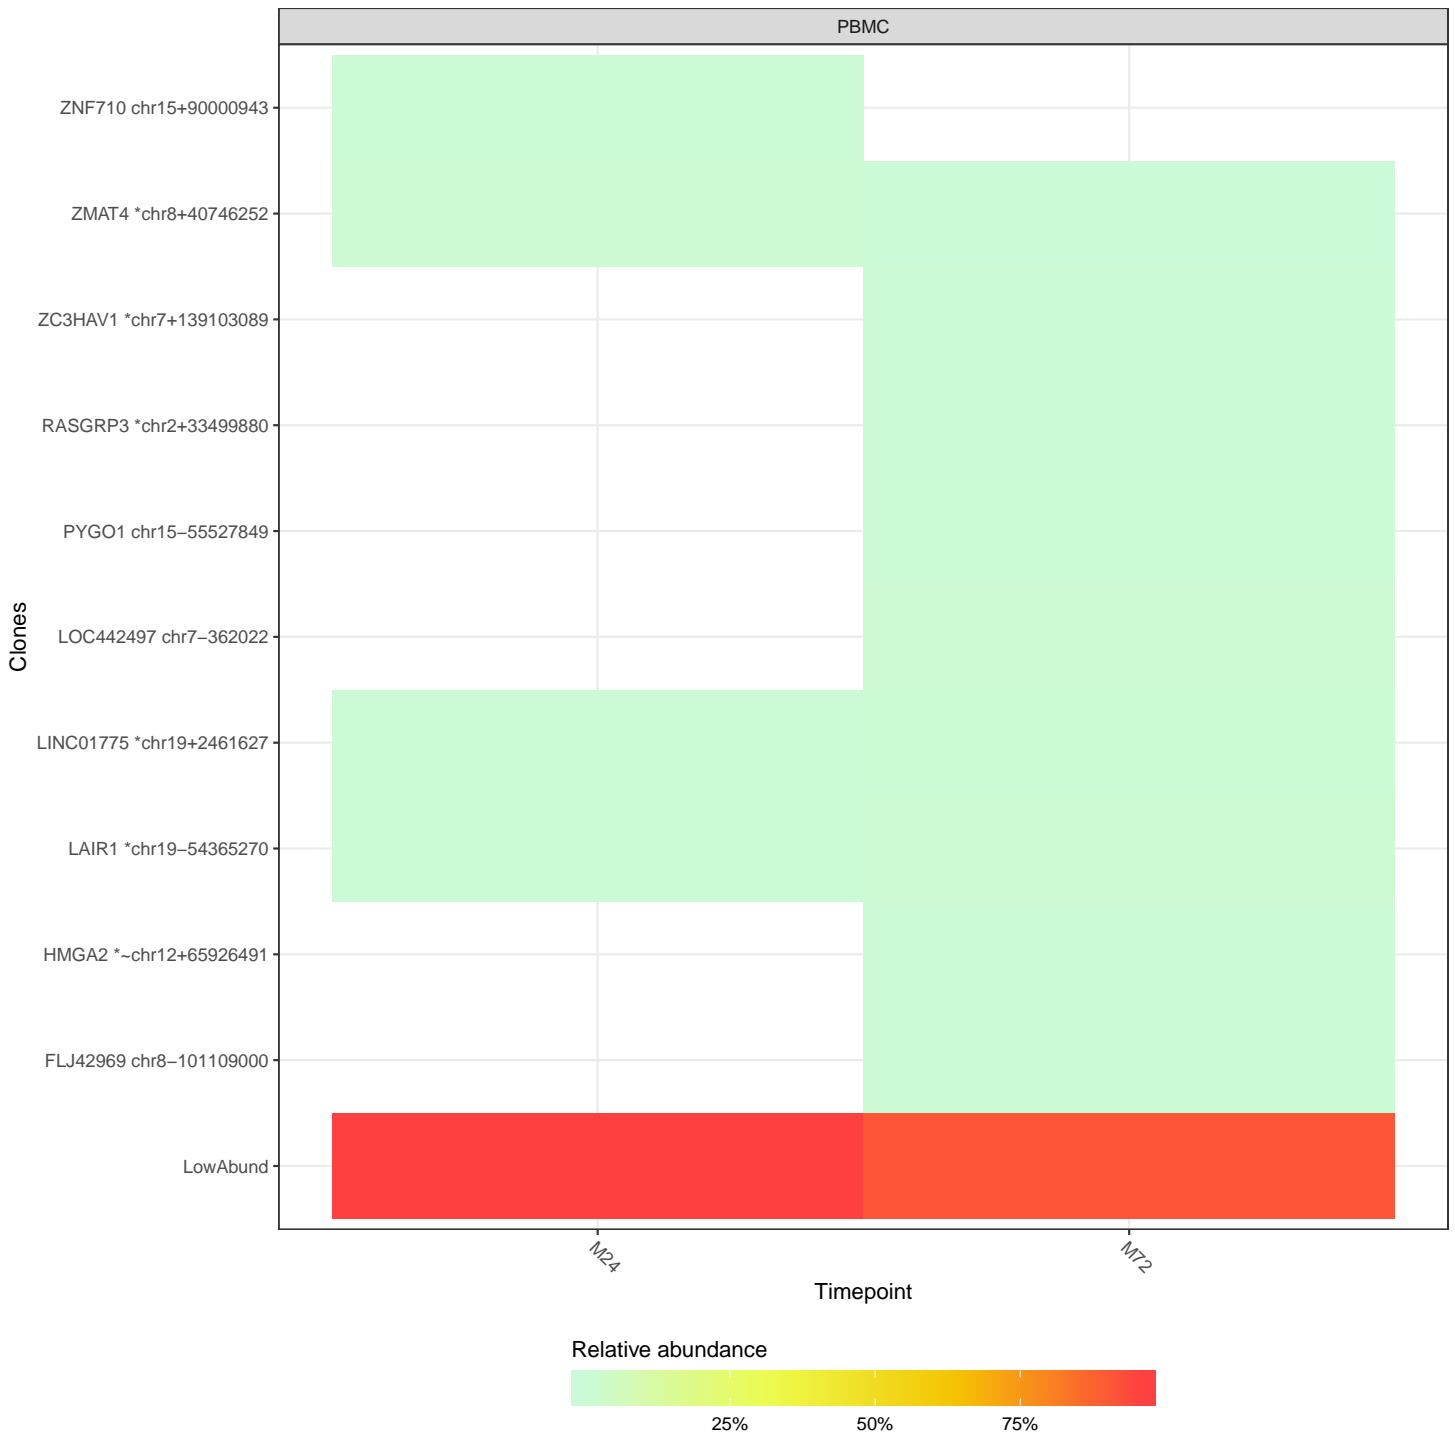

# What are the most frequently occurring gene types in the subject?

The word clouds below illustrate the nearest genes of the most abundant clones from each sample where the numeric ranges represent the upper and lower clonal abundances.

PBMC  
M24 1:6

LAIR1 \*  
ZMAT4 \*  
ZNF710  
LINC01775 \*

PBMC  
M72 1:9

MECOM \*~  
FLJ42969  
RASGRP3 \*  
FOXO1 \*~ HMGA2 \*~  
LINC01775 \*  
LAIR1 \*  
LOC442497  
PYGO1 LINC00158  
ZC3HAV1 \* MECOM \*~  
LDLRAD4 \* ZMAT4 \*  
KCNJ15 \*

# Multihits

This analysis has been looking at integration sites that can be uniquely mapped. But it is also helpful to look at reads finding multiple equally good alignments in the genome which can be referred to as 'Multihits'. If an integration site occurred within a repeat element (i.e. Alus, LINE, SINE, etc), then it might be helpful to access those sites for potential detrimental effects. These collection of sequences are analyzed separately due to their ambiguity.

No sample contained a multihit grouping which exceeded 20% of the sample's inferred cells.

# Methods

All coordinates are on human genome draft hg38.

Detailed methods can be found these publications:

- Bioinformatics. 2012 Mar 15; 28(6): 755–762.
- Mol Ther Methods Clin Dev. 2017 Mar 17; 4: 17–26.
- Mol Ther Methods Clin Dev. 2017 Mar 17; 4: 39–49.

Analysis software:

- INSPIRED v1.1 (<http://github.com/BushmanLab/INSPIRED>)

Report generation software:

- subjectReport v0.1 (<http://github.com/everettJK/geneTherapySubjectReport>)
